# Supplementary material for: Automated annotation of human centromeres with HORmon
Source: HighWire-hosted journal article supplement (doi:10.1101/gr.276362.121), 2022-05-11
Supplement: Supplemental_Files.zip [file Supplemental_File_HORDecompositions.docx]

### Supplementary Note “HORmon HOR decompositions”

### cen1

c5I1+L1+E1/16/19/5+H1/19/5p4-52p2-3c6I1+L1+E1/16/19/5+H1/19/5p4-52p2-3p1-5I1+L1+E1/16/19/5+H1/19/5p4-5I1+L1+E1/16/19/5+H1/19/5p4-5I1+L1+E1/16/19/5+H1/19/52D1/19/5+P1+F1/19+G1/19/5+V1/19.1I1+L1+E1/16/19/5+H1/19/53D1/19/5+P1+F1/19+G1/19/5+V1/19.1I1+L1+E1/16/19/5+H1/19/52p4-52I1+L1+E1/16/19/5+H1/19/52A1p4-5I1+L1+E1/16/19/5+H1/19/53p4-52I1+L1+E1/16/19/5+H1/19/55p4-5I1+L1+E1/16/19/5+H1/19/52p4-5I1+L1+E1/16/19/5+H1/19/5p4-52I1+L1+E1/16/19/5+H1/19/53p4-5I1+L1+E1/16/19/5+H1/19/52p4-52I1+L1+E1/16/19/5+H1/19/57p4-5I1+L1+E1/16/19/5+H1/19/52p4-54I1+L1+E1/16/19/5+H1/19/52p4-5I1+L1+E1/16/19/5+H1/19/5p4-52I1+L1+E1/16/19/5+H1/19/52D1/19/5+P1+F1/19+G1/19/5+V1/19.1I1+L1+E1/16/19/5+H1/19/52c5I1+L1+E1/16/19/5+H1/19/5c4p4-52I1+L1+E1/16/19/5+H1/19/5D1/19/5+P1+F1/19+G1/19/5+V1/19.1p4-6p2-5I1+L1+E1/16/19/5+H1/19/5p2-5p4-5c4p4-53I1+L1+E1/16/19/5+H1/19/52p4-6p2-5I1+L1+E1/16/19/5+H1/19/5p3-5p4-5c4p4-53I1+L1+E1/16/19/5+H1/19/53p1-5A1c52I1+L1+E1/16/19/5+H1/19/5p4-5c4p4-5I1+L1+E1/16/19/5+H1/19/52p4-52c4p4-5D1/19/5+P1+F1/19+G1/19/5+V1/19.1p6-3p6-1c6p4-1p6-2p4-5I1+L1+E1/16/19/5+H1/19/52c4p4-5c5I1+L1+E1/16/19/5+H1/19/52p4-5I1+L1+E1/16/19/5+H1/19/5c4p4-5c5I1+L1+E1/16/19/5+H1/19/52p4-5p2-5D1/19/5+P1+F1/19+G1/19/5+V1/19.1p5-3D1/19/5+P1+F1/19+G1/19/5+V1/19.0I1+L1+E1/16/19/5+H1/19/5p4-6c5p5-3I1+L1+E1/16/19/5+H1/19/5D1/19/5+P1+F1/19+G1/19/5+V1/19.1c5p5-3D1/19/5+P1+F1/19+G1/19/5+V1/19.0I1+L1+E1/16/19/5+H1/19/5D1/19/5+P1+F1/19+G1/19/5+V1/19.1c5p5-3I1+L1+E1/16/19/5+H1/19/5D1/19/5+P1+F1/19+G1/19/5+V1/19.1c5p5-3D1/19/5+P1+F1/19+G1/19/5+V1/19.0I1+L1+E1/16/19/5+H1/19/5D1/19/5+P1+F1/19+G1/19/5+V1/19.1c5p5-3D1/19/5+P1+F1/19+G1/19/5+V1/19.0I1+L1+E1/16/19/5+H1/19/5p4-5p4-6c5p5-3D1/19/5+P1+F1/19+G1/19/5+V1/19.0I1+L1+E1/16/19/5+H1/19/5p4-5p4-6c5p5-3D1/19/5+P1+F1/19+G1/19/5+V1/19.0I1+L1+E1/16/19/5+H1/19/5p4-5p4-6p5-3p6-1p6-2p4-5I1+L1+E1/16/19/5+H1/19/5p4-5I1+L1+E1/16/19/5+H1/19/5c4p4-5I1+L1+E1/16/19/5+H1/19/5p4-5p2-5c4D1/19/5+P1+F1/19+G1/19/5+V1/19.1p5-3D1/19/5+P1+F1/19+G1/19/5+V1/19.0I1+L1+E1/16/19/5+H1/19/5p4-6c5p5-3D1/19/5+P1+F1/19+G1/19/5+V1/19.0I1+L1+E1/16/19/5+H1/19/5p4-5p4-6c5I1+L1+E1/16/19/5+H1/19/5p5-6c5c4D1/19/5+P1+F1/19+G1/19/5+V1/19.0I1+L1+E1/16/19/5+H1/19/5p4-5p5-6c5c4D1/19/5+P1+F1/19+G1/19/5+V1/19.0I1+L1+E1/16/19/5+H1/19/5p4-5p4-6c5c4D1/19/5+P1+F1/19+G1/19/5+V1/19.0I1+L1+E1/16/19/5+H1/19/5p4-5p4-6c5I1+L1+E1/16/19/5+H1/19/5p4-1I1+L1+E1/16/19/5+H1/19/53p4-6I1+L1+E1/16/19/5+H1/19/52p4-53p4-1c6I1+L1+E1/16/19/5+H1/19/5p4-53c4p4-5I1+L1+E1/16/19/5+H1/19/5p4-5p4-2I1+L1+E1/16/19/5+H1/19/5c4p4-52c4p4-54I1+L1+E1/16/19/5+H1/19/5p4-5D1/19/5+P1+F1/19+G1/19/5+V1/19.1c6p4-52c4p4-5I1+L1+E1/16/19/5+H1/19/52c4p4-5I1+L1+E1/16/19/5+H1/19/5p4-53c4p4-5I1+L1+E1/16/19/5+H1/19/5c4I1+L1+E1/16/19/5+H1/19/5p4-53c4p4-5c4p4-5I1+L1+E1/16/19/5+H1/19/5c4p4-5D1/19/5+P1+F1/19+G1/19/5+V1/19.1c6I1+L1+E1/16/19/5+H1/19/5p4-5c4p4-52c4p4-5I1+L1+E1/16/19/5+H1/19/5p4-5c4p4-52c4p4-52D1/19/5+P1+F1/19+G1/19/5+V1/19.1p1-4p1-5p4-52p4-1p1-5p4-6I1+L1+E1/16/19/5+H1/19/5p4-5c4D1/19/5+P1+F1/19+G1/19/5+V1/19.1p1-5p4-52p4-1p6-1c6p4-1c6p4-52p4-1p6-1c6p4-1c62p4-5I1+L1+E1/16/19/5+H1/19/5c4p4-52c6p4-52p1-5p4-53I1+L1+E1/16/19/5+H1/19/53p4-5c5I1+L1+E1/16/19/5+H1/19/52p4-52c4p4-5I1+L1+E1/16/19/5+H1/19/5p4-53D1/19/5+P1+F1/19+G1/19/5+V1/19.1p3-5I1+L1+E1/16/19/5+H1/19/5c4p4-5I1+L1+E1/16/19/5+H1/19/5p4-52c4p4-5I1+L1+E1/16/19/5+H1/19/5p4-5p4-6I1+L1+E1/16/19/5+H1/19/5D1/19/5+P1+F1/19+G1/19/5+V1/19.1p3-5I1+L1+E1/16/19/5+H1/19/5c4p4-5p5-1c6p4-53D1/19/5+P1+F1/19+G1/19/5+V1/19.1p3-5I1+L1+E1/16/19/5+H1/19/5c1p1-5p4-52I1+L1+E1/16/19/5+H1/19/5p4-52I1+L1+E1/16/19/5+H1/19/52c5I1+L1+E1/16/19/5+H1/19/5p4-52p1-5p4-54D1/19/5+P1+F1/19+G1/19/5+V1/19.1I1+L1+E1/16/19/5+H1/19/5p4-5c43p4-53c5I1+L1+E1/16/19/5+H1/19/5c4p4-53p1-5p4-54D1/19/5+P1+F1/19+G1/19/5+V1/19.1I1+L1+E1/16/19/5+H1/19/5p4-5c44p4-52I1+L1+E1/16/19/5+H1/19/5c42p4-52c4p4-5I1+L1+E1/16/19/5+H1/19/53p4-5I1+L1+E1/16/19/5+H1/19/5p4-5c4p4-5c4p4-5I1+L1+E1/16/19/5+H1/19/5p4-5I1+L1+E1/16/19/5+H1/19/5D1/19/5+P1+F1/19+G1/19/5+V1/19.1p3-5p5-1p6-4p4-5I1+L1+E1/16/19/5+H1/19/5c4D1/19/5+P1+F1/19+G1/19/5+V1/19.1p4-5I1+L1+E1/16/19/5+H1/19/5c4p4-5c4p4-52I1+L1+E1/16/19/5+H1/19/5c4p4-6I1+L1+E1/16/19/5+H1/19/5p4-5c42p4-5c4D1/19/5+P1+F1/19+G1/19/5+V1/19.1p4-52c4D1/19/5+P1+F1/19+G1/19/5+V1/19.1p4-52D1/19/5+P1+F1/19+G1/19/5+V1/19.1c6I1+L1+E1/16/19/5+H1/19/5c42p4-5c5I1+L1+E1/16/19/5+H1/19/52c4p4-5c4p4-53c42p4-5c5I1+L1+E1/16/19/5+H1/19/52c4p4-5D1/19/5+P1+F1/19+G1/19/5+V1/19.1c6p4-52c42p4-5c5I1+L1+E1/16/19/5+H1/19/5p4-5c4p4-52c4p4-5c4p4-53c4p4-5I1+L1+E1/16/19/5+H1/19/5c4p4-6I1+L1+E1/16/19/5+H1/19/5p4-52c52I1+L1+E1/16/19/5+H1/19/5p4-52c5I1+L1+E1/16/19/5+H1/19/5p4-5I1+L1+E1/16/19/5+H1/19/5c4p4-5D1/19/5+P1+F1/19+G1/19/5+V1/19.1p4-5c4p4-52c5I1+L1+E1/16/19/5+H1/19/5c4p4-5c5I1+L1+E1/16/19/5+H1/19/52c4p4-5D1/19/5+P1+F1/19+G1/19/5+V1/19.1p4-5c4p4-52c5I1+L1+E1/16/19/5+H1/19/5c4p4-5c5I1+L1+E1/16/19/5+H1/19/52p4-53c52I1+L1+E1/16/19/5+H1/19/5p4-5c4p4-5p4-1c6c4p4-5I1+L1+E1/16/19/5+H1/19/5c4p4-5D1/19/5+P1+F1/19+G1/19/5+V1/19.1p4-5c4p4-52c5I1+L1+E1/16/19/5+H1/19/5c4p4-5c5I1+L1+E1/16/19/5+H1/19/52p4-6I1+L1+E1/16/19/5+H1/19/5p4-5c5I1+L1+E1/16/19/5+H1/19/5p4-5c5I1+L1+E1/16/19/5+H1/19/5c6p4-5c4p4-52c4p4-5D1/19/5+P1+F1/19+G1/19/5+V1/19.1c6D1/19/5+P1+F1/19+G1/19/5+V1/19.1D1/19/5+P1+F1/19+G1/19/5+V1/19.0I1+L1+E1/16/19/5+H1/19/5c4p4-5c4p4-53D1/19/5+P1+F1/19+G1/19/5+V1/19.1p3-5c4p4-53D1/19/5+P1+F1/19+G1/19/5+V1/19.1p3-5I1+L1+E1/16/19/5+H1/19/5D1/19/5+P1+F1/19+G1/19/5+V1/19.1p3-5p4-53I1+L1+E1/16/19/5+H1/19/5D1/19/5+P1+F1/19+G1/19/5+V1/19.1c3p3-4p4-5D1/19/5+P1+F1/19+G1/19/5+V1/19.1p6-4D1/19/5+P1+F1/19+G1/19/5+V1/19.1p6-4p4-5c5p4-5I1+L1+E1/16/19/5+H1/19/5D1/19/5+P1+F1/19+G1/19/5+V1/19.1p3-5I1+L1+E1/16/19/5+H1/19/5p4-5c5p4-5I1+L1+E1/16/19/5+H1/19/5D1/19/5+P1+F1/19+G1/19/5+V1/19.1p3-5I1+L1+E1/16/19/5+H1/19/5p4-5I1+L1+E1/16/19/5+H1/19/5p4-5I1+L1+E1/16/19/5+H1/19/5D1/19/5+P1+F1/19+G1/19/5+V1/19.1p3-5p4-53I1+L1+E1/16/19/5+H1/19/5D1/19/5+P1+F1/19+G1/19/5+V1/19.1c3p3-4p4-5D1/19/5+P1+F1/19+G1/19/5+V1/19.1p6-4p4-5c5I1+L1+E1/16/19/5+H1/19/5p4-5c4D1/19/5+P1+F1/19+G1/19/5+V1/19.1p4-5I1+L1+E1/16/19/5+H1/19/5p4-5c4p4-5c6p4-5I1+L1+E1/16/19/5+H1/19/5p4-52c4p4-5c6p4-5I1+L1+E1/16/19/5+H1/19/5p4-5D1/19/5+P1+F1/19+G1/19/5+V1/19.1p3-5I1+L1+E1/16/19/5+H1/19/5p4-5D1/19/5+P1+F1/19+G1/19/5+V1/19.1p3-5I1+L1+E1/16/19/5+H1/19/52D1/19/5+P1+F1/19+G1/19/5+V1/19.1p3-5I1+L1+E1/16/19/5+H1/19/5p4-5I1+L1+E1/16/19/5+H1/19/5p4-5I1+L1+E1/16/19/5+H1/19/5D1/19/5+P1+F1/19+G1/19/5+V1/19.1p3-5p4-53D1/19/5+P1+F1/19+G1/19/5+V1/19.1c3p3-4p4-5D1/19/5+P1+F1/19+G1/19/5+V1/19.1p6-4p4-5c5I1+L1+E1/16/19/5+H1/19/5p4-5I1+L1+E1/16/19/5+H1/19/5p4-5c4p4-52I1+L1+E1/16/19/5+H1/19/5p4-5c4I1+L1+E1/16/19/5+H1/19/52D1/19/5+P1+F1/19+G1/19/5+V1/19.1p3-4p4-5I1+L1+E1/16/19/5+H1/19/5c4p4-5D1/19/5+P1+F1/19+G1/19/5+V1/19.1c62p4-2I1+L1+E1/16/19/5+H1/19/5p4-5c4p4-52I1+L1+E1/16/19/5+H1/19/5p4-5c4p4-5c6p4-5I1+L1+E1/16/19/5+H1/19/5p4-5c4I1+L1+E1/16/19/5+H1/19/5p4-5D1/19/5+P1+F1/19+G1/19/5+V1/19.1c6p4-5I1+L1+E1/16/19/5+H1/19/5p4-5c4I1+L1+E1/16/19/5+H1/19/5p4-5c4p4-5c4p4-5c4p4-5p3-5p4-2I1+L1+E1/16/19/5+H1/19/5p4-52I1+L1+E1/16/19/5+H1/19/5p4-5c4I1+L1+E1/16/19/5+H1/19/52c4I1+L1+E1/16/19/5+H1/19/5p4-54c4p4-5p3-5p4-2I1+L1+E1/16/19/5+H1/19/5p4-52I1+L1+E1/16/19/5+H1/19/5p4-5c4I1+L1+E1/16/19/5+H1/19/52c4p4-5p3-5p4-2I1+L1+E1/16/19/5+H1/19/5p4-52p4-6I1+L1+E1/16/19/5+H1/19/52c4I1+L1+E1/16/19/5+H1/19/5p4-55c4p4-5p3-5p4-2I1+L1+E1/16/19/5+H1/19/5p4-52I1+L1+E1/16/19/5+H1/19/5p4-5c4I1+L1+E1/16/19/5+H1/19/5p4-5c4p4-5c4p4-5p3-5p4-2I1+L1+E1/16/19/5+H1/19/5p4-5I1+L1+E1/16/19/5+H1/19/5c4I1+L1+E1/16/19/5+H1/19/5p4-55c4p4-5p3-5p4-2I1+L1+E1/16/19/5+H1/19/5p4-52I1+L1+E1/16/19/5+H1/19/5p4-5c4I1+L1+E1/16/19/5+H1/19/5p4-5c4p4-5c4p4-52c4p4-5I1+L1+E1/16/19/5+H1/19/5p4-5c4p4-5p4-2I1+L1+E1/16/19/5+H1/19/5c4p4-52I1+L1+E1/16/19/5+H1/19/5p4-5I1+L1+E1/16/19/5+H1/19/5p4-5c4p4-56c42p4-5I1+L1+E1/16/19/5+H1/19/52c42p4-5D1/19/5+P1+F1/19+G1/19/5+V1/19.1c62p4-52c4I1+L1+E1/16/19/5+H1/19/5p4-52I1+L1+E1/16/19/5+H1/19/5p4-52c4p4-5I1+L1+E1/16/19/5+H1/19/5p4-52c4p4-5I1+L1+E1/16/19/5+H1/19/5c4I1+L1+E1/16/19/5+H1/19/5p4-54c4p4-5I1+L1+E1/16/19/5+H1/19/5p4-52c4p4-5I1+L1+E1/16/19/5+H1/19/5c4I1+L1+E1/16/19/5+H1/19/5p4-54c4p4-5I1+L1+E1/16/19/5+H1/19/5p4-53I1+L1+E1/16/19/5+H1/19/5p4-53I1+L1+E1/16/19/5+H1/19/5p4-52I1+L1+E1/16/19/5+H1/19/5p4-5c4p4-5I1+L1+E1/16/19/5+H1/19/52p4-5c4p4-5I1+L1+E1/16/19/5+H1/19/52p4-5c4p4-53p4-1I1+L1+E1/16/19/5+H1/19/54p4-5c4p4-52c4p4-5I1+L1+E1/16/19/5+H1/19/5p4-52c4p4-5D1/19/5+P1+F1/19+G1/19/5+V1/19.1c4p4-5I1+L1+E1/16/19/5+H1/19/5p4-53p4-1I1+L1+E1/16/19/5+H1/19/52p4-53p4-1I1+L1+E1/16/19/5+H1/19/52p4-54D1/19/5+P1+F1/19+G1/19/5+V1/19.1c6D1/19/5+P1+F1/19+G1/19/5+V1/19.0I1+L1+E1/16/19/5+H1/19/5p4-54p4-6I1+L1+E1/16/19/5+H1/19/5p4-53p4-6I1+L1+E1/16/19/5+H1/19/5p4-53c4p4-5c4p4-5I1+L1+E1/16/19/5+H1/19/5p4-52I1+L1+E1/16/19/5+H1/19/5p4-53c4p4-52I1+L1+E1/16/19/5+H1/19/52D1/19/5+P1+F1/19+G1/19/5+V1/19.1c6I1+L1+E1/16/19/5+H1/19/5p4-5p5-3I1+L1+E1/16/19/5+H1/19/5p4-54p4-6I1+L1+E1/16/19/5+H1/19/5p4-54p4-6I1+L1+E1/16/19/5+H1/19/5p4-5p4-6I1+L1+E1/16/19/5+H1/19/5p4-53c4p4-5c4p4-5I1+L1+E1/16/19/5+H1/19/5p4-59c4p4-5D1/19/5+P1+F1/19+G1/19/5+V1/19.1I1+L1+E1/16/19/5+H1/19/5p4-53c4p4-52I1+L1+E1/16/19/5+H1/19/5c4p4-5I1+L1+E1/16/19/5+H1/19/5p4-5c4p4-53p5-3I1+L1+E1/16/19/5+H1/19/5p4-53c4c5I1+L1+E1/16/19/5+H1/19/52p4-53c42p4-5I1+L1+E1/16/19/5+H1/19/5p4-52c4p4-5I1+L1+E1/16/19/5+H1/19/5p4-53I1+L1+E1/16/19/5+H1/19/5p4-52c4p4-53I1+L1+E1/16/19/5+H1/19/5c4p4-5I1+L1+E1/16/19/5+H1/19/5p4-5c4p4-5I1+L1+E1/16/19/5+H1/19/5p4-55c4p4-58c4p4-54c4p4-53I1+L1+E1/16/19/5+H1/19/5c42p4-5I1+L1+E1/16/19/5+H1/19/5p4-55c42p4-5c4p4-55c4p4-5I1+L1+E1/16/19/5+H1/19/5p4-52I1+L1+E1/16/19/5+H1/19/5p4-5c4p4-52I1+L1+E1/16/19/5+H1/19/52p4-5c4p4-5I1+L1+E1/16/19/5+H1/19/5p4-52I1+L1+E1/16/19/5+H1/19/5p4-5c4p4-52I1+L1+E1/16/19/5+H1/19/52p4-5c42p4-5I1+L1+E1/16/19/5+H1/19/5p4-52c4p4-5I1+L1+E1/16/19/5+H1/19/5p4-52c4p4-5c4p4-5I1+L1+E1/16/19/5+H1/19/5p4-5c4p4-5I1+L1+E1/16/19/5+H1/19/5p4-5c4p4-5I1+L1+E1/16/19/5+H1/19/5p4-53c4p4-5c4p4-53c4p4-5I1+L1+E1/16/19/5+H1/19/5p4-52I1+L1+E1/16/19/5+H1/19/5p4-5c4p4-52I1+L1+E1/16/19/5+H1/19/52p4-5c42p4-5I1+L1+E1/16/19/5+H1/19/5p4-52c4p4-5I1+L1+E1/16/19/5+H1/19/5p4-52c4p4-5c4p4-5I1+L1+E1/16/19/5+H1/19/5p4-5c4p4-5I1+L1+E1/16/19/5+H1/19/5p4-5c4p4-5I1+L1+E1/16/19/5+H1/19/5p4-53c4p4-5c4p4-53I1+L1+E1/16/19/5+H1/19/52c4p4-5I1+L1+E1/16/19/5+H1/19/52p4-5D1/19/5+P1+F1/19+G1/19/5+V1/19.1c4p4-53c4p4-52c4D1/19/5+P1+F1/19+G1/19/5+V1/19.1c6c5I1+L1+E1/16/19/5+H1/19/5p4-53c4D1/19/5+P1+F1/19+G1/19/5+V1/19.1c6I1+L1+E1/16/19/5+H1/19/5p4-53c4p4-53c4p4-5I1+L1+E1/16/19/5+H1/19/5p4-53c4p4-5I1+L1+E1/16/19/5+H1/19/5p4-53c4p4-53c4p4-52c4p4-53c4p4-5I1+L1+E1/16/19/5+H1/19/5p4-53c4p4-5c4p4-52c4p4-54c4D1/19/5+P1+F1/19+G1/19/5+V1/19.1c6c4p4-5I1+L1+E1/16/19/5+H1/19/5p4-5c4p4-5c42p4-5I1+L1+E1/16/19/5+H1/19/5p4-53c4p4-5I1+L1+E1/16/19/5+H1/19/5p4-5c42p4-5I1+L1+E1/16/19/5+H1/19/5p4-53c4p4-5I1+L1+E1/16/19/5+H1/19/5p4-53c42p4-5I1+L1+E1/16/19/5+H1/19/5p4-5c4p4-5I1+L1+E1/16/19/5+H1/19/5p4-5c4p4-54c4p4-56c4p4-5I1+L1+E1/16/19/5+H1/19/5p4-5c4p4-5I1+L1+E1/16/19/5+H1/19/5p4-5c4p4-54c4p4-56c4p4-5c4p4-5c4p4-52c4p4-54c4D1/19/5+P1+F1/19+G1/19/5+V1/19.1c6c4p4-5I1+L1+E1/16/19/5+H1/19/5p4-5c4p4-5c42p4-5I1+L1+E1/16/19/5+H1/19/5p4-53c4p4-5I1+L1+E1/16/19/5+H1/19/5p4-5c42p4-5I1+L1+E1/16/19/5+H1/19/5p4-53c4p4-5I1+L1+E1/16/19/5+H1/19/5p4-53c42p4-5I1+L1+E1/16/19/5+H1/19/5p4-5c4p4-5I1+L1+E1/16/19/5+H1/19/5p4-5c4p4-54c4p4-56c4p4-5I1+L1+E1/16/19/5+H1/19/5p4-5c4p4-5I1+L1+E1/16/19/5+H1/19/5p4-5c4p4-54c4p4-56c4p4-5I1+L1+E1/16/19/5+H1/19/5p4-52c42p4-5I1+L1+E1/16/19/5+H1/19/5p4-54c4p4-5I1+L1+E1/16/19/5+H1/19/5p4-5I1+L1+E1/16/19/5+H1/19/5p4-53B1/19/5I1+L1+E1/16/19/5+H1/19/5c4p4-52c42p4-5I1+L1+E1/16/19/5+H1/19/5p4-56c42p4-5I1+L1+E1/16/19/5+H1/19/5p4-54c4p4-5I1+L1+E1/16/19/5+H1/19/5p4-5I1+L1+E1/16/19/5+H1/19/5p4-53p2-5p4-52c4p4-54c4p4-5I1+L1+E1/16/19/5+H1/19/5p4-5I1+L1+E1/16/19/5+H1/19/5p4-53p2-5p4-52c4p4-54c4p4-5I1+L1+E1/16/19/5+H1/19/5p4-5I1+L1+E1/16/19/5+H1/19/5p4-5I1+L1+E1/16/19/5+H1/19/5p4-5c4p4-5I1+L1+E1/16/19/5+H1/19/5p4-5I1+L1+E1/16/19/5+H1/19/5p4-5I1+L1+E1/16/19/5+H1/19/5p4-5I1+L1+E1/16/19/5+H1/19/5p4-53p2-5p4-53c4I1+L1+E1/16/19/5+H1/19/5p4-5c4p4-5I1+L1+E1/16/19/5+H1/19/5c4p4-52c4p4-5I1+L1+E1/16/19/5+H1/19/5p4-5c4p4-5I1+L1+E1/16/19/5+H1/19/5c4p4-52c4p4-5I1+L1+E1/16/19/5+H1/19/5p4-5c4p4-5I1+L1+E1/16/19/5+H1/19/5p4-5c4p4-5I1+L1+E1/16/19/5+H1/19/5c4p4-52c4p4-5I1+L1+E1/16/19/5+H1/19/5p4-5c4p4-5I1+L1+E1/16/19/5+H1/19/5p4-5c4D1/19/5+P1+F1/19+G1/19/5+V1/19.1I1+L1+E1/16/19/5+H1/19/5p4-5c4p4-5I1+L1+E1/16/19/5+H1/19/5p4-5c4p4-52c4p4-5I1+L1+E1/16/19/5+H1/19/5p4-5c4p4-5I1+L1+E1/16/19/5+H1/19/5c4D1/19/5+P1+F1/19+G1/19/5+V1/19.1I1+L1+E1/16/19/5+H1/19/5p4-5c4p4-5I1+L1+E1/16/19/5+H1/19/5p4-5c4D1/19/5+P1+F1/19+G1/19/5+V1/19.1I1+L1+E1/16/19/5+H1/19/5p4-5c4p4-5I1+L1+E1/16/19/5+H1/19/5p4-5c4I1+L1+E1/16/19/5+H1/19/5p4-5I1+L1+E1/16/19/5+H1/19/5p4-5c4p4-5I1+L1+E1/16/19/5+H1/19/5D1/19/5+P1+F1/19+G1/19/5+V1/19.1D1/19/5+P1+F1/19+G1/19/5+V1/19.0p2-5I1+L1+E1/16/19/5+H1/19/5p4-53c4p4-5I1+L1+E1/16/19/5+H1/19/5p4-53c42p4-5I1+L1+E1/16/19/5+H1/19/5p4-5c4p4-5I1+L1+E1/16/19/5+H1/19/5p4-5c4p4-53c4p4-54c4p4-56c4p4-54c42p4-5I1+L1+E1/16/19/5+H1/19/5p4-54c4p4-5I1+L1+E1/16/19/5+H1/19/5p4-5I1+L1+E1/16/19/5+H1/19/5p4-53B1/19/5I1+L1+E1/16/19/5+H1/19/5c4p4-54c42p4-5I1+L1+E1/16/19/5+H1/19/5p4-54B1/19/5p4-53c4p4-54c4p4-5I1+L1+E1/16/19/5+H1/19/5p4-5I1+L1+E1/16/19/5+H1/19/5p4-53p2-5p4-52c4p4-54c4p4-5I1+L1+E1/16/19/5+H1/19/5p4-5I1+L1+E1/16/19/5+H1/19/5p4-5I1+L1+E1/16/19/5+H1/19/5p4-5I1+L1+E1/16/19/5+H1/19/5p4-53p2-5p4-53c4I1+L1+E1/16/19/5+H1/19/5p4-5c4p4-5I1+L1+E1/16/19/5+H1/19/5c4c62I1+L1+E1/16/19/5+H1/19/5p4-54c4p4-5I1+L1+E1/16/19/5+H1/19/5p4-5I1+L1+E1/16/19/5+H1/19/5p4-53B1/19/5p4-53c4p4-54c4p4-5I1+L1+E1/16/19/5+H1/19/5p4-5I1+L1+E1/16/19/5+H1/19/5p4-53p2-5p4-52c4p4-54c4p4-5I1+L1+E1/16/19/5+H1/19/5p4-5I1+L1+E1/16/19/5+H1/19/5p4-5I1+L1+E1/16/19/5+H1/19/5p4-5I1+L1+E1/16/19/5+H1/19/5p4-53p2-5p4-55c4p4-5I1+L1+E1/16/19/5+H1/19/5p4-5I1+L1+E1/16/19/5+H1/19/5p4-5I1+L1+E1/16/19/5+H1/19/5p4-5I1+L1+E1/16/19/5+H1/19/5p4-53p2-5p4-53c4p4-52c4p4-5I1+L1+E1/16/19/5+H1/19/5p4-5c4p4-5I1+L1+E1/16/19/5+H1/19/5c4p4-52c4p4-5I1+L1+E1/16/19/5+H1/19/5c4p4-52c4p4-5I1+L1+E1/16/19/5+H1/19/5p4-5c4p4-5I1+L1+E1/16/19/5+H1/19/5c4p4-52c4p4-5c4p4-52c4p4-5I1+L1+E1/16/19/5+H1/19/5p4-5c4p4-5I1+L1+E1/16/19/5+H1/19/5c4p4-52c4p4-5I1+L1+E1/16/19/5+H1/19/5c4p4-52c4p4-5I1+L1+E1/16/19/5+H1/19/5p4-5c4p4-5I1+L1+E1/16/19/5+H1/19/5c4p4-52c4p4-5I1+L1+E1/16/19/5+H1/19/5p4-5c4p4-5I1+L1+E1/16/19/5+H1/19/5p4-5c4D1/19/5+P1+F1/19+G1/19/5+V1/19.1I1+L1+E1/16/19/5+H1/19/5p4-5c4p4-5I1+L1+E1/16/19/5+H1/19/5p4-5c4p4-52c4p4-5I1+L1+E1/16/19/5+H1/19/5p4-5c4D1/19/5+P1+F1/19+G1/19/5+V1/19.1I1+L1+E1/16/19/5+H1/19/5p4-5c4p4-5I1+L1+E1/16/19/5+H1/19/5p4-5c4p4-5I1+L1+E1/16/19/5+H1/19/5p4-5c4p4-5I1+L1+E1/16/19/5+H1/19/5p4-5c4I1+L1+E1/16/19/5+H1/19/5p4-5I1+L1+E1/16/19/5+H1/19/5p4-5c4p4-5I1+L1+E1/16/19/5+H1/19/5p4-6p2-5I1+L1+E1/16/19/5+H1/19/5p4-52I1+L1+E1/16/19/5+H1/19/5p3-5c4p4-52c4p4-5I1+L1+E1/16/19/5+H1/19/5p4-52I1+L1+E1/16/19/5+H1/19/5p3-5I1+L1+E1/16/19/5+H1/19/5p4-5c4p4-52c4p4-5I1+L1+E1/16/19/5+H1/19/5p4-5c4p4-5I1+L1+E1/16/19/5+H1/19/5p4-52I1+L1+E1/16/19/5+H1/19/5p3-5c4p4-5I1+L1+E1/16/19/5+H1/19/5p4-5c4p4-5I1+L1+E1/16/19/5+H1/19/5p4-5c4D1/19/5+P1+F1/19+G1/19/5+V1/19.1I1+L1+E1/16/19/5+H1/19/5p4-5c4p4-5I1+L1+E1/16/19/5+H1/19/52p4-5c4p4-5I1+L1+E1/16/19/5+H1/19/5p4-52I1+L1+E1/16/19/5+H1/19/5p3-5p4-5c4p4-5I1+L1+E1/16/19/5+H1/19/5p4-52I1+L1+E1/16/19/5+H1/19/5p3-5I1+L1+E1/16/19/5+H1/19/5p4-5c4p4-52I1+L1+E1/16/19/5+H1/19/5D1/19/5+P1+F1/19+G1/19/5+V1/19.1p1-5p4-5I1+L1+E1/16/19/5+H1/19/5p4-5c4p4-52c4p4-52I1+L1+E1/16/19/5+H1/19/52c4p4-53I1+L1+E1/16/19/5+H1/19/5p3-5I1+L1+E1/16/19/5+H1/19/5c4p4-52c42p4-5I1+L1+E1/16/19/5+H1/19/5p4-5c4p4-5I1+L1+E1/16/19/5+H1/19/5p4-5c4p4-5I1+L1+E1/16/19/5+H1/19/5c4p4-52c42p4-5I1+L1+E1/16/19/5+H1/19/5p4-5c4p4-5I1+L1+E1/16/19/5+H1/19/5p4-5c4p4-5I1+L1+E1/16/19/5+H1/19/5p4-52c4p4-5I1+L1+E1/16/19/5+H1/19/5p4-5D1/19/5+P1+F1/19+G1/19/5+V1/19.1I1+L1+E1/16/19/5+H1/19/5p4-52c4p4-5I1+L1+E1/16/19/5+H1/19/5p4-5D1/19/5+P1+F1/19+G1/19/5+V1/19.1I1+L1+E1/16/19/5+H1/19/5p4-5c4p4-53c4p4-5I1+L1+E1/16/19/5+H1/19/5p4-5c4p4-5I1+L1+E1/16/19/5+H1/19/5p4-5c4p4-5I1+L1+E1/16/19/5+H1/19/5p4-5c4p4-5I1+L1+E1/16/19/5+H1/19/5p4-52c4p4-5I1+L1+E1/16/19/5+H1/19/5p4-5D1/19/5+P1+F1/19+G1/19/5+V1/19.1I1+L1+E1/16/19/5+H1/19/5p4-5c4p4-53c4p4-52I1+L1+E1/16/19/5+H1/19/5p4-5c4p4-5I1+L1+E1/16/19/5+H1/19/5p4-5c4p4-52I1+L1+E1/16/19/5+H1/19/5p4-5c4p4-5D1/19/5+P1+F1/19+G1/19/5+V1/19.1I1+L1+E1/16/19/5+H1/19/5p4-5c4p4-5I1+L1+E1/16/19/5+H1/19/5p4-5c4p4-5I1+L1+E1/16/19/5+H1/19/5p4-5c4p4-5I1+L1+E1/16/19/5+H1/19/5p4-5c4p4-5I1+L1+E1/16/19/5+H1/19/5p4-5c4p4-5I1+L1+E1/16/19/5+H1/19/5p4-52c4p4-5I1+L1+E1/16/19/5+H1/19/5p4-5D1/19/5+P1+F1/19+G1/19/5+V1/19.1I1+L1+E1/16/19/5+H1/19/5p4-5c4p4-53c4p4-52I1+L1+E1/16/19/5+H1/19/5p4-5c4p4-5I1+L1+E1/16/19/5+H1/19/5p4-5c4p4-5I1+L1+E1/16/19/5+H1/19/5p4-5c4p4-52I1+L1+E1/16/19/5+H1/19/5p4-5c4p4-52I1+L1+E1/16/19/5+H1/19/5p4-5c4p4-5I1+L1+E1/16/19/5+H1/19/5p4-5c4p4-5I1+L1+E1/16/19/5+H1/19/5p4-5c4p4-52I1+L1+E1/16/19/5+H1/19/5p4-5c4p4-5I1+L1+E1/16/19/5+H1/19/5p4-5c4p4-5I1+L1+E1/16/19/5+H1/19/5p4-5c4p4-5I1+L1+E1/16/19/5+H1/19/5p4-52c4p4-53I1+L1+E1/16/19/5+H1/19/5p4-5c4p4-53c5I1+L1+E1/16/19/5+H1/19/52p4-5c4p4-5c5I1+L1+E1/16/19/5+H1/19/52p4-5c4p4-52c4p4-52c4p4-5I1+L1+E1/16/19/5+H1/19/5p4-5c4p4-5I1+L1+E1/16/19/5+H1/19/5p4-5c4p4-5I1+L1+E1/16/19/5+H1/19/5p4-5c4p4-52c4p4-52c4p4-5I1+L1+E1/16/19/5+H1/19/5p4-5c4p4-52c4p4-52c4p4-5c4p4-52c4p4-5I1+L1+E1/16/19/5+H1/19/5p4-5c4p4-5I1+L1+E1/16/19/5+H1/19/5p4-5c4p4-5I1+L1+E1/16/19/5+H1/19/5p4-5c4p4-5I1+L1+E1/16/19/5+H1/19/5p4-5c4p4-5I1+L1+E1/16/19/5+H1/19/5p4-5c4p4-52c4p4-52c4p4-52c4p4-5I1+L1+E1/16/19/5+H1/19/5p4-5c4p4-52c4p4-5I1+L1+E1/16/19/5+H1/19/5p4-5c4p4-52c4p4-5I1+L1+E1/16/19/5+H1/19/5p4-5c4p4-5I1+L1+E1/16/19/5+H1/19/5c4p4-5I1+L1+E1/16/19/5+H1/19/5p4-5c4p4-53c4p4-5I1+L1+E1/16/19/5+H1/19/5p4-53c4p4-5I1+L1+E1/16/19/5+H1/19/5p4-53c4p4-5I1+L1+E1/16/19/5+H1/19/5p4-53c4p4-5I1+L1+E1/16/19/5+H1/19/5p4-53c4p4-5I1+L1+E1/16/19/5+H1/19/5p4-53c4p4-5I1+L1+E1/16/19/5+H1/19/5p4-53c4p4-5I1+L1+E1/16/19/5+H1/19/5p4-53c4p4-5I1+L1+E1/16/19/5+H1/19/5p4-53c4p4-5I1+L1+E1/16/19/5+H1/19/5p4-53c4p4-52c4p4-5I1+L1+E1/16/19/5+H1/19/5p4-5c4p4-5I1+L1+E1/16/19/5+H1/19/5p4-5c4p4-5I1+L1+E1/16/19/5+H1/19/5p4-5c4p4-5I1+L1+E1/16/19/5+H1/19/5p4-5c4p4-5I1+L1+E1/16/19/5+H1/19/5p4-53I1+L1+E1/16/19/5+H1/19/5p4-5c4p4-52c4p4-5I1+L1+E1/16/19/5+H1/19/5p4-5c4p4-5I1+L1+E1/16/19/5+H1/19/5p4-5c4p4-5I1+L1+E1/16/19/5+H1/19/5p4-5c4p4-5I1+L1+E1/16/19/5+H1/19/5p4-53I1+L1+E1/16/19/5+H1/19/5p4-5c4p4-5I1+L1+E1/16/19/5+H1/19/5p4-53c4p4-5I1+L1+E1/16/19/5+H1/19/5p4-53I1+L1+E1/16/19/5+H1/19/5p4-5c4p4-5I1+L1+E1/16/19/5+H1/19/5p4-52c4p4-5I1+L1+E1/16/19/5+H1/19/5p4-5c4p4-5I1+L1+E1/16/19/5+H1/19/5p4-5c4D1/19/5+P1+F1/19+G1/19/5+V1/19.1I1+L1+E1/16/19/5+H1/19/5p4-5c4I1+L1+E1/16/19/5+H1/19/5p4-5I1+L1+E1/16/19/5+H1/19/5p4-6p2-5I1+L1+E1/16/19/5+H1/19/5p4-52I1+L1+E1/16/19/5+H1/19/5p3-5c4p4-52c4p4-5I1+L1+E1/16/19/5+H1/19/5p4-52I1+L1+E1/16/19/5+H1/19/5p3-5I1+L1+E1/16/19/5+H1/19/5p4-5c4p4-52c4p4-5I1+L1+E1/16/19/5+H1/19/5p4-5c4p4-5I1+L1+E1/16/19/5+H1/19/5p4-52I1+L1+E1/16/19/5+H1/19/5p3-5I1+L1+E1/16/19/5+H1/19/5p4-5c4p4-52c4p4-5I1+L1+E1/16/19/5+H1/19/5p4-5c4p4-5I1+L1+E1/16/19/5+H1/19/5p4-5c4D1/19/5+P1+F1/19+G1/19/5+V1/19.1I1+L1+E1/16/19/5+H1/19/5p4-5c4p4-5I1+L1+E1/16/19/5+H1/19/5p4-52c4p4-5I1+L1+E1/16/19/5+H1/19/5p4-52I1+L1+E1/16/19/5+H1/19/5p3-5I1+L1+E1/16/19/5+H1/19/5p4-5c4p4-52I1+L1+E1/16/19/5+H1/19/5p4-5c4p4-52c4p4-5I1+L1+E1/16/19/5+H1/19/5p4-52I1+L1+E1/16/19/5+H1/19/5p3-5I1+L1+E1/16/19/5+H1/19/5p4-5c4p4-5I1+L1+E1/16/19/5+H1/19/52p4-5c4p4-53I1+L1+E1/16/19/5+H1/19/5p3-5I1+L1+E1/16/19/5+H1/19/5c4p4-52c42p4-5I1+L1+E1/16/19/5+H1/19/5p4-5c4p4-5I1+L1+E1/16/19/5+H1/19/5p4-5c4p4-5I1+L1+E1/16/19/5+H1/19/5p4-5c4p4-5I1+L1+E1/16/19/5+H1/19/5p4-52c4p4-5I1+L1+E1/16/19/5+H1/19/5p4-5D1/19/5+P1+F1/19+G1/19/5+V1/19.1I1+L1+E1/16/19/5+H1/19/5p4-52c4p4-5I1+L1+E1/16/19/5+H1/19/5p4-5D1/19/5+P1+F1/19+G1/19/5+V1/19.1I1+L1+E1/16/19/5+H1/19/5p4-5c4p4-53c4p4-5I1+L1+E1/16/19/5+H1/19/5p4-54I1+L1+E1/16/19/5+H1/19/5p3-5I1+L1+E1/16/19/5+H1/19/5c4p4-52c4p4-6I1+L1+E1/16/19/5+H1/19/52p4-5c4p4-5I1+L1+E1/16/19/5+H1/19/5p4-5c4p4-5I1+L1+E1/16/19/5+H1/19/5p4-5c4p4-5I1+L1+E1/16/19/5+H1/19/5p4-52c4p4-5I1+L1+E1/16/19/5+H1/19/5p4-5D1/19/5+P1+F1/19+G1/19/5+V1/19.1I1+L1+E1/16/19/5+H1/19/5p4-52c4p4-5I1+L1+E1/16/19/5+H1/19/5p4-5D1/19/5+P1+F1/19+G1/19/5+V1/19.1I1+L1+E1/16/19/5+H1/19/5p4-5c4p4-53c4p4-5I1+L1+E1/16/19/5+H1/19/5p4-5c4p4-5I1+L1+E1/16/19/5+H1/19/5p4-5c4p4-5I1+L1+E1/16/19/5+H1/19/5p4-5c4p4-5I1+L1+E1/16/19/5+H1/19/5p4-52c4p4-5I1+L1+E1/16/19/5+H1/19/5p4-5D1/19/5+P1+F1/19+G1/19/5+V1/19.1I1+L1+E1/16/19/5+H1/19/5p4-5c4p4-53c4I1+L1+E1/16/19/5+H1/19/5p4-5I1+L1+E1/16/19/5+H1/19/5c4p4-5I1+L1+E1/16/19/5+H1/19/5p4-5c4p4-5I1+L1+E1/16/19/5+H1/19/5p4-52c4p4-5I1+L1+E1/16/19/5+H1/19/5p4-5D1/19/5+P1+F1/19+G1/19/5+V1/19.1I1+L1+E1/16/19/5+H1/19/5p4-5c4p4-53c4p4-52I1+L1+E1/16/19/5+H1/19/5p4-5c4p4-5I1+L1+E1/16/19/5+H1/19/5p4-5c4p4-5I1+L1+E1/16/19/5+H1/19/5p4-5c4p4-52I1+L1+E1/16/19/5+H1/19/5p4-5c4p4-52I1+L1+E1/16/19/5+H1/19/5p4-5c4p4-5I1+L1+E1/16/19/5+H1/19/5p4-5c4p4-5I1+L1+E1/16/19/5+H1/19/5p4-5c4p4-52I1+L1+E1/16/19/5+H1/19/5p4-5c4p4-5I1+L1+E1/16/19/5+H1/19/5p4-5c4p4-5I1+L1+E1/16/19/5+H1/19/5p4-5c4p4-5I1+L1+E1/16/19/5+H1/19/5p4-52c4p4-5I1+L1+E1/16/19/5+H1/19/5p4-5D1/19/5+P1+F1/19+G1/19/5+V1/19.1I1+L1+E1/16/19/5+H1/19/5p4-5c4p4-5I1+L1+E1/16/19/5+H1/19/5p4-5D1/19/5+P1+F1/19+G1/19/5+V1/19.1c6p4-52c4p4-52I1+L1+E1/16/19/5+H1/19/5p4-5c4p4-5I1+L1+E1/16/19/5+H1/19/5p4-5c4p4-5I1+L1+E1/16/19/5+H1/19/5p4-5c4p4-52I1+L1+E1/16/19/5+H1/19/5p4-5c4p4-52I1+L1+E1/16/19/5+H1/19/5p4-5c4p4-5I1+L1+E1/16/19/5+H1/19/5p4-52I1+L1+E1/16/19/5+H1/19/5p4-5c4p4-5I1+L1+E1/16/19/5+H1/19/5p4-5c4p4-52I1+L1+E1/16/19/5+H1/19/5p4-5c4p4-52I1+L1+E1/16/19/5+H1/19/5p4-5c4p4-5I1+L1+E1/16/19/5+H1/19/5p4-5c4p4-5I1+L1+E1/16/19/5+H1/19/5p4-53I1+L1+E1/16/19/5+H1/19/52c4p4-5I1+L1+E1/16/19/5+H1/19/5p4-52c4p4-53I1+L1+E1/16/19/5+H1/19/5p4-5c4p4-53c5I1+L1+E1/16/19/5+H1/19/52p4-5c4p4-5I1+L1+E1/16/19/5+H1/19/5p4-52c4p4-5I1+L1+E1/16/19/5+H1/19/5p4-52c4p4-5I1+L1+E1/16/19/5+H1/19/5p4-5c4p4-5I1+L1+E1/16/19/5+H1/19/5p4-5c4p4-52c4p4-52c4p4-5I1+L1+E1/16/19/5+H1/19/5p4-5c4p4-52c4p4-5I1+L1+E1/16/19/5+H1/19/52c4p4-5I1+L1+E1/16/19/5+H1/19/5c4p4-5I1+L1+E1/16/19/5+H1/19/5p4-5c4p4-53c4p4-5I1+L1+E1/16/19/5+H1/19/5p4-53c4D1/19/5+P1+F1/19+G1/19/5+V1/19.1I1+L1+E1/16/19/5+H1/19/5p4-53c4p4-5I1+L1+E1/16/19/5+H1/19/5p4-53c4p4-5I1+L1+E1/16/19/5+H1/19/5p4-53c4p4-5I1+L1+E1/16/19/5+H1/19/5p4-53c4p4-5I1+L1+E1/16/19/5+H1/19/5p4-53c4p4-5I1+L1+E1/16/19/5+H1/19/5p4-53c4p4-5I1+L1+E1/16/19/5+H1/19/5p4-53c4p4-5I1+L1+E1/16/19/5+H1/19/5p4-53c4p4-52c4p4-5I1+L1+E1/16/19/5+H1/19/5p4-5c4p4-5I1+L1+E1/16/19/5+H1/19/5p4-5c4p4-5I1+L1+E1/16/19/5+H1/19/5p4-5c4p4-5I1+L1+E1/16/19/5+H1/19/5p4-5c4p4-5I1+L1+E1/16/19/5+H1/19/5p4-53I1+L1+E1/16/19/5+H1/19/5p4-5c4p4-52c4p4-5I1+L1+E1/16/19/5+H1/19/5p4-5c4p4-5I1+L1+E1/16/19/5+H1/19/5p4-5c4p4-5I1+L1+E1/16/19/5+H1/19/5p4-5c4p4-5I1+L1+E1/16/19/5+H1/19/5p4-53I1+L1+E1/16/19/5+H1/19/5p4-5c4p4-5I1+L1+E1/16/19/5+H1/19/5p4-52I1+L1+E1/16/19/5+H1/19/5c4p4-5I1+L1+E1/16/19/5+H1/19/5p4-53I1+L1+E1/16/19/5+H1/19/5p4-5c4p4-5I1+L1+E1/16/19/5+H1/19/5p4-52c4p4-5I1+L1+E1/16/19/5+H1/19/5p4-5c4p4-5I1+L1+E1/16/19/5+H1/19/5p4-52I1+L1+E1/16/19/5+H1/19/5c4p4-5I1+L1+E1/16/19/5+H1/19/5p4-5c4p4-5I1+L1+E1/16/19/5+H1/19/5p4-53c4D1/19/5+P1+F1/19+G1/19/5+V1/19.1I1+L1+E1/16/19/5+H1/19/5p4-5c4p4-5I1+L1+E1/16/19/5+H1/19/5p4-5c4D1/19/5+P1+F1/19+G1/19/5+V1/19.1I1+L1+E1/16/19/5+H1/19/5p4-52I1+L1+E1/16/19/5+H1/19/5c4p4-53c4p4-5I1+L1+E1/16/19/5+H1/19/5c4p4-5I1+L1+E1/16/19/5+H1/19/5p4-5c3p3-5c4p4-5I1+L1+E1/16/19/5+H1/19/5p4-52c4p4-5I1+L1+E1/16/19/5+H1/19/5p4-52I1+L1+E1/16/19/5+H1/19/5p4-5c4I1+L1+E1/16/19/5+H1/19/5c4p4-5I1+L1+E1/16/19/5+H1/19/5c4p4-5I1+L1+E1/16/19/5+H1/19/5p4-52I1+L1+E1/16/19/5+H1/19/5p4-53I1+L1+E1/16/19/5+H1/19/5p4-5c4p4-5I1+L1+E1/16/19/5+H1/19/5p4-5c4p4-52I1+L1+E1/16/19/5+H1/19/5p4-52I1+L1+E1/16/19/5+H1/19/5p4-5p5-3p2-5p4-5I1+L1+E1/16/19/5+H1/19/5c4p4-5I1+L1+E1/16/19/5+H1/19/5p4-5c4p4-5I1+L1+E1/16/19/5+H1/19/5c4p4-5I1+L1+E1/16/19/5+H1/19/5p4-52I1+L1+E1/16/19/5+H1/19/5p4-53I1+L1+E1/16/19/5+H1/19/5p4-5c4p4-5I1+L1+E1/16/19/5+H1/19/5p4-5c4p4-52I1+L1+E1/16/19/5+H1/19/5p4-52I1+L1+E1/16/19/5+H1/19/5p4-5c5I1+L1+E1/16/19/5+H1/19/5p4-5I1+L1+E1/16/19/5+H1/19/5c4p4-5I1+L1+E1/16/19/5+H1/19/5p4-5c4I1+L1+E1/16/19/5+H1/19/5p4-52I1+L1+E1/16/19/5+H1/19/5p4-5c4D1/19/5+P1+F1/19+G1/19/5+V1/19.1I1+L1+E1/16/19/5+H1/19/5p4-52I1+L1+E1/16/19/5+H1/19/5c42D1/19/5+P1+F1/19+G1/19/5+V1/19.1I1+L1+E1/16/19/5+H1/19/5p4-52I1+L1+E1/16/19/5+H1/19/5c42p4-52c42p4-52I1+L1+E1/16/19/5+H1/19/5c4p4-5I1+L1+E1/16/19/5+H1/19/5p4-54I1+L1+E1/16/19/5+H1/19/5p4-5c4D1/19/5+P1+F1/19+G1/19/5+V1/19.1I1+L1+E1/16/19/5+H1/19/5p4-53c42p4-5c4I1+L1+E1/16/19/5+H1/19/5p4-54I1+L1+E1/16/19/5+H1/19/5p4-5c4D1/19/5+P1+F1/19+G1/19/5+V1/19.1I1+L1+E1/16/19/5+H1/19/5p4-53c42D1/19/5+P1+F1/19+G1/19/5+V1/19.1I1+L1+E1/16/19/5+H1/19/5p4-54I1+L1+E1/16/19/5+H1/19/52p4-5c4p4-52c4p4-5I1+L1+E1/16/19/5+H1/19/5c4p4-52I1+L1+E1/16/19/5+H1/19/5c4D1/19/5+P1+F1/19+G1/19/5+V1/19.1c4I1+L1+E1/16/19/5+H1/19/5c5I1+L1+E1/16/19/5+H1/19/5p4-5I1+L1+E1/16/19/5+H1/19/5p4-52I1+L1+E1/16/19/5+H1/19/52p4-5c4p4-52c4p4-5I1+L1+E1/16/19/5+H1/19/5c4p4-52I1+L1+E1/16/19/5+H1/19/5c4D1/19/5+P1+F1/19+G1/19/5+V1/19.1c4I1+L1+E1/16/19/5+H1/19/5c5I1+L1+E1/16/19/5+H1/19/5p4-5I1+L1+E1/16/19/5+H1/19/5c4I1+L1+E1/16/19/5+H1/19/5p4-5c4D1/19/5+P1+F1/19+G1/19/5+V1/19.1I1+L1+E1/16/19/5+H1/19/5p4-53c4D1/19/5+P1+F1/19+G1/19/5+V1/19.1I1+L1+E1/16/19/5+H1/19/5p4-52I1+L1+E1/16/19/5+H1/19/5p4-5I1+L1+E1/16/19/5+H1/19/52p4-5c4p4-52c4p4-5D1/19/5+P1+F1/19+G1/19/5+V1/19.1I1+L1+E1/16/19/5+H1/19/5p4-5c4p4-5I1+L1+E1/16/19/5+H1/19/5p4-53I1+L1+E1/16/19/5+H1/19/5p4-52I1+L1+E1/16/19/5+H1/19/5p4-5c4p4-53c4p4-5I1+L1+E1/16/19/5+H1/19/5p4-5I1+L1+E1/16/19/5+H1/19/5c4D1/19/5+P1+F1/19+G1/19/5+V1/19.1c4p4-5c5I1+L1+E1/16/19/5+H1/19/5D1/19/5+P1+F1/19+G1/19/5+V1/19.1I1+L1+E1/16/19/5+H1/19/5c4I1+L1+E1/16/19/5+H1/19/5p4-52I1+L1+E1/16/19/5+H1/19/5p4-5c4D1/19/5+P1+F1/19+G1/19/5+V1/19.1I1+L1+E1/16/19/5+H1/19/52p4-52c4D1/19/5+P1+F1/19+G1/19/5+V1/19.1c6p4-54I1+L1+E1/16/19/5+H1/19/5p4-5c4D1/19/5+P1+F1/19+G1/19/5+V1/19.1I1+L1+E1/16/19/5+H1/19/5p4-53c42I1+L1+E1/16/19/5+H1/19/5p4-5I1+L1+E1/16/19/5+H1/19/53c4p4-55I1+L1+E1/16/19/5+H1/19/5p4-5c4D1/19/5+P1+F1/19+G1/19/5+V1/19.1I1+L1+E1/16/19/5+H1/19/5p4-53c42I1+L1+E1/16/19/5+H1/19/5p4-5I1+L1+E1/16/19/5+H1/19/53c4p4-5I1+L1+E1/16/19/5+H1/19/5p4-5c4p4-5I1+L1+E1/16/19/5+H1/19/5p4-5I1+L1+E1/16/19/5+H1/19/5p4-5c4p4-5I1+L1+E1/16/19/5+H1/19/5p4-52I1+L1+E1/16/19/5+H1/19/5p4-5D1/19/5+P1+F1/19+G1/19/5+V1/19.1p4-52I1+L1+E1/16/19/5+H1/19/5c4p4-5I1+L1+E1/16/19/5+H1/19/5p4-5c4p4-54I1+L1+E1/16/19/5+H1/19/5p4-5c4p4-5I1+L1+E1/16/19/5+H1/19/52c5I1+L1+E1/16/19/5+H1/19/5p2-5p4-52I1+L1+E1/16/19/5+H1/19/52c4p4-54c4I1+L1+E1/16/19/5+H1/19/5D1/19/5+P1+F1/19+G1/19/5+V1/19.1c6I1+L1+E1/16/19/5+H1/19/52p4-5p2-4p1-5I1+L1+E1/16/19/5+H1/19/5p4-5I1+L1+E1/16/19/5+H1/19/5p4-5c4p4-53I1+L1+E1/16/19/5+H1/19/52D1/19/5+P1+F1/19+G1/19/5+V1/19.1p1-5c4D1/19/5+P1+F1/19+G1/19/5+V1/19.1I1+L1+E1/16/19/5+H1/19/5p4-52D1/19/5+P1+F1/19+G1/19/5+V1/19.1p1-5p4-5c4D1/19/5+P1+F1/19+G1/19/5+V1/19.1I1+L1+E1/16/19/5+H1/19/5p4-5I1+L1+E1/16/19/5+H1/19/5p4-5c4p4-53c4p4-55c4p4-5I1+L1+E1/16/19/5+H1/19/5p4-52c4p4-53c4p4-53c4p4-53c4p4-53c4p4-5I1+L1+E1/16/19/5+H1/19/5p4-5I1+L1+E1/16/19/5+H1/19/5p4-5c4p4-53c4p4-54c4p4-53D1/19/5+P1+F1/19+G1/19/5+V1/19.1p1-5p4-5c4p4-5I1+L1+E1/16/19/5+H1/19/5p4-52D1/19/5+P1+F1/19+G1/19/5+V1/19.1p1-5p4-5c4p4-5I1+L1+E1/16/19/5+H1/19/5p4-5I1+L1+E1/16/19/5+H1/19/5p4-5c4p4-5I1+L1+E1/16/19/5+H1/19/5p4-5I1+L1+E1/16/19/5+H1/19/5p4-5c4p4-52c4p4-5I1+L1+E1/16/19/5+H1/19/5p4-52c4p4-53c4p4-52c4p4-5I1+L1+E1/16/19/5+H1/19/5p4-52c4p4-53c4p4-53c4p4-53c4p4-53c4p4-5I1+L1+E1/16/19/5+H1/19/5p4-5I1+L1+E1/16/19/5+H1/19/5p4-5c4p4-53c4p4-53c4p4-54c4p4-53c4p4-53c4p4-53c4p4-5I1+L1+E1/16/19/5+H1/19/52p4-52c4p4-53c4p4-5I1+L1+E1/16/19/5+H1/19/5p4-53c4p4-5I1+L1+E1/16/19/5+H1/19/5p4-54c4p4-53c4p4-5I1+L1+E1/16/19/5+H1/19/5p4-53c4p4-5I1+L1+E1/16/19/5+H1/19/5p4-52c4p4-53c4D1/19/5+P1+F1/19+G1/19/5+V1/19.1I1+L1+E1/16/19/5+H1/19/5p4-53c4p4-53c4p4-5I1+L1+E1/16/19/5+H1/19/53p4-53c4p4-53c4p4-5I1+L1+E1/16/19/5+H1/19/5p4-52c4p4-53c4p4-5I1+L1+E1/16/19/5+H1/19/5p4-53c4p4-53c4p4-53c4p4-53c4p4-5I1+L1+E1/16/19/5+H1/19/5p4-53c4p4-5I1+L1+E1/16/19/5+H1/19/5p4-5c42p4-53c4p4-5I1+L1+E1/16/19/5+H1/19/5p4-5c42p4-5I1+L1+E1/16/19/5+H1/19/5p4-52I1+L1+E1/16/19/5+H1/19/52c4p4-5I1+L1+E1/16/19/5+H1/19/5p4-52I1+L1+E1/16/19/5+H1/19/5p4-5c4p4-5I1+L1+E1/16/19/5+H1/19/5p4-52I1+L1+E1/16/19/5+H1/19/5p4-5c4p4-5I1+L1+E1/16/19/5+H1/19/5p4-5I1+L1+E1/16/19/5+H1/19/5c4p4-5I1+L1+E1/16/19/5+H1/19/5p4-54I1+L1+E1/16/19/5+H1/19/5c42p4-53c4D1/19/5+P1+F1/19+G1/19/5+V1/19.1I1+L1+E1/16/19/5+H1/19/5p4-5c4p4-5I1+L1+E1/16/19/5+H1/19/5p4-5c42p4-5I1+L1+E1/16/19/5+H1/19/5p4-52I1+L1+E1/16/19/5+H1/19/52c4p4-5I1+L1+E1/16/19/5+H1/19/5p4-52I1+L1+E1/16/19/5+H1/19/5p4-5c4p4-5I1+L1+E1/16/19/5+H1/19/5p4-53c4p4-52c4p4-5I1+L1+E1/16/19/5+H1/19/5p4-53c4p4-5I1+L1+E1/16/19/5+H1/19/5p4-5c42p4-53c4p4-5I1+L1+E1/16/19/5+H1/19/5p4-5c4p4-5I1+L1+E1/16/19/5+H1/19/5p4-53I1+L1+E1/16/19/5+H1/19/5p4-5c42p4-52c4p4-5I1+L1+E1/16/19/5+H1/19/5p4-5c4p4-5I1+L1+E1/16/19/5+H1/19/5p4-5c4p4-5I1+L1+E1/16/19/5+H1/19/5p4-52I1+L1+E1/16/19/5+H1/19/5p4-5c4p4-5I1+L1+E1/16/19/5+H1/19/5p4-52I1+L1+E1/16/19/5+H1/19/52c4p4-5I1+L1+E1/16/19/5+H1/19/52c4p4-5I1+L1+E1/16/19/5+H1/19/5p4-53I1+L1+E1/16/19/5+H1/19/5p4-52I1+L1+E1/16/19/5+H1/19/5p4-5c4p4-5I1+L1+E1/16/19/5+H1/19/5p4-52c42p4-5I1+L1+E1/16/19/5+H1/19/5p4-53I1+L1+E1/16/19/5+H1/19/5p4-54c4p4-53c4p4-5I1+L1+E1/16/19/5+H1/19/5p4-53c4p4-5I1+L1+E1/16/19/5+H1/19/5p4-53c4p4-53c4p4-5I1+L1+E1/16/19/5+H1/19/5p4-5c4p4-5I1+L1+E1/16/19/5+H1/19/5p4-5c42p4-5I1+L1+E1/16/19/5+H1/19/5p4-52I1+L1+E1/16/19/5+H1/19/52c4p4-5I1+L1+E1/16/19/5+H1/19/5p4-5c42p4-5I1+L1+E1/16/19/5+H1/19/5p4-52I1+L1+E1/16/19/5+H1/19/52c4p4-5I1+L1+E1/16/19/5+H1/19/5p4-5I1+L1+E1/16/19/5+H1/19/5p4-5I1+L1+E1/16/19/5+H1/19/5p4-5c4p4-5I1+L1+E1/16/19/5+H1/19/52c4p4-5I1+L1+E1/16/19/5+H1/19/5p4-5I1+L1+E1/16/19/5+H1/19/5c4p4-5I1+L1+E1/16/19/5+H1/19/5p4-5c4p4-5c4p4-5I1+L1+E1/16/19/5+H1/19/5p4-5c4p4-5I1+L1+E1/16/19/5+H1/19/5c4D1/19/5+P1+F1/19+G1/19/5+V1/19.1I1+L1+E1/16/19/5+H1/19/5p4-5c5I1+L1+E1/16/19/5+H1/19/52c4p4-5c4p4-5I1+L1+E1/16/19/5+H1/19/5c4p4-5I1+L1+E1/16/19/5+H1/19/5p4-52c4p4-5I1+L1+E1/16/19/5+H1/19/5p4-5c4p4-5I1+L1+E1/16/19/5+H1/19/5p4-5c5I1+L1+E1/16/19/5+H1/19/52c4p4-5c4p4-5I1+L1+E1/16/19/5+H1/19/5c4p4-5I1+L1+E1/16/19/5+H1/19/5p4-52c4p4-5I1+L1+E1/16/19/5+H1/19/5p4-53c4p4-5I1+L1+E1/16/19/5+H1/19/5p4-52c4p4-5I1+L1+E1/16/19/5+H1/19/5c4p4-5I1+L1+E1/16/19/5+H1/19/5p4-5c4p4-5I1+L1+E1/16/19/5+H1/19/5c4p4-52I1+L1+E1/16/19/5+H1/19/5p4-53I1+L1+E1/16/19/5+H1/19/5c4p4-52I1+L1+E1/16/19/5+H1/19/5p4-52c4p4-5I1+L1+E1/16/19/5+H1/19/5c4I1+L1+E1/16/19/5+H1/19/5c4p4-5I1+L1+E1/16/19/5+H1/19/5c4p4-5I1+L1+E1/16/19/5+H1/19/5p4-53D1/19/5+P1+F1/19+G1/19/5+V1/19.1c6I1+L1+E1/16/19/5+H1/19/5p4-53c4p4-5I1+L1+E1/16/19/5+H1/19/5p4-54c4p4-5I1+L1+E1/16/19/5+H1/19/5p4-5c4p4-2p4-5I1+L1+E1/16/19/5+H1/19/5p4-5c4D1/19/5+P1+F1/19+G1/19/5+V1/19.1I1+L1+E1/16/19/5+H1/19/5p4-5c4p4-5I1+L1+E1/16/19/5+H1/19/5c4D1/19/5+P1+F1/19+G1/19/5+V1/19.1I1+L1+E1/16/19/5+H1/19/5p4-52c4p4-52c4p4-5I1+L1+E1/16/19/5+H1/19/5c4p4-5I1+L1+E1/16/19/5+H1/19/5p4-52c4p4-5I1+L1+E1/16/19/5+H1/19/5p4-54c4p4-5I1+L1+E1/16/19/5+H1/19/5p4-5c4p4-5I1+L1+E1/16/19/5+H1/19/5c4p4-5D1/19/5+P1+F1/19+G1/19/5+V1/19.1c4p4-5I1+L1+E1/16/19/5+H1/19/53c4p4-5I1+L1+E1/16/19/5+H1/19/5c4p4-5I1+L1+E1/16/19/5+H1/19/5c4D1/19/5+P1+F1/19+G1/19/5+V1/19.1I1+L1+E1/16/19/5+H1/19/53p4-5I1+L1+E1/16/19/5+H1/19/5c4p4-54I1+L1+E1/16/19/5+H1/19/5p4-53c4D1/19/5+P1+F1/19+G1/19/5+V1/19.1p1-5p4-5c4p4-5I1+L1+E1/16/19/5+H1/19/5c4I1+L1+E1/16/19/5+H1/19/52p4-5c4p4-52I1+L1+E1/16/19/5+H1/19/5c4p4-5I1+L1+E1/16/19/5+H1/19/5c4p4-52D1/19/5+P1+F1/19+G1/19/5+V1/19.1I1+L1+E1/16/19/5+H1/19/5p4-5I1+L1+E1/16/19/5+H1/19/5c4p4-5c4p4-5I1+L1+E1/16/19/5+H1/19/5c4I1+L1+E1/16/19/5+H1/19/52p4-5c4p4-52I1+L1+E1/16/19/5+H1/19/5c4p4-5I1+L1+E1/16/19/5+H1/19/5c4p4-52D1/19/5+P1+F1/19+G1/19/5+V1/19.1I1+L1+E1/16/19/5+H1/19/5p4-52D1/19/5+P1+F1/19+G1/19/5+V1/19.1I1+L1+E1/16/19/5+H1/19/52p4-5I1+L1+E1/16/19/5+H1/19/5c4p4-57c4p4-58c4p4-53c4p4-5I1+L1+E1/16/19/5+H1/19/5c4p4-5I1+L1+E1/16/19/5+H1/19/5p4-5c4p4-52I1+L1+E1/16/19/5+H1/19/5c4p4-52I1+L1+E1/16/19/5+H1/19/5c4p4-5I1+L1+E1/16/19/5+H1/19/5c5I1+L1+E1/16/19/5+H1/19/5p4-510c4p4-58c4p4-53c4p4-52I1+L1+E1/16/19/5+H1/19/5p4-55c4p4-53c4p4-58c4p4-56I1+L1+E1/16/19/5+H1/19/5c4p4-56D1/19/5+P1+F1/19+G1/19/5+V1/19.1c6p4-5I1+L1+E1/16/19/5+H1/19/5p4-513c4p4-56I1+L1+E1/16/19/5+H1/19/5c4p4-58c4p4-52I1+L1+E1/16/19/5+H1/19/5p4-56c4p4-55c4p4-5I1+L1+E1/16/19/5+H1/19/5p4-5c5I1+L1+E1/16/19/5+H1/19/5p4-54c4p4-58c4p4-52I1+L1+E1/16/19/5+H1/19/5p4-52c4p4-52I1+L1+E1/16/19/5+H1/19/5p4-56c4p4-58c4p4-52I1+L1+E1/16/19/5+H1/19/5c4p4-52I1+L1+E1/16/19/5+H1/19/5p4-52c4p4-5I1+L1+E1/16/19/5+H1/19/5p4-5I1+L1+E1/16/19/5+H1/19/52p4-5c4p4-5I1+L1+E1/16/19/5+H1/19/5c4p4-5I1+L1+E1/16/19/5+H1/19/5c4p4-53I1+L1+E1/16/19/5+H1/19/5p4-54c4p4-54I1+L1+E1/16/19/5+H1/19/5p4-5I1+L1+E1/16/19/5+H1/19/5c4p4-52I1+L1+E1/16/19/5+H1/19/5p4-5I1+L1+E1/16/19/5+H1/19/5p4-53c4p4-53I1+L1+E1/16/19/5+H1/19/5p4-5I1+L1+E1/16/19/5+H1/19/5c4p4-54I1+L1+E1/16/19/5+H1/19/5c4p4-55c5I1+L1+E1/16/19/5+H1/19/5p4-5c5I1+L1+E1/16/19/5+H1/19/5p4-55c5I1+L1+E1/16/19/5+H1/19/5p4-54c4p4-54I1+L1+E1/16/19/5+H1/19/5p4-52I1+L1+E1/16/19/5+H1/19/5p4-5c4p4-53I1+L1+E1/16/19/5+H1/19/5c5I1+L1+E1/16/19/5+H1/19/52p4-52c4p4-52I1+L1+E1/16/19/5+H1/19/5p4-5I1+L1+E1/16/19/5+H1/19/5p4-5c4p4-53I1+L1+E1/16/19/5+H1/19/5p4-52I1+L1+E1/16/19/5+H1/19/5c5I1+L1+E1/16/19/5+H1/19/5D1/19/5+P1+F1/19+G1/19/5+V1/19.1c6p4-52c4p4-55c4p4-55c4p4-5I1+L1+E1/16/19/5+H1/19/52p4-5I1+L1+E1/16/19/5+H1/19/5c5I1+L1+E1/16/19/5+H1/19/5c5I1+L1+E1/16/19/5+H1/19/5p4-52c4p4-5c4p4-5c4c6I1+L1+E1/16/19/5+H1/19/5c4p4-54I1+L1+E1/16/19/5+H1/19/5c4p4-5I1+L1+E1/16/19/5+H1/19/5p4-5c4p4-5I1+L1+E1/16/19/5+H1/19/5p4-52c4p4-5I1+L1+E1/16/19/5+H1/19/5p4-5c4p4-5I1+L1+E1/16/19/5+H1/19/5p4-52c4p4-54D1/19/5+P1+F1/19+G1/19/5+V1/19.1c6I1+L1+E1/16/19/5+H1/19/5p4-5c4p4-5I1+L1+E1/16/19/5+H1/19/54p4-5p4-6p3-5p4-5c4p4-52p4-6p3-5p4-5c42p4-54I1+L1+E1/16/19/5+H1/19/5c4p4-5I1+L1+E1/16/19/5+H1/19/5p4-5c4p4-5I1+L1+E1/16/19/5+H1/19/5p4-52c4p4-52c4p4-52I1+L1+E1/16/19/5+H1/19/52p4-5c4p4-5I1+L1+E1/16/19/5+H1/19/52p4-5c4p4-5I1+L1+E1/16/19/5+H1/19/52p4-5c4p4-5I1+L1+E1/16/19/5+H1/19/5p4-5I1+L1+E1/16/19/5+H1/19/5p4-52c4p4-5I1+L1+E1/16/19/5+H1/19/53p4-5c4p4-5I1+L1+E1/16/19/5+H1/19/5p4-5I1+L1+E1/16/19/5+H1/19/52p4-5c4p4-5I1+L1+E1/16/19/5+H1/19/5p4-52c4p4-5I1+L1+E1/16/19/5+H1/19/53p4-5c4p4-5I1+L1+E1/16/19/5+H1/19/5p4-52c4p4-5I1+L1+E1/16/19/5+H1/19/53p4-5c4p4-5I1+L1+E1/16/19/5+H1/19/5p4-52c4p4-5I1+L1+E1/16/19/5+H1/19/52p4-5c5I1+L1+E1/16/19/5+H1/19/52p4-52c4p4-5I1+L1+E1/16/19/5+H1/19/52p4-5c5I1+L1+E1/16/19/5+H1/19/5p4-53c4p4-52c4p4-5c4p4-5I1+L1+E1/16/19/5+H1/19/5p4-52c-3I1+L1+E1/16/19/5+H1/19/5'p-5--42c-5p-5--4c-5p-5--43I1+L1+E1/16/19/5+H1/19/5'2p-5--44c-5p-5--4c-5p-5--43I1+L1+E1/16/19/5+H1/19/5'2p-5--44c-5p-5--4c-5p-5--42I1+L1+E1/16/19/5+H1/19/5'p-5--4I1+L1+E1/16/19/5+H1/19/5'p-5--44I1+L1+E1/16/19/5+H1/19/5'p-2--4I1+L1+E1/16/19/5+H1/19/5'p-5--4c-52I1+L1+E1/16/19/5+H1/19/5'p-5--42I1+L1+E1/16/19/5+H1/19/5'p-5--4I1+L1+E1/16/19/5+H1/19/5'p-5--4I1+L1+E1/16/19/5+H1/19/5'c-5p-5--42I1+L1+E1/16/19/5+H1/19/5'p-5--4c-5I1+L1+E1/16/19/5+H1/19/5'p-5--42c-5I1+L1+E1/16/19/5+H1/19/5'3p-5--4c-5p-5--4I1+L1+E1/16/19/5+H1/19/5'p-5--4I1+L1+E1/16/19/5+H1/19/5'p-5--42c-5p-5--4I1+L1+E1/16/19/5+H1/19/5'2p-5--42I1+L1+E1/16/19/5+H1/19/5'c-5I1+L1+E1/16/19/5+H1/19/5'c-5I1+L1+E1/16/19/5+H1/19/5'c-5p-5--42c-5p-5--43c-5p-5--42c-5p-5--42c-5p-5--42c-5p-5--42I1+L1+E1/16/19/5+H1/19/5'p-5--4I1+L1+E1/16/19/5+H1/19/5'p-5--4c-5I1+L1+E1/16/19/5+H1/19/5'p-5--42I1+L1+E1/16/19/5+H1/19/5'c-5I1+L1+E1/16/19/5+H1/19/5'3p-5--4c-5I1+L1+E1/16/19/5+H1/19/5'2p-5--4I1+L1+E1/16/19/5+H1/19/5'c-52I1+L1+E1/16/19/5+H1/19/5'c-5p-5--43c-5p-5--4c-5p-5--4I1+L1+E1/16/19/5+H1/19/5'p-5--4I1+L1+E1/16/19/5+H1/19/5'p-5--4c-5p-5--4I1+L1+E1/16/19/5+H1/19/5'p-5--4c-5p-5--4c-5I1+L1+E1/16/19/5+H1/19/5'2p-5--4I1+L1+E1/16/19/5+H1/19/5'p-5--4I1+L1+E1/16/19/5+H1/19/5'p-5--4c-5p-5--4I1+L1+E1/16/19/5+H1/19/5'p-5--43c-5I1+L1+E1/16/19/5+H1/19/5'p-5--4c-5p-5--43I1+L1+E1/16/19/5+H1/19/5'2c-5p-5--4I1+L1+E1/16/19/5+H1/19/5'p-5--42I1+L1+E1/16/19/5+H1/19/5'3c-5p-5--4I1+L1+E1/16/19/5+H1/19/5'p-5--43I1+L1+E1/16/19/5+H1/19/5'2c-5p-5--4I1+L1+E1/16/19/5+H1/19/5'p-5--43c-5p-5--4c-5p-5--4c-52p-5--4I1+L1+E1/16/19/5+H1/19/5'p-5--4I1+L1+E1/16/19/5+H1/19/5'p-5--4c-52p-5--4c-5p-5--4c-5p-5--42I1+L1+E1/16/19/5+H1/19/5'p-5--44c-5p-5--4c-5p-5--4I1+L1+E1/16/19/5+H1/19/5'p-5--4I1+L1+E1/16/19/5+H1/19/5'p-5--4I1+L1+E1/16/19/5+H1/19/5'p-5--44c-5p-5--4c-4D1/19/5+P1+F1/19+G1/19/5+V1/19.1'I1+L1+E1/16/19/5+H1/19/5'p-5--4I1+L1+E1/16/19/5+H1/19/5'3p-5--44c-5p-5--4c-5p-5--4I1+L1+E1/16/19/5+H1/19/5'p-5--4I1+L1+E1/16/19/5+H1/19/5'p-5--4I1+L1+E1/16/19/5+H1/19/5'p-5--42c-5p-5--43c-5p-5--4c-5p-5--4I1+L1+E1/16/19/5+H1/19/5'p-5--4I1+L1+E1/16/19/5+H1/19/5'p-5--4I1+L1+E1/16/19/5+H1/19/5'p-5--42c-5p-5--43c-5p-5--4c-5p-5--4c-5p-5--4I1+L1+E1/16/19/5+H1/19/5'p-5--4c-5p-5--4c-4D1/19/5+P1+F1/19+G1/19/5+V1/19.1'c-4D1/19/5+P1+F1/19+G1/19/5+V1/19.1'I1+L1+E1/16/19/5+H1/19/5'p-5--4c-5p-5--43I1+L1+E1/16/19/5+H1/19/5'D1/19/5+P1+F1/19+G1/19/5+V1/19.1'p-5--42I1+L1+E1/16/19/5+H1/19/5'c-4D1/19/5+P1+F1/19+G1/19/5+V1/19.1'p-5--42I1+L1+E1/16/19/5+H1/19/5'c-52I1+L1+E1/16/19/5+H1/19/5'c-5p-5--42c-5p-5--43I1+L1+E1/16/19/5+H1/19/5'c-5p-5--4I1+L1+E1/16/19/5+H1/19/5'c-5p-5--4I1+L1+E1/16/19/5+H1/19/5'2p-5--42c-5p-5--4I1+L1+E1/16/19/5+H1/19/5'2p-5--4c-5p-5--4I1+L1+E1/16/19/5+H1/19/5'p-5--4c-5p-5--42c-5p-5--43I1+L1+E1/16/19/5+H1/19/5'c-4D1/19/5+P1+F1/19+G1/19/5+V1/19.1'p-5--44I1+L1+E1/16/19/5+H1/19/5'c-4D1/19/5+P1+F1/19+G1/19/5+V1/19.1'p-5--42I1+L1+E1/16/19/5+H1/19/5'c-4D1/19/5+P1+F1/19+G1/19/5+V1/19.1'p-5--4I1+L1+E1/16/19/5+H1/19/5'c-4D1/19/5+P1+F1/19+G1/19/5+V1/19.1'p-5--42I1+L1+E1/16/19/5+H1/19/5'c-5p-5--4I1+L1+E1/16/19/5+H1/19/5'2p-5--4I1+L1+E1/16/19/5+H1/19/5'c-5p-5--4I1+L1+E1/16/19/5+H1/19/5'2p-5--4I1+L1+E1/16/19/5+H1/19/5'c-5I1+L1+E1/16/19/5+H1/19/5'D1/19/5+P1+F1/19+G1/19/5+V1/19.1'p-5--42I1+L1+E1/16/19/5+H1/19/5'c-5p-5--43I1+L1+E1/16/19/5+H1/19/5'c-5p-5--43I1+L1+E1/16/19/5+H1/19/5'c-5p-5--4I1+L1+E1/16/19/5+H1/19/5'c-5p-5--4I1+L1+E1/16/19/5+H1/19/5'c-5p-5--4I1+L1+E1/16/19/5+H1/19/5'c-5p-5--43I1+L1+E1/16/19/5+H1/19/5'c-5p-5--4I1+L1+E1/16/19/5+H1/19/5'p-5--4I1+L1+E1/16/19/5+H1/19/5'c-5p-5--4I1+L1+E1/16/19/5+H1/19/5'3c-5p-5--42I1+L1+E1/16/19/5+H1/19/5'c-5p-5--4I1+L1+E1/16/19/5+H1/19/5'c-5p-5--4I1+L1+E1/16/19/5+H1/19/5'p-5--4I1+L1+E1/16/19/5+H1/19/5'c-5p-5--43I1+L1+E1/16/19/5+H1/19/5'c-4D1/19/5+P1+F1/19+G1/19/5+V1/19.1'p-5--43I1+L1+E1/16/19/5+H1/19/5'c-5p-5--4I1+L1+E1/16/19/5+H1/19/5'p-5--42I1+L1+E1/16/19/5+H1/19/5'c-5I1+L1+E1/16/19/5+H1/19/5'D1/19/5+P1+F1/19+G1/19/5+V1/19.1'p-5--43c-4D1/19/5+P1+F1/19+G1/19/5+V1/19.1'p-5--43I1+L1+E1/16/19/5+H1/19/5'c-5p-5--4I1+L1+E1/16/19/5+H1/19/5'2c-5p-5--43I1+L1+E1/16/19/5+H1/19/5'p-5--4c-5p-5--43I1+L1+E1/16/19/5+H1/19/5'c-5p-5--4I1+L1+E1/16/19/5+H1/19/5'p-5--4I1+L1+E1/16/19/5+H1/19/5'c-5p-5--43I1+L1+E1/16/19/5+H1/19/5'c-5p-5--4I1+L1+E1/16/19/5+H1/19/5'p-5--4I1+L1+E1/16/19/5+H1/19/5'c-5p-5--4I1+L1+E1/16/19/5+H1/19/5'p-5--42I1+L1+E1/16/19/5+H1/19/5'c-5p-5--4I1+L1+E1/16/19/5+H1/19/5'c-5p-5--4I1+L1+E1/16/19/5+H1/19/5'p-5--4I1+L1+E1/16/19/5+H1/19/5'c-4D1/19/5+P1+F1/19+G1/19/5+V1/19.1'I1+L1+E1/16/19/5+H1/19/5'p-5--4I1+L1+E1/16/19/5+H1/19/5'c-5p-5--4I1+L1+E1/16/19/5+H1/19/5'p-5--4I1+L1+E1/16/19/5+H1/19/5'c-5p-5--4I1+L1+E1/16/19/5+H1/19/5'p-5--4I1+L1+E1/16/19/5+H1/19/5'c-5p-5--4I1+L1+E1/16/19/5+H1/19/5'c-5p-5--44I1+L1+E1/16/19/5+H1/19/5'c-5p-5--43c-5p-5--42c-5p-5--42c-5p-5--4I1+L1+E1/16/19/5+H1/19/5'c-5p-5--42c-5p-5--42c-5p-5--47c-5p-5--42c-5p-5--4c-5p-5--42I1+L1+E1/16/19/5+H1/19/5'c-3I1+L1+E1/16/19/5+H1/19/5'c-4D1/19/5+P1+F1/19+G1/19/5+V1/19.1'p-5--42c-5p-5--4I1+L1+E1/16/19/5+H1/19/5'c-4D1/19/5+P1+F1/19+G1/19/5+V1/19.1'p-5--42c-5p-5--4I1+L1+E1/16/19/5+H1/19/5'c-4D1/19/5+P1+F1/19+G1/19/5+V1/19.1'p-5--4I1+L1+E1/16/19/5+H1/19/5'c-4D1/19/5+P1+F1/19+G1/19/5+V1/19.1'p-5--42c-5p-5--4I1+L1+E1/16/19/5+H1/19/5'c-4D1/19/5+P1+F1/19+G1/19/5+V1/19.1'p-5--4I1+L1+E1/16/19/5+H1/19/5'c-4D1/19/5+P1+F1/19+G1/19/5+V1/19.1'p-5--42c-5p-5--4I1+L1+E1/16/19/5+H1/19/5'c-4D1/19/5+P1+F1/19+G1/19/5+V1/19.1'p-5--4c-5p-5--44I1+L1+E1/16/19/5+H1/19/5'c-5I1+L1+E1/16/19/5+H1/19/5'p-5--4I1+L1+E1/16/19/5+H1/19/5'c-5p-5--4c-5p-5--44I1+L1+E1/16/19/5+H1/19/5'2p-5--4I1+L1+E1/16/19/5+H1/19/5'c-5p-5--4c-5p-5--42c-5p-5--42c-5p-5--43I1+L1+E1/16/19/5+H1/19/5'2p-5--4I1+L1+E1/16/19/5+H1/19/5'c-5p-5--44I1+L1+E1/16/19/5+H1/19/5'c-5p-5--44I1+L1+E1/16/19/5+H1/19/5'c-5p-5--44I1+L1+E1/16/19/5+H1/19/5'p-5--42I1+L1+E1/16/19/5+H1/19/5'c-5p-5--4I1+L1+E1/16/19/5+H1/19/5'p-5--4I1+L1+E1/16/19/5+H1/19/5'c-5p-5--4I1+L1+E1/16/19/5+H1/19/5'2p-5--4I1+L1+E1/16/19/5+H1/19/5'2D1/19/5+P1+F1/19+G1/19/5+V1/19.1'p-5--42I1+L1+E1/16/19/5+H1/19/5'c-5p-5--43I1+L1+E1/16/19/5+H1/19/5'p-5--42I1+L1+E1/16/19/5+H1/19/5'2c-5p-5--42I1+L1+E1/16/19/5+H1/19/5'c-5p-5--4I1+L1+E1/16/19/5+H1/19/5'p-5--4I1+L1+E1/16/19/5+H1/19/5'p-5--44I1+L1+E1/16/19/5+H1/19/5'c-5p-5--4I1+L1+E1/16/19/5+H1/19/5'p-5--4I1+L1+E1/16/19/5+H1/19/5'3c-5p-5--4I1+L1+E1/16/19/5+H1/19/5'p-5--42I1+L1+E1/16/19/5+H1/19/5'c-5p-5--4I1+L1+E1/16/19/5+H1/19/5'p-5--4I1+L1+E1/16/19/5+H1/19/5'2c-5p-5--4I1+L1+E1/16/19/5+H1/19/5'p-5--42I1+L1+E1/16/19/5+H1/19/5'c-5p-5--4I1+L1+E1/16/19/5+H1/19/5'p-5--4c-5p-5--4I1+L1+E1/16/19/5+H1/19/5'c-5p-5--42c-5p-5--44I1+L1+E1/16/19/5+H1/19/5'c-5p-5--42c-5p-5--44I1+L1+E1/16/19/5+H1/19/5'c-5D1/19/5+P1+F1/19+G1/19/5+V1/19.1'p-5--42I1+L1+E1/16/19/5+H1/19/5'c-5p-5--42I1+L1+E1/16/19/5+H1/19/5'p-5--44I1+L1+E1/16/19/5+H1/19/5'c-5D1/19/5+P1+F1/19+G1/19/5+V1/19.1'p-5--42I1+L1+E1/16/19/5+H1/19/5'c-5p-5--42I1+L1+E1/16/19/5+H1/19/5'p-5--44I1+L1+E1/16/19/5+H1/19/5'c-5D1/19/5+P1+F1/19+G1/19/5+V1/19.1'p-5--42I1+L1+E1/16/19/5+H1/19/5'c-5p-5--42I1+L1+E1/16/19/5+H1/19/5'c-5p-5--4c-5p-5--42c-5p-5--44I1+L1+E1/16/19/5+H1/19/5'c-5p-5--46I1+L1+E1/16/19/5+H1/19/5'c-5I1+L1+E1/16/19/5+H1/19/5'p-5--4I1+L1+E1/16/19/5+H1/19/5'c-5p-5--42c-5p-5--42c-5p-5--4c-5p-5--4I1+L1+E1/16/19/5+H1/19/5'2c-5p-5--42I1+L1+E1/16/19/5+H1/19/5'c-5p-5--42D1/19/5+P1+F1/19+G1/19/5+V1/19.1'p-5--4I1+L1+E1/16/19/5+H1/19/5'c-5p-5--44I1+L1+E1/16/19/5+H1/19/5'c-5p-5--44I1+L1+E1/16/19/5+H1/19/5'c-5p-5--44I1+L1+E1/16/19/5+H1/19/5'c-5p-5--43I1+L1+E1/16/19/5+H1/19/5'c-5p-5--42I1+L1+E1/16/19/5+H1/19/5'c-5p-5--4I1+L1+E1/16/19/5+H1/19/5'4p-5--43I1+L1+E1/16/19/5+H1/19/5'c-5p-5--43I1+L1+E1/16/19/5+H1/19/5'p-5--42I1+L1+E1/16/19/5+H1/19/5'c-5p-5--43I1+L1+E1/16/19/5+H1/19/5'c-5p-5--43I1+L1+E1/16/19/5+H1/19/5'c-5p-5--42I1+L1+E1/16/19/5+H1/19/5'c-5p-5--4I1+L1+E1/16/19/5+H1/19/5'p-5--42I1+L1+E1/16/19/5+H1/19/5'c-5p-5--4I1+L1+E1/16/19/5+H1/19/5'p-5--42I1+L1+E1/16/19/5+H1/19/5'c-5p-5--4I1+L1+E1/16/19/5+H1/19/5'p-5--42I1+L1+E1/16/19/5+H1/19/5'c-5p-5--44I1+L1+E1/16/19/5+H1/19/5'c-5p-5--42I1+L1+E1/16/19/5+H1/19/5'c-5p-5--4I1+L1+E1/16/19/5+H1/19/5'c-5p-5--44I1+L1+E1/16/19/5+H1/19/5'c-5p-5--42I1+L1+E1/16/19/5+H1/19/5'c-5p-5--4I1+L1+E1/16/19/5+H1/19/5'c-5p-5--4I1+L1+E1/16/19/5+H1/19/5'p-5--42I1+L1+E1/16/19/5+H1/19/5'c-5p-5--42I1+L1+E1/16/19/5+H1/19/5'c-5p-5--43I1+L1+E1/16/19/5+H1/19/5'2c-5p-5--4I1+L1+E1/16/19/5+H1/19/5'p-5--4I1+L1+E1/16/19/5+H1/19/5'3c-5p-5--4c-5p-5--4I1+L1+E1/16/19/5+H1/19/5'p-5--4I1+L1+E1/16/19/5+H1/19/5'3c-5p-5--43I1+L1+E1/16/19/5+H1/19/5'c-5p-5--4I1+L1+E1/16/19/5+H1/19/5'c-5p-5--42I1+L1+E1/16/19/5+H1/19/5'c-5p-5--4I1+L1+E1/16/19/5+H1/19/5'p-5--4c-5p-5--4I1+L1+E1/16/19/5+H1/19/5'p-5--4c-5p-5--4I1+L1+E1/16/19/5+H1/19/5'c-5p-5--42c-5p-5--43I1+L1+E1/16/19/5+H1/19/5'c-5p-5--4c-5p-5--42c-5p-5--43c-5I1+L1+E1/16/19/5+H1/19/5'p-5--43c-5p-5--42I1+L1+E1/16/19/5+H1/19/5'c-5I1+L1+E1/16/19/5+H1/19/5'p-5--42I1+L1+E1/16/19/5+H1/19/5'c-5p-5--42I1+L1+E1/16/19/5+H1/19/5'c-5p-5--4I1+L1+E1/16/19/5+H1/19/5'2c-5p-5--4I1+L1+E1/16/19/5+H1/19/5'2c-5p-5--4I1+L1+E1/16/19/5+H1/19/5'2c-5p-5--4I1+L1+E1/16/19/5+H1/19/5'2c-5p-5--4I1+L1+E1/16/19/5+H1/19/5'2c-5p-5--4I1+L1+E1/16/19/5+H1/19/5'2c-5p-5--4I1+L1+E1/16/19/5+H1/19/5'2c-5p-5--4I1+L1+E1/16/19/5+H1/19/5'2c-5p-5--4I1+L1+E1/16/19/5+H1/19/5'2c-5p-5--4I1+L1+E1/16/19/5+H1/19/5'2c-5p-5--4I1+L1+E1/16/19/5+H1/19/5'2c-5p-5--4I1+L1+E1/16/19/5+H1/19/5'2c-5p-5--4I1+L1+E1/16/19/5+H1/19/5'2c-5p-5--4I1+L1+E1/16/19/5+H1/19/5'2c-5p-5--4I1+L1+E1/16/19/5+H1/19/5'2c-5p-5--4I1+L1+E1/16/19/5+H1/19/5'2c-5p-5--4I1+L1+E1/16/19/5+H1/19/5'2c-5p-5--4I1+L1+E1/16/19/5+H1/19/5'2c-5p-5--4I1+L1+E1/16/19/5+H1/19/5'2c-5p-5--4I1+L1+E1/16/19/5+H1/19/5'2c-5p-5--4I1+L1+E1/16/19/5+H1/19/5'2c-5p-5--4I1+L1+E1/16/19/5+H1/19/5'2c-5p-5--4I1+L1+E1/16/19/5+H1/19/5'2c-5p-5--4I1+L1+E1/16/19/5+H1/19/5'2c-5p-5--4I1+L1+E1/16/19/5+H1/19/5'2c-5p-5--4I1+L1+E1/16/19/5+H1/19/5'2c-5p-5--4I1+L1+E1/16/19/5+H1/19/5'2c-5p-5--4I1+L1+E1/16/19/5+H1/19/5'2c-5p-5--44I1+L1+E1/16/19/5+H1/19/5'c-5p-5--44I1+L1+E1/16/19/5+H1/19/5'c-5p-5--4I1+L1+E1/16/19/5+H1/19/5'c-5I1+L1+E1/16/19/5+H1/19/5'p-5--43I1+L1+E1/16/19/5+H1/19/5'c-5p-5--44I1+L1+E1/16/19/5+H1/19/5'c-52p-5--42c-5p-5--44I1+L1+E1/16/19/5+H1/19/5'c-5p-5--42I1+L1+E1/16/19/5+H1/19/5'2c-5p-5--44I1+L1+E1/16/19/5+H1/19/5'c-5p-5--4I1+L1+E1/16/19/5+H1/19/5'c-5I1+L1+E1/16/19/5+H1/19/5'p-5--43I1+L1+E1/16/19/5+H1/19/5'c-5p-5--43I1+L1+E1/16/19/5+H1/19/5'2c-5p-5--42I1+L1+E1/16/19/5+H1/19/5'c-5p-5--42I1+L1+E1/16/19/5+H1/19/5'c-5p-5--4I1+L1+E1/16/19/5+H1/19/5'p-5--4c-5p-5--42c-4D1/19/5+P1+F1/19+G1/19/5+V1/19.1'p-5--4I1+L1+E1/16/19/5+H1/19/5'c-3p-5--4c-52p-5--4I1+L1+E1/16/19/5+H1/19/5'p-5--43I1+L1+E1/16/19/5+H1/19/5'p-5--4I1+L1+E1/16/19/5+H1/19/5'2c-5p-5--42I1+L1+E1/16/19/5+H1/19/5'c-5p-5--4I1+L1+E1/16/19/5+H1/19/5'p-5--4c-5p-5--42c-4D1/19/5+P1+F1/19+G1/19/5+V1/19.1'p-5--4c-5p-5--42c-52p-5--4I1+L1+E1/16/19/5+H1/19/5'p-5--43I1+L1+E1/16/19/5+H1/19/5'p-5--4I1+L1+E1/16/19/5+H1/19/5'2c-5p-5--43I1+L1+E1/16/19/5+H1/19/5'p-5--4I1+L1+E1/16/19/5+H1/19/5'c-5p-5--4I1+L1+E1/16/19/5+H1/19/5'p-5--4I1+L1+E1/16/19/5+H1/19/5'c-5p-5--44c-5p-5--4c-5p-5--42c-5p-5--42c-5p-5--44c-5p-5--44c-5p-5--44c-5I1+L1+E1/16/19/5+H1/19/5'3c-5p-5--4I1+L1+E1/16/19/5+H1/19/5'2p-5--44c-4D1/19/5+P1+F1/19+G1/19/5+V1/19.1'p-5--43I1+L1+E1/16/19/5+H1/19/5'c-5p-5--43I1+L1+E1/16/19/5+H1/19/5'2c-5p-5--4I1+L1+E1/16/19/5+H1/19/5'p-5--42c-5p-5--42c-5p-5--4D1/19/5+P1+F1/19+G1/19/5+V1/19.1'p-5--4I1+L1+E1/16/19/5+H1/19/5'2c-5p-5--4D1/19/5+P1+F1/19+G1/19/5+V1/19.1'p-5--4I1+L1+E1/16/19/5+H1/19/5'2p-5--42I1+L1+E1/16/19/5+H1/19/5'c-5p-5--4I1+L1+E1/16/19/5+H1/19/5'c-5p-5--44c-5p-5--4I1+L1+E1/16/19/5+H1/19/5'p-5--4I1+L1+E1/16/19/5+H1/19/5'p-5--4I1+L1+E1/16/19/5+H1/19/5'p-5--4I1+L1+E1/16/19/5+H1/19/5'2c-5p-5--4I1+L1+E1/16/19/5+H1/19/5'p-5--42c-5p-5--4I1+L1+E1/16/19/5+H1/19/5'p-5--4I1+L1+E1/16/19/5+H1/19/5'p-5--4I1+L1+E1/16/19/5+H1/19/5'p-5--4I1+L1+E1/16/19/5+H1/19/5'c-5p-5--4D1/19/5+P1+F1/19+G1/19/5+V1/19.1'p-5--4I1+L1+E1/16/19/5+H1/19/5'2c-5p-5--42c-5p-5--4I1+L1+E1/16/19/5+H1/19/5'p-5--4I1+L1+E1/16/19/5+H1/19/5'p-5--4I1+L1+E1/16/19/5+H1/19/5'p-5--42I1+L1+E1/16/19/5+H1/19/5'c-5p-5--44I1+L1+E1/16/19/5+H1/19/5'c-5p-5--44I1+L1+E1/16/19/5+H1/19/5'p-5--4I1+L1+E1/16/19/5+H1/19/5'c-5p-5--4I1+L1+E1/16/19/5+H1/19/5'c-5p-5--43I1+L1+E1/16/19/5+H1/19/5'c-5D1/19/5+P1+F1/19+G1/19/5+V1/19.1'p-5--42c-5p-5--4I1+L1+E1/16/19/5+H1/19/5'c-5p-5--4I1+L1+E1/16/19/5+H1/19/5'2p-5--4I1+L1+E1/16/19/5+H1/19/5'c-5p-5--4I1+L1+E1/16/19/5+H1/19/5'c-5p-5--42c-5p-5--43I1+L1+E1/16/19/5+H1/19/5'c-5p-5--42I1+L1+E1/16/19/5+H1/19/5'c-3I1+L1+E1/16/19/5+H1/19/5'D1/19/5+P1+F1/19+G1/19/5+V1/19.1'p-5--4I1+L1+E1/16/19/5+H1/19/5'c-5p-5--42I1+L1+E1/16/19/5+H1/19/5'c-5p-5--4I1+L1+E1/16/19/5+H1/19/5'p-5--42I1+L1+E1/16/19/5+H1/19/5'p-5--43I1+L1+E1/16/19/5+H1/19/5'c-5p-5--43I1+L1+E1/16/19/5+H1/19/5'c-5D1/19/5+P1+F1/19+G1/19/5+V1/19.1'p-5--4I1+L1+E1/16/19/5+H1/19/5'c-5p-5--42c-5p-5--42D1/19/5+P1+F1/19+G1/19/5+V1/19.1'p-5--4I1+L1+E1/16/19/5+H1/19/5'c-5p-5--43I1+L1+E1/16/19/5+H1/19/5'p-5--43I1+L1+E1/16/19/5+H1/19/5'c-3p-5--4I1+L1+E1/16/19/5+H1/19/5'c-5p-5--43I1+L1+E1/16/19/5+H1/19/5'c-5p-5--4I1+L1+E1/16/19/5+H1/19/5'c-52p-5--42I1+L1+E1/16/19/5+H1/19/5'c-5D1/19/5+P1+F1/19+G1/19/5+V1/19.1'p-5--42c-5p-5--44c-5p-5--44I1+L1+E1/16/19/5+H1/19/5'c-5p-5--44c-4D1/19/5+P1+F1/19+G1/19/5+V1/19.1'I1+L1+E1/16/19/5+H1/19/5'p-5--42I1+L1+E1/16/19/5+H1/19/5'c-5p-5--42I1+L1+E1/16/19/5+H1/19/5'c-5p-5--44I1+L1+E1/16/19/5+H1/19/5'c-5p-5--42I1+L1+E1/16/19/5+H1/19/5'c-5p-5--42c-5p-5--42D1/19/5+P1+F1/19+G1/19/5+V1/19.1'p-5--4I1+L1+E1/16/19/5+H1/19/5'c-5p-5--43I1+L1+E1/16/19/5+H1/19/5'p-5--43I1+L1+E1/16/19/5+H1/19/5'c-5p-5--43I1+L1+E1/16/19/5+H1/19/5'c-5p-5--4I1+L1+E1/16/19/5+H1/19/5'c-5p-5--43I1+L1+E1/16/19/5+H1/19/5'c-5p-5--42c-5p-5--44I1+L1+E1/16/19/5+H1/19/5'c-5p-5--4I1+L1+E1/16/19/5+H1/19/5'c-5I1+L1+E1/16/19/5+H1/19/5'c-5p-5--42I1+L1+E1/16/19/5+H1/19/5'c-5p-5--42I1+L1+E1/16/19/5+H1/19/5'c-5p-5--42I1+L1+E1/16/19/5+H1/19/5'c-5p-5--42c-5D1/19/5+P1+F1/19+G1/19/5+V1/19.1'p-5--42I1+L1+E1/16/19/5+H1/19/5'p-5--4c-5p-5--4I1+L1+E1/16/19/5+H1/19/5'p-5--4I1+L1+E1/16/19/5+H1/19/5'p-3--2p-5--42I1+L1+E1/16/19/5+H1/19/5'p-5--42I1+L1+E1/16/19/5+H1/19/5'p-3--2p-5--42I1+L1+E1/16/19/5+H1/19/5'p-5--42I1+L1+E1/16/19/5+H1/19/5'p-5--43c-5I1+L1+E1/16/19/5+H1/19/5'c-5I1+L1+E1/16/19/5+H1/19/5'p-5--42c-5p-5--4c-5p-5--45I1+L1+E1/16/19/5+H1/19/5'c-5p-5--42I1+L1+E1/16/19/5+H1/19/5'c-5p-5--42I1+L1+E1/16/19/5+H1/19/5'p-5--3D1/19/5+P1+F1/19+G1/19/5+V1/19.1'c-5p-5--42I1+L1+E1/16/19/5+H1/19/5'c-5p-5--4I1+L1+E1/16/19/5+H1/19/5'p-5--43c-5p-5--4I1+L1+E1/16/19/5+H1/19/5'p-5--4I1+L1+E1/16/19/5+H1/19/5'p-4--2D1/19/5+P1+F1/19+G1/19/5+V1/19.1'c-5p-5--4c-5I1+L1+E1/16/19/5+H1/19/5'2p-5--4I1+L1+E1/16/19/5+H1/19/5'c-5p-5--42I1+L1+E1/16/19/5+H1/19/5'p-5--4I1+L1+E1/16/19/5+H1/19/5'2p-3--5p-5--4I1+L1+E1/16/19/5+H1/19/5'p-5--44p-5--2D1/19/5+P1+F1/19+G1/19/5+V1/19.1'p-5--42c-5p-5--4c-5I1+L1+E1/16/19/5+H1/19/5'2p-5--4I1+L1+E1/16/19/5+H1/19/5'c-5p-5--4c-5I1+L1+E1/16/19/5+H1/19/5'2p-5--4I1+L1+E1/16/19/5+H1/19/5'c-5p-5--44c-5p-5--42c-5p-5--4c-5p-5--42c-5p-5--42c-5p-5--4c-5p-5--42c-5p-5--4c-5p-5--4I1+L1+E1/16/19/5+H1/19/5'p-5--4c-5p-5--44c-5p-5--4c-5p-5--43c-5p-5--4c-5p-5--4I1+L1+E1/16/19/5+H1/19/5'p-5--4c-5p-5--44c-5p-5--4c-5p-5--44c-5p-5--43c-52p-5--4I1+L1+E1/16/19/5+H1/19/5'2c-5p-5--44c-5p-5--4I1+L1+E1/16/19/5+H1/19/5'2c-5p-5--44c-5p-5--43I1+L1+E1/16/19/5+H1/19/5'c-2p-2--4p-5--42I1+L1+E1/16/19/5+H1/19/5'p-5--4c-5p-5--45c-5p-5--43I1+L1+E1/16/19/5+H1/19/5'c-5p-5--43I1+L1+E1/16/19/5+H1/19/5'c-5p-5--44I1+L1+E1/16/19/5+H1/19/5'c-1p-1--4c-5p-5--4I1+L1+E1/16/19/5+H1/19/5'p-5--4I1+L1+E1/16/19/5+H1/19/5'p-5--4c-5p-5--42I1+L1+E1/16/19/5+H1/19/5'c-5p-5--42I1+L1+E1/16/19/5+H1/19/5'p-5--42I1+L1+E1/16/19/5+H1/19/5'c-5p-5--4I1+L1+E1/16/19/5+H1/19/5'p-5--43I1+L1+E1/16/19/5+H1/19/5'c-4D1/19/5+P1+F1/19+G1/19/5+V1/19.1'p-5--43I1+L1+E1/16/19/5+H1/19/5'c-5p-5--4c-5p-5--42I1+L1+E1/16/19/5+H1/19/5'2c-5p-5--4I1+L1+E1/16/19/5+H1/19/5'c-5p-5--44I1+L1+E1/16/19/5+H1/19/5'c-5p-5--43I1+L1+E1/16/19/5+H1/19/5'c-5p-5--42c-5p-5--43I1+L1+E1/16/19/5+H1/19/5'c-5p-5--42I1+L1+E1/16/19/5+H1/19/5'c-5p-5--43I1+L1+E1/16/19/5+H1/19/5'p-5--42c-5p-5--42I1+L1+E1/16/19/5+H1/19/5'c-5p-5--42I1+L1+E1/16/19/5+H1/19/5'c-5p-5--45I1+L1+E1/16/19/5+H1/19/5'2c-5p-5--45I1+L1+E1/16/19/5+H1/19/5'2c-5p-5--42I1+L1+E1/16/19/5+H1/19/5'2c-5p-5--44I1+L1+E1/16/19/5+H1/19/5'c-5p-5--42I1+L1+E1/16/19/5+H1/19/5'2c-5p-5--4I1+L1+E1/16/19/5+H1/19/5'p-5--4I1+L1+E1/16/19/5+H1/19/5'c-5p-5--42I1+L1+E1/16/19/5+H1/19/5'c-5p-5--43I1+L1+E1/16/19/5+H1/19/5'c-5p-5--42I1+L1+E1/16/19/5+H1/19/5'c-5p-5--44c-5p-5--42I1+L1+E1/16/19/5+H1/19/5'c-5p-5--42I1+L1+E1/16/19/5+H1/19/5'c-5p-5--44c-5p-5--43c-5p-5--43c-52p-5--4I1+L1+E1/16/19/5+H1/19/5'c-5p-5--4I1+L1+E1/16/19/5+H1/19/5'p-5--43I1+L1+E1/16/19/5+H1/19/5'c-5p-5--4I1+L1+E1/16/19/5+H1/19/5'p-5--4c-5p-5--4I1+L1+E1/16/19/5+H1/19/5'p-5--43I1+L1+E1/16/19/5+H1/19/5'c-5p-5--4I1+L1+E1/16/19/5+H1/19/5'p-5--4c-5I1+L1+E1/16/19/5+H1/19/5'p-5--42I1+L1+E1/16/19/5+H1/19/5'c-5p-5--46I1+L1+E1/16/19/5+H1/19/5'c-5p-5--43c-5p-5--44I1+L1+E1/16/19/5+H1/19/5'c-5p-5--42I1+L1+E1/16/19/5+H1/19/5'c-5p-5--42c-5p-5--42I1+L1+E1/16/19/5+H1/19/5'2c-5p-5--4I1+L1+E1/16/19/5+H1/19/5'c-5p-5--44I1+L1+E1/16/19/5+H1/19/5'p-5--2p-5--4I1+L1+E1/16/19/5+H1/19/5'c-5p-5--43I1+L1+E1/16/19/5+H1/19/5'c-5p-5--44I1+L1+E1/16/19/5+H1/19/5'p-5--2p-5--4I1+L1+E1/16/19/5+H1/19/5'c-5p-5--43I1+L1+E1/16/19/5+H1/19/5'c-5p-5--4I1+L1+E1/16/19/5+H1/19/5'c-5p-5--43I1+L1+E1/16/19/5+H1/19/5'c-5p-5--43I1+L1+E1/16/19/5+H1/19/5'c-5p-5--42I1+L1+E1/16/19/5+H1/19/5'2c-5p-5--42I1+L1+E1/16/19/5+H1/19/5'2c-5p-5--44I1+L1+E1/16/19/5+H1/19/5'c-5p-5--42I1+L1+E1/16/19/5+H1/19/5'c-5p-5--43I1+L1+E1/16/19/5+H1/19/5'c-5p-5--42I1+L1+E1/16/19/5+H1/19/5'2c-5p-5--43I1+L1+E1/16/19/5+H1/19/5'c-5p-5--42I1+L1+E1/16/19/5+H1/19/5'c-5p-5--43c-5p-5--43I1+L1+E1/16/19/5+H1/19/5'c-5p-5--4I1+L1+E1/16/19/5+H1/19/5'c-5p-5--4I1+L1+E1/16/19/5+H1/19/5'p-5--43I1+L1+E1/16/19/5+H1/19/5'c-5p-5--4I1+L1+E1/16/19/5+H1/19/5'p-5--43I1+L1+E1/16/19/5+H1/19/5'c-5p-5--43I1+L1+E1/16/19/5+H1/19/5'c-5p-5--42I1+L1+E1/16/19/5+H1/19/5'c-5p-5--43I1+L1+E1/16/19/5+H1/19/5'c-5p-5--42I1+L1+E1/16/19/5+H1/19/5'2c-5p-5--42I1+L1+E1/16/19/5+H1/19/5'2c-5p-5--42I1+L1+E1/16/19/5+H1/19/5'2c-5p-5--42I1+L1+E1/16/19/5+H1/19/5'2c-5p-5--43c-5p-5--43I1+L1+E1/16/19/5+H1/19/5'c-5p-5--4I1+L1+E1/16/19/5+H1/19/5'c-5p-5--4I1+L1+E1/16/19/5+H1/19/5'c-5p-5--4I1+L1+E1/16/19/5+H1/19/5'c-5p-5--4I1+L1+E1/16/19/5+H1/19/5'p-5--43I1+L1+E1/16/19/5+H1/19/5'c-5p-5--42I1+L1+E1/16/19/5+H1/19/5'c-5p-5--4I1+L1+E1/16/19/5+H1/19/5'c-5D1/19/5+P1+F1/19+G1/19/5+V1/19.1'p-5--4I1+L1+E1/16/19/5+H1/19/5'c-5p-5--42I1+L1+E1/16/19/5+H1/19/5'p-5--4c-5p-5--42I1+L1+E1/16/19/5+H1/19/5'c-5p-5--42I1+L1+E1/16/19/5+H1/19/5'c-5p-5--42I1+L1+E1/16/19/5+H1/19/5'c-5p-5--42I1+L1+E1/16/19/5+H1/19/5'c-5p-5--4c-5p-5--42I1+L1+E1/16/19/5+H1/19/5'c-5p-5--42I1+L1+E1/16/19/5+H1/19/5'c-5p-5--4p-5--2c-5p-5--43p-5--2p-5--4c-5p-5--4c-5I1+L1+E1/16/19/5+H1/19/5'c-3p-5--43I1+L1+E1/16/19/5+H1/19/5'p-5--4I1+L1+E1/16/19/5+H1/19/5'p-5--4c-5I1+L1+E1/16/19/5+H1/19/5'p-5--45c-5I1+L1+E1/16/19/5+H1/19/5'2p-5--4c-5p-5--4I1+L1+E1/16/19/5+H1/19/5'p-5--4c-5p-5--44I1+L1+E1/16/19/5+H1/19/5'c-5p-5--4I1+L1+E1/16/19/5+H1/19/5'c-5p-5--4I1+L1+E1/16/19/5+H1/19/5'c-5p-5--4I1+L1+E1/16/19/5+H1/19/5'p-5--4c-5p-5--42c-5p-5--4c-5p-5--4c-5p-5--4I1+L1+E1/16/19/5+H1/19/5'p-5--42I1+L1+E1/16/19/5+H1/19/5'c-5I1+L1+E1/16/19/5+H1/19/5'p-5--42I1+L1+E1/16/19/5+H1/19/5'D1/19/5+P1+F1/19+G1/19/5+V1/19.1'p-5--42I1+L1+E1/16/19/5+H1/19/5'c-5I1+L1+E1/16/19/5+H1/19/5'c-5p-5--4I1+L1+E1/16/19/5+H1/19/5'p-5--42I1+L1+E1/16/19/5+H1/19/5'c-5I1+L1+E1/16/19/5+H1/19/5'p-5--42I1+L1+E1/16/19/5+H1/19/5'D1/19/5+P1+F1/19+G1/19/5+V1/19.1'I1+L1+E1/16/19/5+H1/19/5'c-5I1+L1+E1/16/19/5+H1/19/5'p-5--4c-4D1/19/5+P1+F1/19+G1/19/5+V1/19.1'p-5--42I1+L1+E1/16/19/5+H1/19/5'c-4D1/19/5+P1+F1/19+G1/19/5+V1/19.1'I1+L1+E1/16/19/5+H1/19/5'c-5p-5--4I1+L1+E1/16/19/5+H1/19/5'c-5p-5--4c-5p-5--4c-5p-5--4c-5p-5--4c-5p-5--4I1+L1+E1/16/19/5+H1/19/5'c-5p-5--4c-5p-5--4c-5p-5--43I1+L1+E1/16/19/5+H1/19/5'p-5--4c-5p-5--42I1+L1+E1/16/19/5+H1/19/5'c-5p-5--42I1+L1+E1/16/19/5+H1/19/5'c-5p-5--42I1+L1+E1/16/19/5+H1/19/5'c-5p-5--42I1+L1+E1/16/19/5+H1/19/5'c-5p-5--42I1+L1+E1/16/19/5+H1/19/5'c-5p-5--42I1+L1+E1/16/19/5+H1/19/5'c-5p-5--44I1+L1+E1/16/19/5+H1/19/5'c-4D1/19/5+P1+F1/19+G1/19/5+V1/19.1'p-5--4I1+L1+E1/16/19/5+H1/19/5'c-52p-5--42I1+L1+E1/16/19/5+H1/19/5'c-52p-5--42I1+L1+E1/16/19/5+H1/19/5'c-5p-5--4c-4D1/19/5+P1+F1/19+G1/19/5+V1/19.1'p-5--4I1+L1+E1/16/19/5+H1/19/5'c-52p-5--42I1+L1+E1/16/19/5+H1/19/5'c-5p-5--42I1+L1+E1/16/19/5+H1/19/5'c-52p-5--42I1+L1+E1/16/19/5+H1/19/5'c-5p-5--43I1+L1+E1/16/19/5+H1/19/5'p-4--1D1/19/5+P1+F1/19+G1/19/5+V1/19.1'p-5--4I1+L1+E1/16/19/5+H1/19/5'c-5p-5--43I1+L1+E1/16/19/5+H1/19/5'c-5p-5--43I1+L1+E1/16/19/5+H1/19/5'c-5p-5--42I1+L1+E1/16/19/5+H1/19/5'c-5p-5--42I1+L1+E1/16/19/5+H1/19/5'c-5p-5--43I1+L1+E1/16/19/5+H1/19/5'c-5p-5--42I1+L1+E1/16/19/5+H1/19/5'c-5p-5--42I1+L1+E1/16/19/5+H1/19/5'c-5p-5--42I1+L1+E1/16/19/5+H1/19/5'c-5p-5--4I1+L1+E1/16/19/5+H1/19/5'p-5--42c-5p-5--4p-5--2p-5--43c-5p-5--4p-5--2I1+L1+E1/16/19/5+H1/19/5'c-5p-5--43I1+L1+E1/16/19/5+H1/19/5'c-5p-5--44I1+L1+E1/16/19/5+H1/19/5'c-5p-5--43I1+L1+E1/16/19/5+H1/19/5'c-5p-5--43I1+L1+E1/16/19/5+H1/19/5'2p-5--43c-4D1/19/5+P1+F1/19+G1/19/5+V1/19.1'p-5--4I1+L1+E1/16/19/5+H1/19/5'c-5p-5--43c-5I1+L1+E1/16/19/5+H1/19/5'p-5--44I1+L1+E1/16/19/5+H1/19/5'c-5I1+L1+E1/16/19/5+H1/19/5'p-5--4I1+L1+E1/16/19/5+H1/19/5'p-3--5c-5p-5--45I1+L1+E1/16/19/5+H1/19/5'c-5p-5--4I1+L1+E1/16/19/5+H1/19/5'p-5--44c-5p-5--42c-5I1+L1+E1/16/19/5+H1/19/5'p-5--43c-5p-5--4c-5I1+L1+E1/16/19/5+H1/19/5'p-5--43c-5p-5--4c-52p-5--42p-5--2p-5--4p-5--3D1/19/5+P1+F1/19+G1/19/5+V1/19.1'c-5p-5--42p-5--3D1/19/5+P1+F1/19+G1/19/5+V1/19.1'c-5p-5--4D1/19/5+P1+F1/19+G1/19/5+V1/19.1'p-5--3D1/19/5+P1+F1/19+G1/19/5+V1/19.1'c-5I1+L1+E1/16/19/5+H1/19/5'p-5--4D1/19/5+P1+F1/19+G1/19/5+V1/19.1'c-5p-5--4c-5p-5--4I1+L1+E1/16/19/5+H1/19/5'c-5p-5--42p-5--2D1/19/5+P1+F1/19+G1/19/5+V1/19.1'c-5p-5--44c-5p-5--4c-5p-5--4I1+L1+E1/16/19/5+H1/19/5'c-3c-5p-5--43I1+L1+E1/16/19/5+H1/19/5'2c-5p-5--44c-5p-5--44c-5p-5--4I1+L1+E1/16/19/5+H1/19/5'p-5--42c-5p-5--4I1+L1+E1/16/19/5+H1/19/5'p-5--4I1+L1+E1/16/19/5+H1/19/5'p-5--44I1+L1+E1/16/19/5+H1/19/5'c-5p-5--4D1/19/5+P1+F1/19+G1/19/5+V1/19.1'p-5--4I1+L1+E1/16/19/5+H1/19/5'2c-5p-5--4I1+L1+E1/16/19/5+H1/19/5'p-5--4I1+L1+E1/16/19/5+H1/19/5'2c-5p-5--44I1+L1+E1/16/19/5+H1/19/5'c-5p-5--44I1+L1+E1/16/19/5+H1/19/5'c-5p-5--43I1+L1+E1/16/19/5+H1/19/5'c-5p-5--4I1+L1+E1/16/19/5+H1/19/5'p-5--4I1+L1+E1/16/19/5+H1/19/5'p-5--4I1+L1+E1/16/19/5+H1/19/5'p-5--42I1+L1+E1/16/19/5+H1/19/5'c-5p-5--4I1+L1+E1/16/19/5+H1/19/5'p-5--42I1+L1+E1/16/19/5+H1/19/5'c-5p-5--4I1+L1+E1/16/19/5+H1/19/5'p-5--42I1+L1+E1/16/19/5+H1/19/5'c-5p-5--43I1+L1+E1/16/19/5+H1/19/5'c-5p-5--4I1+L1+E1/16/19/5+H1/19/5'p-5--4I1+L1+E1/16/19/5+H1/19/5'c-5p-5--4I1+L1+E1/16/19/5+H1/19/5'p-5--42I1+L1+E1/16/19/5+H1/19/5'c-5p-5--4I1+L1+E1/16/19/5+H1/19/5'p-5--4I1+L1+E1/16/19/5+H1/19/5'c-5p-5--4I1+L1+E1/16/19/5+H1/19/5'c-52p-5--4I1+L1+E1/16/19/5+H1/19/5'c-5p-5--42c-5p-5--42c-5p-5--42c-5p-5--42c-5p-5--4I1+L1+E1/16/19/5+H1/19/5'c-5p-5--42I1+L1+E1/16/19/5+H1/19/5'c-5p-5--42c-5p-5--42I1+L1+E1/16/19/5+H1/19/5'c-4D1/19/5+P1+F1/19+G1/19/5+V1/19.1'p-5--42c-5p-5--42I1+L1+E1/16/19/5+H1/19/5'c-4D1/19/5+P1+F1/19+G1/19/5+V1/19.1'p-5--4I1+L1+E1/16/19/5+H1/19/5'c-5p-5--48c-5p-5--42c-5p-5--44I1+L1+E1/16/19/5+H1/19/5'c-5p-5--46I1+L1+E1/16/19/5+H1/19/5'c-5p-5--4I1+L1+E1/16/19/5+H1/19/5'c-5p-5--42c-5p-5--43c-5p-5--4I1+L1+E1/16/19/5+H1/19/5'2c-5p-5--44I1+L1+E1/16/19/5+H1/19/5'c-5p-5--43I1+L1+E1/16/19/5+H1/19/5'c-5p-5--42D1/19/5+P1+F1/19+G1/19/5+V1/19.1'p-5--4I1+L1+E1/16/19/5+H1/19/5'c-5p-5--44I1+L1+E1/16/19/5+H1/19/5'c-5p-5--44I1+L1+E1/16/19/5+H1/19/5'c-5p-5--44I1+L1+E1/16/19/5+H1/19/5'c-5p-5--42I1+L1+E1/16/19/5+H1/19/5'c-5p-5--43I1+L1+E1/16/19/5+H1/19/5'c-5p-5--43I1+L1+E1/16/19/5+H1/19/5'2p-5--4I1+L1+E1/16/19/5+H1/19/5'c-5p-5--42I1+L1+E1/16/19/5+H1/19/5'p-5--4I1+L1+E1/16/19/5+H1/19/5'2p-5--43I1+L1+E1/16/19/5+H1/19/5'c-5p-5--43I1+L1+E1/16/19/5+H1/19/5'p-5--4I1+L1+E1/16/19/5+H1/19/5'2c-5p-5--42I1+L1+E1/16/19/5+H1/19/5'c-5p-5--4I1+L1+E1/16/19/5+H1/19/5'p-5--42I1+L1+E1/16/19/5+H1/19/5'c-5p-5--42I1+L1+E1/16/19/5+H1/19/5'c-5p-5--44I1+L1+E1/16/19/5+H1/19/5'c-4D1/19/5+P1+F1/19+G1/19/5+V1/19.1'p-5--4I1+L1+E1/16/19/5+H1/19/5'c-5p-5--4I1+L1+E1/16/19/5+H1/19/5'p-5--42I1+L1+E1/16/19/5+H1/19/5'c-5p-5--42I1+L1+E1/16/19/5+H1/19/5'c-5p-5--44I1+L1+E1/16/19/5+H1/19/5'c-5p-5--4I1+L1+E1/16/19/5+H1/19/5'p-5--4I1+L1+E1/16/19/5+H1/19/5'3c-5p-5--4c-5p-5--43I1+L1+E1/16/19/5+H1/19/5'c-5p-5--4I1+L1+E1/16/19/5+H1/19/5'p-5--4I1+L1+E1/16/19/5+H1/19/5'3c-5p-5--4c-5p-5--4I1+L1+E1/16/19/5+H1/19/5'3c-5p-5--44I1+L1+E1/16/19/5+H1/19/5'c-5p-5--4I1+L1+E1/16/19/5+H1/19/5'p-5--4I1+L1+E1/16/19/5+H1/19/5'2c-5p-5--42I1+L1+E1/16/19/5+H1/19/5'c-5p-5--4I1+L1+E1/16/19/5+H1/19/5'p-5--4c-5p-5--4I1+L1+E1/16/19/5+H1/19/5'p-5--4c-5p-5--4I1+L1+E1/16/19/5+H1/19/5'c-5p-5--42c-5p-5--42c-5p-5--42c-5p-5--43c-5p-5--42c-5p-5--42c-5p-5--44I1+L1+E1/16/19/5+H1/19/5'c-5D1/19/5+P1+F1/19+G1/19/5+V1/19.1'p-5--4c-5p-5--42c-5p-5--46c-5p-5--42c-5p-5--42I1+L1+E1/16/19/5+H1/19/5'c-5I1+L1+E1/16/19/5+H1/19/5'p-5--42I1+L1+E1/16/19/5+H1/19/5'c-5p-5--4I1+L1+E1/16/19/5+H1/19/5'2c-5p-5--4I1+L1+E1/16/19/5+H1/19/5'2c-5p-5--4I1+L1+E1/16/19/5+H1/19/5'2c-5p-5--4I1+L1+E1/16/19/5+H1/19/5'2c-5p-5--4I1+L1+E1/16/19/5+H1/19/5'2c-5p-5--4I1+L1+E1/16/19/5+H1/19/5'2c-5p-5--4I1+L1+E1/16/19/5+H1/19/5'2c-5p-5--4I1+L1+E1/16/19/5+H1/19/5'2c-5p-5--4I1+L1+E1/16/19/5+H1/19/5'2c-5p-5--4I1+L1+E1/16/19/5+H1/19/5'2c-5p-5--4I1+L1+E1/16/19/5+H1/19/5'2c-5p-5--4I1+L1+E1/16/19/5+H1/19/5'2c-5p-5--4I1+L1+E1/16/19/5+H1/19/5'2c-5p-5--4I1+L1+E1/16/19/5+H1/19/5'2c-5p-5--4I1+L1+E1/16/19/5+H1/19/5'2c-5p-5--4I1+L1+E1/16/19/5+H1/19/5'2c-5p-5--4I1+L1+E1/16/19/5+H1/19/5'2c-5p-5--4I1+L1+E1/16/19/5+H1/19/5'2c-5p-5--4I1+L1+E1/16/19/5+H1/19/5'2c-5p-5--4I1+L1+E1/16/19/5+H1/19/5'2c-5p-5--4I1+L1+E1/16/19/5+H1/19/5'2c-5p-5--43I1+L1+E1/16/19/5+H1/19/5'c-5p-5--44c-5p-5--44I1+L1+E1/16/19/5+H1/19/5'c-5p-5--4I1+L1+E1/16/19/5+H1/19/5'p-5--42I1+L1+E1/16/19/5+H1/19/5'c-52p-5--42I1+L1+E1/16/19/5+H1/19/5'c-5p-5--44I1+L1+E1/16/19/5+H1/19/5'c-5p-5--42I1+L1+E1/16/19/5+H1/19/5'2c-5p-5--44I1+L1+E1/16/19/5+H1/19/5'c-5p-5--4I1+L1+E1/16/19/5+H1/19/5'c-5I1+L1+E1/16/19/5+H1/19/5'p-5--43I1+L1+E1/16/19/5+H1/19/5'c-5p-5--43I1+L1+E1/16/19/5+H1/19/5'2c-5p-5--42I1+L1+E1/16/19/5+H1/19/5'c-5p-5--42I1+L1+E1/16/19/5+H1/19/5'c-5c-3I1+L1+E1/16/19/5+H1/19/5'p-5--4I1+L1+E1/16/19/5+H1/19/5'c-5p-5--44c-5p-5--4c-5p-5--42c-5p-5--42c-5p-5--42c-5p-5--44c-5p-5--44c-5p-5--42c-5p-5--42c-5p-5--42c-5p-5--44c-5p-5--44c-5p-5--44c-5I1+L1+E1/16/19/5+H1/19/5'3p-5--44c-4D1/19/5+P1+F1/19+G1/19/5+V1/19.1'I1+L1+E1/16/19/5+H1/19/5'2p-5--44c-4D1/19/5+P1+F1/19+G1/19/5+V1/19.1'p-5--43c-5p-5--44c-5I1+L1+E1/16/19/5+H1/19/5'3c-5p-5--4I1+L1+E1/16/19/5+H1/19/5'2p-5--44c-4D1/19/5+P1+F1/19+G1/19/5+V1/19.1'p-5--43c-5I1+L1+E1/16/19/5+H1/19/5'3c-5p-5--4c-5p-5--44I1+L1+E1/16/19/5+H1/19/5'c-5p-5--43I1+L1+E1/16/19/5+H1/19/5'2c-5p-5--4I1+L1+E1/16/19/5+H1/19/5'p-5--42I1+L1+E1/16/19/5+H1/19/5'c-5D1/19/5+P1+F1/19+G1/19/5+V1/19.1'I1+L1+E1/16/19/5+H1/19/5'p-5--42I1+L1+E1/16/19/5+H1/19/5'c-5p-5--4I1+L1+E1/16/19/5+H1/19/5'p-5--42c-5p-5--4I1+L1+E1/16/19/5+H1/19/5'p-5--42c-5p-5--42c-5p-5--4I1+L1+E1/16/19/5+H1/19/5'p-5--4I1+L1+E1/16/19/5+H1/19/5'p-5--42I1+L1+E1/16/19/5+H1/19/5'2c-4D1/19/5+P1+F1/19+G1/19/5+V1/19.1'2p-5--4I1+L1+E1/16/19/5+H1/19/5'2p-5--42I1+L1+E1/16/19/5+H1/19/5'c-5p-5--4I1+L1+E1/16/19/5+H1/19/5'c-5p-5--45c-5p-5--42c-5p-5--4I1+L1+E1/16/19/5+H1/19/5'p-5--4I1+L1+E1/16/19/5+H1/19/5'p-5--44I1+L1+E1/16/19/5+H1/19/5'c-5p-5--44I1+L1+E1/16/19/5+H1/19/5'c-5p-5--43I1+L1+E1/16/19/5+H1/19/5'p-5--43I1+L1+E1/16/19/5+H1/19/5'c-5p-5--4I1+L1+E1/16/19/5+H1/19/5'c-5p-5--42I1+L1+E1/16/19/5+H1/19/5'c-5p-5--43c-5p-5--4I1+L1+E1/16/19/5+H1/19/5'c-5p-5--4I1+L1+E1/16/19/5+H1/19/5'2p-5--4I1+L1+E1/16/19/5+H1/19/5'c-5p-5--4I1+L1+E1/16/19/5+H1/19/5'c-5p-5--42c-5p-5--43I1+L1+E1/16/19/5+H1/19/5'c-5p-5--4I1+L1+E1/16/19/5+H1/19/5'c-5p-5--43I1+L1+E1/16/19/5+H1/19/5'c-3I1+L1+E1/16/19/5+H1/19/5'p-5--42I1+L1+E1/16/19/5+H1/19/5'c-5p-5--44I1+L1+E1/16/19/5+H1/19/5'c-5D1/19/5+P1+F1/19+G1/19/5+V1/19.1'p-5--4c-5p-5--42D1/19/5+P1+F1/19+G1/19/5+V1/19.1'p-5--4I1+L1+E1/16/19/5+H1/19/5'c-5p-5--43I1+L1+E1/16/19/5+H1/19/5'p-5--43I1+L1+E1/16/19/5+H1/19/5'c-3p-5--4I1+L1+E1/16/19/5+H1/19/5'c-5p-5--4I1+L1+E1/16/19/5+H1/19/5'c-3c-5p-5--42c-52I1+L1+E1/16/19/5+H1/19/5'p-5--4c-52I1+L1+E1/16/19/5+H1/19/5'p-5--4c-5p-5--4c-5p-5--42c-5p-5--44c-5p-5--4c-5p-5--42c-5p-5--42c-5p-5--4c-52p-5--4p-5--1D1/19/5+P1+F1/19+G1/19/5+V1/19.1'p-5--44c-5I1+L1+E1/16/19/5+H1/19/5'p-5--43c-5I1+L1+E1/16/19/5+H1/19/5'p-5--44c-5p-5--44c-5p-5--43I1+L1+E1/16/19/5+H1/19/5'I1+L1+E1/16/19/5+H1/19/5c4p4-5I1+L1+E1/16/19/5+H1/19/5c5I1+L1+E1/16/19/5+H1/19/5p4-5I1+L1+E1/16/19/5+H1/19/5c4p4-53I1+L1+E1/16/19/5+H1/19/5p4-5I1+L1+E1/16/19/5+H1/19/5c4p4-53I1+L1+E1/16/19/5+H1/19/5p4-6c5I1+L1+E1/16/19/5+H1/19/5p4-54c5I1+L1+E1/16/19/5+H1/19/5p4-5I1+L1+E1/16/19/5+H1/19/52c42p4-53c4p4-52I1+L1+E1/16/19/5+H1/19/52c4p4-52I1+L1+E1/16/19/5+H1/19/5c4p4-5I1+L1+E1/16/19/5+H1/19/5p4-5I1+L1+E1/16/19/5+H1/19/5p4-52c42p4-5c42p4-54I1+L1+E1/16/19/5+H1/19/52p4-5c42p4-53I1+L1+E1/16/19/5+H1/19/5p4-5I1+L1+E1/16/19/5+H1/19/5p4-5c5I1+L1+E1/16/19/5+H1/19/5p4-5c4D1/19/5+P1+F1/19+G1/19/5+V1/19.1c42p4-5I1+L1+E1/16/19/5+H1/19/5p4-5c5I1+L1+E1/16/19/5+H1/19/5p4-52c42p4-5I1+L1+E1/16/19/5+H1/19/5p4-5c42p4-5I1+L1+E1/16/19/5+H1/19/5p4-52c4p4-52c4p4-52I1+L1+E1/16/19/5+H1/19/52c4p4-52I1+L1+E1/16/19/5+H1/19/5c4p4-53c4p4-53c4p4-53c4p4-5c4p4-52p3-5I1+L1+E1/16/19/5+H1/19/5p4-5I1+L1+E1/16/19/5+H1/19/5c43p4-5c42p4-5I1+L1+E1/16/19/5+H1/19/5p4-5c4p4-5I1+L1+E1/16/19/5+H1/19/52p4-52c42D1/19/5+P1+F1/19+G1/19/5+V1/19.1p4-52I1+L1+E1/16/19/5+H1/19/5c4p4-5c4p4-5I1+L1+E1/16/19/5+H1/19/5p4-53I1+L1+E1/16/19/5+H1/19/5p4-52I1+L1+E1/16/19/5+H1/19/5p4-5c4p4-5I1+L1+E1/16/19/5+H1/19/5p4-5c4p4-52I1+L1+E1/16/19/5+H1/19/5p4-52I1+L1+E1/16/19/5+H1/19/5c4p4-5I1+L1+E1/16/19/5+H1/19/5D1/19/5+P1+F1/19+G1/19/5+V1/19.1c6c5I1+L1+E1/16/19/5+H1/19/5p4-5D1/19/5+P1+F1/19+G1/19/5+V1/19.1p3-5p4-52I1+L1+E1/16/19/5+H1/19/54D1/19/5+P1+F1/19+G1/19/5+V1/19.1c6c5I1+L1+E1/16/19/5+H1/19/5p4-5D1/19/5+P1+F1/19+G1/19/5+V1/19.1p3-5p4-52I1+L1+E1/16/19/5+H1/19/5p4-52I1+L1+E1/16/19/5+H1/19/5c4p4-5I1+L1+E1/16/19/5+H1/19/5D1/19/5+P1+F1/19+G1/19/5+V1/19.1c6c5I1+L1+E1/16/19/5+H1/19/52p4-52c5I1+L1+E1/16/19/5+H1/19/5c4p4-5c5I1+L1+E1/16/19/5+H1/19/52p4-52c5I1+L1+E1/16/19/5+H1/19/52p3-5p4-5c5I1+L1+E1/16/19/5+H1/19/5c5I1+L1+E1/16/19/5+H1/19/5p4-5I1+L1+E1/16/19/5+H1/19/5c5I1+L1+E1/16/19/5+H1/19/5p4-5I1+L1+E1/16/19/5+H1/19/5D1/19/5+P1+F1/19+G1/19/5+V1/19.1c6I1+L1+E1/16/19/5+H1/19/5p4-5I1+L1+E1/16/19/5+H1/19/5p4-5I1+L1+E1/16/19/5+H1/19/5p4-5I1+L1+E1/16/19/5+H1/19/5p4-5I1+L1+E1/16/19/5+H1/19/52c2p2-52I1+L1+E1/16/19/5+H1/19/52p3-5p4-53c4D1/19/5+P1+F1/19+G1/19/5+V1/19.1p1-5I1+L1+E1/16/19/5+H1/19/53p4-55c5I1+L1+E1/16/19/5+H1/19/5p4-5c4p4-52I1+L1+E1/16/19/5+H1/19/5p4-52I1+L1+E1/16/19/5+H1/19/5c4p4-52I1+L1+E1/16/19/5+H1/19/5c5I1+L1+E1/16/19/5+H1/19/5p4-5I1+L1+E1/16/19/5+H1/19/52p4-5c5I1+L1+E1/16/19/5+H1/19/5c4p4-5c5I1+L1+E1/16/19/5+H1/19/5p4-52I1+L1+E1/16/19/5+H1/19/5c5I1+L1+E1/16/19/5+H1/19/5p4-5c5I1+L1+E1/16/19/5+H1/19/5p4-57I1+L1+E1/16/19/5+H1/19/52c4p4-52I1+L1+E1/16/19/5+H1/19/5p3-5p4-52I1+L1+E1/16/19/5+H1/19/52p3-5p4-53I1+L1+E1/16/19/5+H1/19/52c5p5-3I1+L1+E1/16/19/5+H1/19/52c32C1/19/5I1+L1+E1/16/19/5+H1/19/52p3-5p4-53c5I1+L1+E1/16/19/5+H1/19/5c5I1+L1+E1/16/19/5+H1/19/5p4-5I1+L1+E1/16/19/5+H1/19/5p4-5c5I1+L1+E1/16/19/5+H1/19/5c4I1+L1+E1/16/19/5+H1/19/52c3C1/19/5I1+L1+E1/16/19/5+H1/19/52p3-5p4-53c5I1+L1+E1/16/19/5+H1/19/5c5I1+L1+E1/16/19/5+H1/19/5p4-5I1+L1+E1/16/19/5+H1/19/5p4-5c5I1+L1+E1/16/19/5+H1/19/5c42I1+L1+E1/16/19/5+H1/19/52p3-5p4-53I1+L1+E1/16/19/5+H1/19/5c5I1+L1+E1/16/19/5+H1/19/5c5I1+L1+E1/16/19/5+H1/19/5p4-5I1+L1+E1/16/19/5+H1/19/5p4-5c5p4-5c4p4-5I1+L1+E1/16/19/5+H1/19/5p4-5c4D1/19/5+P1+F1/19+G1/19/5+V1/19.1I1+L1+E1/16/19/5+H1/19/5p4-5p4-6I1+L1+E1/16/19/5+H1/19/52p4-5c4p4-5I1+L1+E1/16/19/5+H1/19/5p4-5I1+L1+E1/16/19/5+H1/19/5c4p4-5p3-5c4D1/19/5+P1+F1/19+G1/19/5+V1/19.1I1+L1+E1/16/19/5+H1/19/5p4-5p4-6I1+L1+E1/16/19/5+H1/19/52p4-5c4p4-5I1+L1+E1/16/19/5+H1/19/5p4-5I1+L1+E1/16/19/5+H1/19/5c4p4-5I1+L1+E1/16/19/5+H1/19/5p4-5p5-1I1+L1+E1/16/19/5+H1/19/5D1/19/5+P1+F1/19+G1/19/5+V1/19.1p1-5p4-5I1+L1+E1/16/19/5+H1/19/5p4-5c5p4-5c4p4-5I1+L1+E1/16/19/5+H1/19/5p4-52I1+L1+E1/16/19/5+H1/19/52p4-5I1+L1+E1/16/19/5+H1/19/52c2p2-52I1+L1+E1/16/19/5+H1/19/52p3-5p4-52c4D1/19/5+P1+F1/19+G1/19/5+V1/19.1p1-5I1+L1+E1/16/19/5+H1/19/53p4-54I1+L1+E1/16/19/5+H1/19/5c5I1+L1+E1/16/19/5+H1/19/5p4-5c4p4-52I1+L1+E1/16/19/5+H1/19/5p4-52I1+L1+E1/16/19/5+H1/19/5c4p4-52I1+L1+E1/16/19/5+H1/19/5c5I1+L1+E1/16/19/5+H1/19/5p4-5I1+L1+E1/16/19/5+H1/19/52p4-5c5I1+L1+E1/16/19/5+H1/19/5c4p4-5c5I1+L1+E1/16/19/5+H1/19/5p4-52I1+L1+E1/16/19/5+H1/19/5c5I1+L1+E1/16/19/5+H1/19/5p4-5c5I1+L1+E1/16/19/5+H1/19/5p4-57I1+L1+E1/16/19/5+H1/19/52c5I1+L1+E1/16/19/5+H1/19/5p4-5I1+L1+E1/16/19/5+H1/19/5p3-5p4-52I1+L1+E1/16/19/5+H1/19/52p3-5p4-53I1+L1+E1/16/19/5+H1/19/52c5p5-3I1+L1+E1/16/19/5+H1/19/52c32C1/19/5I1+L1+E1/16/19/5+H1/19/52p3-5p4-53c5I1+L1+E1/16/19/5+H1/19/5c5I1+L1+E1/16/19/5+H1/19/5p4-5I1+L1+E1/16/19/5+H1/19/5p4-5c5I1+L1+E1/16/19/5+H1/19/5c4I1+L1+E1/16/19/5+H1/19/52p3-5p4-53c5I1+L1+E1/16/19/5+H1/19/5c5I1+L1+E1/16/19/5+H1/19/5p4-5I1+L1+E1/16/19/5+H1/19/5p4-5c5I1+L1+E1/16/19/5+H1/19/5c42I1+L1+E1/16/19/5+H1/19/52p3-5p4-53I1+L1+E1/16/19/5+H1/19/5c5I1+L1+E1/16/19/5+H1/19/5c5I1+L1+E1/16/19/5+H1/19/5p4-5I1+L1+E1/16/19/5+H1/19/5p4-5c5p4-5c4p4-5I1+L1+E1/16/19/5+H1/19/5p4-5c4D1/19/5+P1+F1/19+G1/19/5+V1/19.1I1+L1+E1/16/19/5+H1/19/5p4-5p4-6I1+L1+E1/16/19/5+H1/19/52p4-5c4p4-53I1+L1+E1/16/19/5+H1/19/5c4p4-52p3-5c4D1/19/5+P1+F1/19+G1/19/5+V1/19.1I1+L1+E1/16/19/5+H1/19/5p4-52p3-5c4D1/19/5+P1+F1/19+G1/19/5+V1/19.1I1+L1+E1/16/19/5+H1/19/5p4-5p4-6I1+L1+E1/16/19/5+H1/19/52p4-5c4p4-5I1+L1+E1/16/19/5+H1/19/5p4-5I1+L1+E1/16/19/5+H1/19/5c4p4-5I1+L1+E1/16/19/5+H1/19/5p4-5p5-1I1+L1+E1/16/19/5+H1/19/5p1-5p4-5I1+L1+E1/16/19/5+H1/19/5p4-5c5p4-5c4p4-5I1+L1+E1/16/19/5+H1/19/5c4D1/19/5+P1+F1/19+G1/19/5+V1/19.1I1+L1+E1/16/19/5+H1/19/5p4-5p4-6I1+L1+E1/16/19/5+H1/19/52p4-5c4p4-5I1+L1+E1/16/19/5+H1/19/5p4-52I1+L1+E1/16/19/5+H1/19/5c4p4-52p3-5c4p4-5I1+L1+E1/16/19/5+H1/19/5p4-53c4p4-5I1+L1+E1/16/19/5+H1/19/52p5-1I1+L1+E1/16/19/5+H1/19/5p4-5I1+L1+E1/16/19/5+H1/19/5p5-1I1+L1+E1/16/19/5+H1/19/5p4-5D1/19/5+P1+F1/19+G1/19/5+V1/19.1p1-5p4-1I1+L1+E1/16/19/5+H1/19/52p4-52p5-1I1+L1+E1/16/19/5+H1/19/5p4-5D1/19/5+P1+F1/19+G1/19/5+V1/19.1p1-5p4-1I1+L1+E1/16/19/5+H1/19/52p4-5p4-6p5-1I1+L1+E1/16/19/5+H1/19/52p4-52c5I1+L1+E1/16/19/5+H1/19/52c5I1+L1+E1/16/19/5+H1/19/52p4-5c5I1+L1+E1/16/19/5+H1/19/5p4-5p4-1p3-5I1+L1+E1/16/19/5+H1/19/52c5I1+L1+E1/16/19/5+H1/19/52c5I1+L1+E1/16/19/5+H1/19/5c4p4-52I1+L1+E1/16/19/5+H1/19/5p5-3c5I1+L1+E1/16/19/5+H1/19/52c4p4-52I1+L1+E1/16/19/5+H1/19/5p5-3c5I1+L1+E1/16/19/5+H1/19/52c4p4-52c5I1+L1+E1/16/19/5+H1/19/5p4-5p4-1I1+L1+E1/16/19/5+H1/19/5c5I1+L1+E1/16/19/5+H1/19/5p4-5c4p4-5I1+L1+E1/16/19/5+H1/19/53p4-5c4p4-5c4p4-5I1+L1+E1/16/19/5+H1/19/5c5I1+L1+E1/16/19/5+H1/19/53p4-52c4D1/19/5+P1+F1/19+G1/19/5+V1/19.1p4-5c4p4-5I1+L1+E1/16/19/5+H1/19/53p4-5c4p4-5c6c5I1+L1+E1/16/19/5+H1/19/5p5-1I1+L1+E1/16/19/5+H1/19/5p4-5I1+L1+E1/16/19/5+H1/19/5D1/19/5+P1+F1/19+G1/19/5+V1/19.1c6p4-5I1+L1+E1/16/19/5+H1/19/54p4-5I1+L1+E1/16/19/5+H1/19/5c4p4-5I1+L1+E1/16/19/5+H1/19/54p4-5I1+L1+E1/16/19/5+H1/19/5p4-5c4p4-52I1+L1+E1/16/19/5+H1/19/54p2-5p4-5c4p4-5p2-5p4-5I1+L1+E1/16/19/5+H1/19/54p2-5p4-5I1+L1+E1/16/19/5+H1/19/5c6p4-5c4p4-52D1/19/5+P1+F1/19+G1/19/5+V1/19.1c6p4-53c4p4-54c4p4-52c4p4-5c4p4-5I1+L1+E1/16/19/5+H1/19/5p4-52I1+L1+E1/16/19/5+H1/19/5c5I1+L1+E1/16/19/5+H1/19/52p4-5I1+L1+E1/16/19/5+H1/19/5p3-5I1+L1+E1/16/19/5+H1/19/5p4-5I1+L1+E1/16/19/5+H1/19/5c4p4-52c4p1-5c4p4-5I1+L1+E1/16/19/5+H1/19/5c4p4-52c4p1-5c4p4-5p2-5A1I1+L1+E1/16/19/5+H1/19/5p4-52p1-3I1+L1+E1/16/19/5+H1/19/5p4-5I1+L1+E1/16/19/5+H1/19/52

### cen2

B2c22p2-3p1-2C2p4-2c1c211B2A2c43p4-2c4D2/20c32p3-1c4p4-2A2c4p4-2A2c4p4-2p1-2A2c42p4-2A2c4p4-2A2p4-2A2c4p4-2A2p4-2A2c4p4-2A2c4p4-2A2p4-2c13A2c1A2p4-2A2c43p4-2A2c4p4-2A2c42p4-1c4p4-2A2c45p4-2A2c43c1p1-2A2p4-1c39p3-1c43p4-2A2c4c3p3-1c4c32C2c36A2c4p4-1c4c32C2c32A2c42p4-2A2c42p4-2A2c49p4-2A2p4-2A2c42p4-12c4p4-1c4p4-2A2c42p4-1c1p1-2A2c4D2/20c3A2p4-1c43p4-2p4-1c42p4-2A2c4D2/20c3A2p4-1c4p4-2A2c4p4-2A2p4-1c4p4-2A2p4-2A2p4-2A2c42p4-2A2p4-1c1p1-2A2c4p4-2A2c4p4-1c42p4-1c1p1-2A2c4p4-1c42p4-1c1A2c44p4-2A2c44p4-1c44p4-1c4p4-2p1-2A2c42p4-1c48p4-1c47p4-1c44p4-2A2c4p4-2A2c4p4-2A2c43p4-2A2c4p4-2A2c4p4-2A2c4p4-2A2c4p4-2A2c4p4-2A2p4-1c4p4-2A2c4p4-2A2c42p4-2c1p1-2A2c4p4-2A2c4p4-2A2c4p4-2A2c4p4-2A2c4p4-2A2c4p4-2A2c4p4-2A2p4-1c4p4-2A2c4p4-2A2c4p4-2A2c4p4-2A2c4p4-2A2c4p4-2c12A2c42p4-1c4p4-1c42p4-1c4p4-1c4p4-2c15A2c44p4-1c4p4-1c42p4-1c43p4-1c42p4-12c16p1-2A2c4p4-1c1p1-2A2c46p4-2A2c42p4-2A2c4p4-1c47p4-1c1p1-2A2c4p4-2A2c4p4-2A2c4p4-2A2c4p4-2c32p3-1c4p4-2A2c43p4-2A2c42p4-1c4p4-2A2c4p4-2A2p4-1c45p4-2A2c4p4-2A2D2/20c3A2p4-1c44p4-2A2c42p4-1c4p4-2A2c4p4-1c12p1-2A2c43p4-1c42p4-2A2c42D2/20c34A2c42p4-2A2c4p4-2A2c46p4-1c4p4-2A2c42p4-2c1p1-2A2c48p4-1c12A2c14p1-2A2c42p4-2A2c4p4-2A2c45p4-2A2c46p4-2A2c46p4-2A2c4p4-1c13p1-2A2c44p4-2A2c44p4-2A2c44p4-2A2c1c3c1A2c1p1-2c1p1-2A2c4p4-2c12A2c1A2c4p4-2A2c44p4-2A2p4-2A2c4p4-2A2c4p4-2A2p4-2A2c4p4-2A2c42D2/20c33A2p4-2A2c4p4-2A2c4p4-2A2c43p4-2A2c4p4-2A2p4-2A2c45p4-2A2p4-2A2c43p4-2A2p4-2A2p4-2A2p4-2A2c42p4-2A2c4p4-2A2c42p4-2A2c42p4-2A2p4-2A2c4p4-2c13p1-2A2p4-2c1p1-2A2c43p4-2A2c4p4-2A2p4-2c4p4-1D2/20c3p3-1c43p4-1D2/20c33p3-1c42p4-2c1A2c42p4-2A2c44p4-1c42p4-2A2c44p4-2p1-2A2p4-1c43p4-2p1-2A2p4-1c43p4-1c42D2/20c4p4-1c45p4-1c42p4-2A2c4D2/20c4B2A2c4c12A2p4-2A2c4D2/20C2B2A2c44D2/20c3A2c4c2B2A2c4D2/20c3A2c43p4-1p4-2A2p4-1c1p1-2A2c42p4-1p4-2A2c43p4-1p4-2A2c4B2A2c43D2/20c3A2c4c22p2-4c42p4-2A2c4D2/20C2B2A2c4p4-1c4D2/20c32p3-4c3A2p4-1c1c3A2c43p4-1c43p4-1c43D2/20c3A2c42D2/20c3A2c43D2/20c3p1-3c2p2-3B2c13A2c43D2/20c3p1-3c2p2-3B2c14c3A2c4D2/20c3A2c4D2/20c3C2c2p2-3B2A2c42p4-2A2c43D2/20c3p1-3c2p2-3B2c13p1-3c2p2-3B2c14c3A2c4D2/20c3A2c1c3A2c4D2/20C2B2A2c42p4-2A2c43p4-1c43p4-2A2p4-2A2c42p4-2A2c4p4-2A2c47p4-2A2c4D2/20c34A2c1p1-2A2c4p4-1p4-2A2c4p4-1c4p4-1c43p4-2A2c4p4-1c42p4-1c43p4-1c43p4-2A2c4p4-1c43p4-1c43p4-1c43p4-2A2c4p4-1p4-2A2c42p4-2A2c43p4-1c4p4-1c43p4-1c42p4-2A2c42p4-2A2c4p4-1c42p4-2A2c4p4-1c45D2/20c4B2A2c4p1-2c2c42D2/20p3-1p4-2c23p2-4c4B2A2c4c12C2B2A2c44D2/20c3A2c42p4-2A2c4D2/20C2B2A2c44D2/20c4c2p2-3c12p3-4C2B2A2c44c12C2B2A2p4-2c4p4-2A2c4D2/20C2B2A2c44p4-2A2c4D2/20c3B2A2c43D2/20c3A2c4c2p2-3B2A2c42D2/20c3A2c4B2A2c42p4-2A2c4D2/20C2B2A2c4p4-1c42D2/20c3A2p4-1c1A2c42p4-2A2c4p4-1c43p4-1c44p4-1c4p4-1c42p4-12c4p4-2A2c4p4-1c4p4-1c4p4-2A2c43p4-13c1c32p3-4c3A2c4c2p2-3B2A2c4p4-1c4p4-2A2c42D2/20c2p4-12c13c3A2c4c2p2-3B2A2c4p4-2A2D2/20C2B2c1A2c4D2/20p2-4c3A2p4-1c1c3A2c43p4-2A2c4D2/20C2B2A2c4D2/20p2-4p4-2A2p4-1c1c3A2c43p4-1p4-2A2c43p4-2A2c4p4-1p4-2A2c4D2/20C2B2A2p4-1p4-2A2c43p4-2A2c4p4-1p4-2A2c4D2/20C2B2A2p4-1c4D2/20c3A2c42D2/20C2B2A2c44B2A2c43D2/20c3A2c4c2B2A2p4-1c1c3A2c43p4-2A2c4D2/20C2B2A2c43B2A2c43D2/20c3A2c4c23p2-4C2B2A2c44B2A2c43D2/20c3A2c4c2B2A2p4-1c1c3A2c43p4-2A2c4D2/20C2B2A2c43B2A2c42p4-2A2c4D2/20C2B2A2c43B2A2c43D2/20c3A2c4c2p2-3B2A2c43D2/20c3A2c4c2B2A2p4-1c1c3A2c43p4-2A2c4D2/20C2B2A2c42B2A2c43c2B2A2p4-1c1c3A2c4p4-2A2c4D2/20C2B2A2c4p4-1c4D2/20c3A2c43D2/20C2B2A2c44c23p2-3B2A2c43D2/20c3A2c4c2B2A2p4-1c1c3A2c43p4-2A2c4c2B2A2p4-1c1c3A2c43p4-2A2c4D2/20C2B2A2c44B2A2c4p4-2A2p4-1c1c3p3-4c3A2c43p4-1p4-2A2c4D2/20C2B2A2c4p4-1c1p1-3B2A2c43D2/20c3A2c4c2B2A2p4-1c1C2B2A2c42D2/20c3A2c4c2p2-4c3A2c4c2p2-4c3A2c4c2B2A2p4-1c1c3A2c43c2B2A2p4-1c1c3A2c45p4-1c1c3A2c43p4-1c1A2c1p1-2A2c42p4-2A2c4D2/20C2B2A2c4p4-1c4D2/20c32A2c4D2/20C2B2A2c4p4-1c1A2c1p1-2A2c42p4-2A2c4D2/20C2B2A2c4p4-1c4D2/20c3A2c42D2/20c3A2p4-1c1c3A2c43p4-2A2c4D2/20C2B2A2c4p4-1c4D2/20c3A2c42D2/20c3A2p4-1c1c3A2c43D2/20C2B2A2c4D2/20C2B2A2p4-2A2D2/20C2B2A2c4p4-1c1c3A2c43p4-1p4-2A2c4D2/20C2B2A2c4p4-1c1A2c1c3A2c43p4-1p4-2A2c4D2/20C2B2A2c4p4-1c1c3A2c4c22p2-4c3A2c43p4-1p4-2A2c4D2/20C2B2A2c42p4-1c1c3A2c4c22c4p4-12c1C2B2A2c4p4-1c1p3-1c4c2p2-3B2A2c42B2A2c42c2B2A2p4-1c1c3A2p4-2A2c4c2B2A2p4-1c1c3A2c42p4-1p4-2A2D2/20C2B2A2c4D2/20C2B2A2p4-2A2c43p4-1p4-2A2D2/20C2B2A2c43p4-1p4-2A2c4D2/20C2B2A2c4D2/20C2B2A2p4-2A2c43D2/20C2B2A2c4D2/20C2B2A2p4-2A2c43p4-1p4-2A2c4D2/20C2B2A2c4D2/20C2B2A2p4-2A2c42p4-1p4-2A2c4D2/20C2B2A2c4D2/20C2B2A2p4-2A2c42p4-1c1p3-1c4c24p2-4c3A2c4c2B2A2p4-1c1c3A2c43p4-1p4-2A2c42D2/20c3A2c4D2/20C2B2A2c4D2/20C2B2A2p4-2A2c43p4-1p4-2A2c4D2/20C2B2A2c4D2/20C2B2A2p4-2A2c43p4-2A2p4-1c1p3-1p4-1c1C2B2A2c42D2/20c32A2p4-1c1c3A2c43p4-1p4-2A2c42p4-1c1p3-1c4c2p2-3B2A2c44D2/20c3A2c4c2B2A2p4-1c14A2p4-2A2c4D2/20C2B2A2c42p4-1p4-2A2c4D2/20C2B2A2c43p4-1p4-2A2c4c23c4p4-2A2p4-1c1C2B2A2c4p4-2A2p4-1c1C2B2A2c42D2/20c3C2c23p4-2A2c4D2/20c3p3-1c1c3A2c4c2c4p4-2A2p4-1c1C2B2A2c4p4-1c1p3-1c12A2c4p4-1c1c3p3-1c4p4-1c1A2c1c3p3-1c4p4-1c1c3p3-1c4p4-1c1A2c1c3p3-1c1A2c1c3p3-1c4p4-1c1c3p3-1c12A2c4p4-1c1c32p3-4c34p3-1c1c34A2c42p4-1A2c1c32p3-1c12A2c4D2/20c32p3-4c33p3-1c1p1-2A2p4-1c4p4-2A2c13p1-2A2c42p4-1A2c1c32p3-1c12A2c4D2/20c32p3-4c33p3-1c1p1-2A2p4-1c4p4-2A2c13A2c1c32p3-42B2A2p4-1c42p4-2A2c12p1-2A2c12p1-2A2c13A2c1A2c12A2c4D2/20c32p3-4c33p3-1c1p1-2A2p4-1c42p4-2A2p4-1c13A2c1c32p3-42B2A2p4-1c42p4-2A2c12p1-2A2c13A2c12A2c4D2/20c32p3-4c33p3-1c1p1-2A2p4-1c42p4-2A2p4-1c12p1-2A2c4D2/20c3p3-1p1-2c42p4-2p4-1p1-2A2c42p4-2A2p4-1p1-2A2c4D2/20c3p3-1c13p1-2A2p4-2A2p4-1c1p1-2A2c4D2/20c3p3-1c13p1-2A2p4-1p1-2A2c43p4-2A2p4-1p1-2A2c4D2/20c3p3-1c13p1-2A2p4-1p1-2c12c32A2p4-1p1-2A2c42D2/20c3p3-1c13c32p4-1p1-2A2c42D2/20c32A2p4-2A2c42D2/20c3p3-4c32A2p4-2A2c42D2/20c32A2p4-2A2c42p4-2A2c4D2/20c3C2p1-2A2c4p4-2A2p4-1c12p1-2A2c4D2/20c32A2p4-1c1c32A2p4-1c1p1-2A2p4-1c1c32A2c42p4-2A2p4-1c1c32A2c42p4-2A2p4-1c12p1-2A2p4-1c13c32A2p4-1c13c32A2p4-1c15p4-2A2p4-1c15c4c2p2-4C2B2A2c43D2/20C2B2A2c45D2/20c4B2A2c4c1p1-2A2p4-1c13c32A2c43D2/20c4B2A2c4c1p1-2A2p4-1c13c32A2p4-1c1c32A2p4-1c1A2c3A2p4-1c13c32A2p4-1c1c32A2p4-2A2p4-1p1-2A2c42p4-2A2p4-1c15c3A2p4-1p1-2A2c42D2/20c32A2p4-1p1-2A2c45D2/20c35p3-4c32A2p4-1p1-2A2c42p4-1c43p4-2c18p1-2A2c46p4-2A2c49p4-2A2c44p4-1p1-2A2c43p4-2A2c4D2/20c3A2c46p4-2c13p1-2A2c44p4-1p1-2A2p4-2A2c44p4-1c15p1-2A2c43p4-1p1-2A2c45p4-2A2c45p4-2c13p1-2A2c410p4-2A2D2/20B2A2c43p4-1c42p4-2A2p4-2A2c48p4-2c12p1-2A2c44p4-2A2c46p4-2A2c42p4-1p1-2A2c43p4-2c13p1-2A2c43p4-2c13p1-2A2c410p4-2A2c43p4-1c42p4-2A2p4-2A2c45p4-2c1A2c42p4-2A2c46p4-2A2c42p4-12p1-2A2c412p4-2A2c43p4-2A2c4p4-2A2c412p4-2A2c413p4-2A2c45D2/20c3p3-4c3A2c42D2/20c3A2c42D2/20c3A2c43D2/20c32p3-4c32A2D2/20c33A2c43p4-1c4p4-2A2c43D2/20c32A2p4-1c43p4-2A2p4-1c45p4-1c4p4-2A2c43D2/20c32A2c44p4-1c43p1-2A2p4-1c43p1-2A2c43p4-1c43p4-2A2c43p4-2A2p4-1c42p4-2A2p4-1c48p4-2A2p4-2A2c42p4-1c4p4-2A2c44p4-1c4p4-2A2c46p4-1c4p4-2A2c42p4-2A2c44p4-1c4c14A2c4p4-2A2c46p4-1c4p4-2A2c44p4-1c44p4-2A2p4-1c44p4-1c45p4-2c44p4-2A2p4-1c44p4-1c45p4-2D2/20C2A2c42p4-2A2c44p4-2A2p4-1c49D2/20c33p3-4c312c412D2/20c311p3-1c4p4-2A2c42p4-2A2p4-2c42p4-2c23B22c16p1-2A2p4-2c4p4-2c2B2c44D2/20c36p3-4c33c415p4-2c3c46p4-2c3c49p4-2c4D2/20c214B2c42p4-2c410D2/20c310c423D2/20c34c4D2/20c214B2c42p4-2c410D2/20c39p3-4c310c423D2/20c36c421p1-2c43p4-2c114p1-2c45D2/20c39c15p1-3c18p1-2A2c44p4-1c4p4-2A2c43p4-1c4p4-2A2c42p4-1c4c14A2c4p4-2A2c44c14A2c44p4-1c42p4-2A2c44p4-2A2p4-1c43p4-2A2p4-1c43p4-2A2p4-1c44p4-1c45p4-2D2/20C2A2c42p4-2A2c42p4-2A2p4-2A2c42p4-2A2p4-2A2c46D2/20c33p3-4c39c412D2/20c311p3-1c4p4-2A2c42p4-2A2p4-2c42p4-2c23B2c23p2-4c38A2p4-2c4p4-2c2B2c44D2/20c36p3-4c33p3-1c12c39c45p4-2c3c46p4-2c3c49p4-2c4D2/20c214B2c425D2/20c310c416p1-2c42D2/20c2B2p1-2c49c14p1-2c45D2/20c311c14p1-3c113p1-3c110p1-3c18p1-3c15p1-2c45D2/20c22B2c44D2/20c22B2c43p4-2c4p4-2c413p4-2c44p4-2A2c42p4-2c410p4-2c22p2-4c36A2p4-2c4p4-2c2B2c46c1c313A2c4p4-2A2p4-2c4p4-2c2B2c47D2/20c3p3-4c27c12c310c48p4-2c45p4-2c44p4-2c45p4-2c47c14p1-2c14p1-2c43c33p3-4c27p2-4c226p2-3c17B2D2/20c210p2-3c13c32C2c14p1-3c159c28B2c46D2/20c25B2c43p4-2B2c4p4-1c36C2c22B2c4c23B2c42p4-2c4c23B2c42p4-2c4c212p2-3C2c4D2/20c36C22c4D2/20p3-4c4D2/20C2c4D2/20

### cen3

p1-4p6-451p6-8p10-4p6-46p6-3p6-44p6-17p16-4p6-42c578p7-4c52p7-5c6c115c1714p4-12c1322p14-5c611p14-5c62p8-5c62p8-5c62p8-5c6p8-13c146p1-4p7-13c142p1-4c529p7-10c11109p4-11c127p1-6p5-6c7p5-11p1-6p5-11p1-11c12p1-6p5-6c7p5-6c7p5-11c12p1-6p5-6c76p8-6c7p8-2c36p8-2c32p8-6c710p8-62c72p8-62p8-10p15-6p8-67p8-16p9-6p8-629p8-4p8-611p8-43p8-6p8-45p8-6p8-4p8-64p8-4p8-6p8-4p8-67C3F3p8-12p1-3F3p8-12p1-3F3p8-6C3F3p8-12p1-3F3p8-12p1-3F3p8-6C3F3p8-12p1-3p6-4F3C3F3H3p10-12A3F3p8-3F3C3F3p8-9p11-12p1-3F3C3F3H3p10-12A3C3p6-4F3C3F3H3p10-13p1-4

### cen4

N4p16-19p5-14H4/9p3-14H4/9p4-14H4/9p10-14H4/9p3-14H4/9p3-14H4/9p4-14H4/9p4-14H4/9J4p4-14H4/9p4-14H4/9p10-14H4/9p3-14H4/9p3-14H4/9p4-14H4/9p3-14H4/9c33p7-10p18-2G4p15-2p7-10p18-11p19-5c22p2-7c155O4p1-10c18p18-5p13-54p13-42p13-5p13-4p13-5p13-4c13p13-1c6p6-1c63p6-18c1A4c63p6-11c194p19-10R4.1p12-10R4.1p12-3p11-1c6p6-1c62p6-18c1p1-18c1A4p6-18c1A4c63p6-13G4p15-2c7p7-2p7-10p18-2p7-2p7-10p18-2p7-22c74c145p14-10p18-2p7-1c6p6-14p6-2p7-5p13-14c14p14-12c12L4c12L4c122p12-2c7p7-22c717p7-19c199p19-14H4/9p16-14H4/9c162p16-14H4/9c16p16-6C4c17p17-6C4p17-14H4/9p16-1c64c13p13-2p7-2p7-18c1A4p6-10p18-2c72p7-2p7-10p18-2p7-2c7p7-2c7p7-2p9-2c9p9-18c13p1-14H4/9p16-6c143p14-6c142p14-6c14p14-1p6-14p6-2c72p7-2c7p7-12c12p12-2p7-1c6p6-2p7-2p7-16c1026p10-19c1914p1-14H4/9p16-14H4/9p16-14H4/9c166p16-14H4/9p16-14H4/9p16-11G4p10-11p13-14H4/9p16-17R4.1A4p6-14H4/9p16-17p4-11p13-14H4/9p16-17p4-14H4/9p16-17p4-14H4/9p16-17p4-14H4/9p16-18p5-14H4/9p16-17p4-14H4/9p16-18p5-14H4/9p16-17p4-14H4/9p16-18p5-14H4/9p16-17p4-14H4/9p16-17c43R4.1p12-10R4.1c12p12-10R4.1c122p12-2c83p8-10R4.1p12-10R4.1c122p12-10R4.1c126p12-10R4.1p12-18c52p5-10R4.1p12-18p5-10R4.1p12-4p12-18p5-8R4.1c128p12-10R4.1c12p12-10R4.1c124p12-10R4.1c122p12-10R4.1c122p12-10R4.1c122p12-10R4.1c12p12-10R4.1p12-10R4.1c123p12-17c316p3-17p19-17c1953p19-12c2p2-12c22p2-18p1-3c17p17-18p1-3c17p17-18p1-3c172p17-18p1-3c17p17-18c1p1-3c11p11-18p1-3c17p17-18p1-3c172p17-18p1-3c17p17-18p1-3c176p17-18p1-3c17p17-18p1-3p17-10R4.1c122p12-18p1-3c17p17-18p1-3p17-10R4.1c12p12-18p1-3c174p17-18p1-3c17p17-18p1-3p17-10R4.1c122p12-18p1-3c17p17-18p1-3p17-10R4.1c12p12-18p1-3c178p17-4c12p12-18p1-3c17p17-18p1-3c174p17-18p1-3c17p17-18p1-3p17-10R4.1p12-3c17p17-18p1-3c177p17-18p1-3c17p17-18p1-3p17-10R4.1c73p7-18p1-3c17p17-18p1-3p17-10R4.1p12-3c17p17-18p1-3c174p17-18c13p1-18c19p1-18p1-3c1715p17-18c113p1-18p1-3c17p17-18p1-3p17-3c162p16-18p1-3c17p17-18p1-3c175p17-18p1-3c17p17-18c12p1-18p1-3c172p17-18c12p1-18p1-3c175p17-18p1-3c173p17-18p1-3c17p17-18p1-3p17-5p16-18p1-3c173p17-18p1-3c172p17-18p1-3c176p17-18p1-3c17p17-18p1-3c172p17-3p11-4c12p12-18p1-3c17p17-18p1-3c17p17-18p1-3c17p17-18p1-3c167p16-18p1-3c17p17-18p1-3c17p17-18p1-3c174p17-18p1-3c17p17-18p1-3c17p17-18p1-3p17-10R4.1p12-3c172p17-18c112p1-18p1-3c175p17-18p1-3c172p17-18p1-3c17p17-18p1-3c17p17-18p1-3c17p17-18p1-3c173p17-18p1-3c17p17-18p1-3c10p10-18p1-3c17p17-3c172p17-18p1-15c172p17-18A4p2-18p1-3c17p17-18c1p1-18p1-3c17p17-18p1-3c17p17-18c12p1-18p1-3c174p17-18p1-3c17p17-18p1-3c17p17-18p1-3p17-3c173p17-18p1-3c172p17-18p1-3c176p17-18p1-3c17p17-18p1-3c172p17-5c22p2-18p1-3c17p17-18p1-3c17p17-18p1-3c17p17-18A4p2-18p1-3p17-3c173p17-18p1-3c1712p17-18p1-3c173p17-18p1-18p1-3c17p17-18p1-3c17p17-18p1-3p17-19p5-18p1-3p17-19p5-18p1-3c17p17-18p1-3c17p17-18p1-3c172p17-18p1-18p1-11p1-5p13-5c13p13-18p1-11p1-5p13-5c13p13-18p1-11p1-5c13p16-125p16-10R4.1p12-15p1-12p16-12c16p16-12p6-10R4.1c124p12-10R4.1p12-10R4.1p12-18c1p1-18p1-3p17-19p5-18p1-3c17p17-18p1-3c172p17-18p1-18p1-11p1-5c13p16-129p16-10R4.1c123L4p6-10R4.1c12L4p6-10R4.1c122p12-10R4.1p12-10R4.1c122p12-18p1-3c17p17-18p1-3c17p17-18p1-3c17p17-18p1-18c1p1-18p1-3c17p17-18p1-3c17p17-18p1-3c17p17-18p1-3p17-19p5-18p1-3c172p17-18p1-4S4p5-18p1-11p1-5c13p16-11p1-5c22p2-10R4.1p12-10R4.1p12-10R4.1p12-10R4.1p12-10R4.1p12-10R4.1p12-10R4.1p12-10R4.1p12-10R4.1p12-10R4.1p12-10R4.1p12-10R4.1p12-10R4.1p12-10R4.1p12-10R4.1p12-10R4.1p12-10R4.1p12-18p5-10R4.1p12-10R4.1p12-42p12-10R4.1p12-10R4.1p12-10c47p4-18p1-3c172p17-18p1-3c174p17-18p1-3c173p17-18p1-3c17p17-10R4.1p12-10R4.1c123p12-18p1-3c17p17-10R4.1p12-10R4.1c123p12-18p1-3Q4c4p4-10R4.1c122p12-18p1-3c17p17-3c172p17-18p1-3c17p17-3c176p17-18p1-3c17p17-2p14-3c172p17-18c17p1-18c12p1-18p1-3c172p17-18p1-3c17p17-3p17-19c5p5-3p17-10R4.1c12p12-10R4.1c12p12-10R4.1c122p12-6p8-18p1-3c1715p17-18p1-3c17p17-9p3-4c12p12-19c1p1-18p1-3c17p17-18p1-3c17p17-3c17p17-18c12p1-18c1p1-2p7-10p18-1p6-2c75p7-2c72p7-10p4-5p13-4p12-2p7-4p12-2p7-4p12-2c74p7-1p6-10p18-1c6p6-2c72p7-14H4/9c163p16-1p6-2c74p7-18c58p5-11c53p5-8p2-18p1-3c17p17-18p1-3c172p17-4p1-10R4.1c122p12-4p1-10R4.1c12p12-19p5-10R4.1c12p12-17p19-4p1-10R4.1p12-4c17p1-4c1p1-4p1-10R4.1p12-3p11-4p1-10R4.1c125p12-4c1p1-4p1-10R4.1c12p12-4c12p12-14H4/9p16-17c4R4.1c12p12-14H4/9p16-17p4-14H4/9p16-17c4p4-10R4.1p12-10R4.1c12p12-4c12p12-4c12p12-14H4/9p16-17p4-14H4/9p16-17c4p4-10R4.1c12p12-4p1-10R4.1c12p12-4c1p1-10R4.1c122p12-17c42R4.1c13p1-4p1-10R4.1p12-4c1p1-4p1-10R4.1c12p12-4p1-10R4.1p12-13p19-10R4.1p12-13S4p12-10R4.1c12p12-13c153p15-10R4.1c12p12-10R4.1c12p12-10R4.1c124p12-4c1p1-4p1-9p3-4c12p12-4p1-10R4.1c12p12-4p1-4c1p1-4p1-10R4.1p12-4c1p1-4c1p1-4c1p1-4c1p1-15p18-4p13-52c13p13-8p2-12p2-8c2p2-18c12p1-184p1-5c133p13-9c54E4p13-11E4c132p13-17p4-6p14-6c147p14-12c66p6-12p6-15c12p1-12c68p6-7c7G4c7G4c7G4c7G4c7p7-14H4/9p16-14H4/9p16-14H4/9c16p16-14H4/9p16-14H4/9p16-14H4/9c16p16-14H4/9c16p16-14H4/9p16-19p5-11G4p10-11p13-14H4/9p16-17R4.1p1-2N4H4/9C4p11-14H4/9p16-2N4H4/9p3-8p16-2H4/9p3-8p16-2H4/9p3-10p18-2H4/9p16-17p5-14H4/9p16-17p4-11p13-14H4/9p16-17p4-14H4/9p16-17p4-14H4/9p16-17p4-14H4/9p16-17p4-14H4/9p16-17p4-14H4/9p16-17p4-14H4/9p16-17p4-14H4/9p16-2G4p10-14H4/9p16-1p7-8p10-14H4/9p16-2p7-8p10-14H4/9p16-1p7-8p10-14p16-2p7-8p10-14p16-2p7-8p10-14H4/9p16-2p7-8p10-14H4/9p16-2p7-8p10-13p18-2p7-8p10-14H4/9p16-2p7-8p10-13p18-2p7-8p10-14H4/9p16-2p7-8p10-13p18-2p7-8p10-14H4/9p16-2p7-8p10-13p18-2p7-8p10-14H4/9p16-2p7-8p10-13p18-2p7-8p10-14H4/9p16-2p7-8p10-14H4/9p16-2p7-8p10-14H4/9p16-2p7-8p10-14H4/9p16-2p7-8p10-14H4/9p16-2p7-8p10-14H4/9p16-2p7-8p10-14H4/9p16-2p7-8p10-14H4/9p16-2p7-8p10-14H4/9p16-2p7-8p10-14H4/9p16-2p7-8p10-2p7-8p10-14H4/9p16-2p7-8p10-14H4/9p16-2p7-8p10-14H4/9p16-2p7-8p10-14H4/9p16-2p7-8p10-14H4/9p16-2p7-8p10-15p17-2p7-8p10-15p17-2p7-8p10-14H4/9p17-2p7-8p10-14H4/9p16-2p7-8p10-14H4/9p16-2p7-8p10-14H4/9p16-2p7-8p10-14H4/9p16-2p7-8p10-14H4/9p16-2p7-8p10-14H4/9p16-2p7-8p10-14H4/9p16-2G4H4/9p16-2p7-8p10-14H4/9p16-2p7-8p10-14H4/9p16-2p7-8p10-14H4/9p16-2p7-8p10-14H4/9p16-2p7-8p10-14H4/9p16-2p7-8p10-14H4/9p16-2p7-8p10-14H4/9p16-2p7-8p10-14H4/9p16-2p7-8p10-14H4/9p16-2p7-8p10-14H4/9p16-2p7-8p10-14H4/9p16-17p11-14H4/9p16-2p7-8p10-14H4/9p16-2p7-8p10-14H4/9p16-2H4/9p10-14H4/9p16-2p7-8p10-14H4/9p16-18p1-2p7-8p17-18B4G4p6-11S4p12-14H4/9p16-2H4/9p16-19p5-9p10-13p7-14H4/9p16-18p8-142p5-7N4H4/9p16-11M4p1-11p19-10p19-13p3-8p13-1N4H4/9p16-17R4.1B4N4H4/9p3-5H4/9

### cen5

p1-5P5E1/16/19/5P5p5-1R1/19/5E1/16/19/5P5p5-1p3-5P5c5E1/16/19/5P5p5-1R1/19/5c5E1/16/19/5P5p5-1R1/19/5E1/16/19/5p2-5P5p5-1R1/19/5c5p1-5P5p5-6E1/16/19/5P5E1/16/19/5P5p5-1R1/19/5E1/16/19/5p3-5P5c5E1/16/19/5P5p5-1R1/19/5E1/16/19/5p2-5P5p5-1R1/19/5p5-1R1/19/5E1/16/19/5P5p5-1R1/19/5c5E1/16/19/5P5p5-1p3-5P5c5E1/16/19/5P5p5-1R1/19/5c5E1/16/19/5P5p5-1R1/19/5E1/16/19/5p2-5P5p5-1R1/19/5E1/16/19/5p2-5P5p5-1R1/19/5c5E1/16/19/5P5p5-1R1/19/5p1-4A1/16/19/5R1/19/5p5-3p5-1R1/19/5E1/16/19/5p2-5P5p5-1R1/19/5p5-1R1/19/5p5-1R1/19/5c5E1/16/19/5P5p5-1R1/19/5c5E1/16/19/5P5p5-1R1/19/5p5-1R1/19/5c5E1/16/19/5P5p5-1R1/19/5p5-1R1/19/5E1/16/19/5p3-5P5p5-1R1/19/5c5E1/16/19/5P5p5-1R1/19/5p5-1R1/19/5p5-1R1/19/5c5E1/16/19/5P5p5-1R1/19/5p5-1R1/19/5c5E1/16/19/5P5p5-1R1/19/5E1/16/19/5p2-5P5p5-1R1/19/5p2-5P5p5-1R1/19/5c5E1/16/19/5P5p5-1R1/19/5p1-4A1/16/19/5R1/19/5p5-3p5-1R1/19/5c5E1/16/19/5P5p5-6p3-5P5p5-1R1/19/5p5-1R1/19/5c5p5-1R1/19/5E1/16/19/5p2-5P5c5E1/16/19/5P5p5-1R1/19/5c5E1/16/19/5P5c5E1/16/19/5P5p5-1R1/19/5p5-1R1/19/5c5E1/16/19/5P5p5-1R1/19/5c5E1/16/19/5P5p5-1R1/19/5E1/16/19/5P5p5-6E1/16/19/5P5E1/16/19/5P5p5-1R1/19/5E1/16/19/5p3-5P5c5E1/16/19/5P5p5-1R1/19/5E1/16/19/5p2-5P5p5-1R1/19/5p5-1R1/19/5E1/16/19/5P5p5-1R1/19/5c5E1/16/19/5P5p5-1p3-5P5c5E1/16/19/5P5p5-1R1/19/5c5E1/16/19/5P5p5-1R1/19/5E1/16/19/5p2-5P5p5-1R1/19/5E1/16/19/5p2-5P5p5-1R1/19/5c5E1/16/19/5P5p5-1R1/19/5p1-4A1/16/19/5R1/19/5p5-1R1/19/5p1-4A1/16/19/5R1/19/5p5-3p5-1R1/19/5E1/16/19/5p2-5P5p5-1R1/19/5p5-1R1/19/5p5-1R1/19/5c5E1/16/19/5P5p5-1R1/19/5c5E1/16/19/5P5p5-1R1/19/5p5-1R1/19/5c5E1/16/19/5P5p5-1R1/19/5p5-1R1/19/5E1/16/19/5p3-5P5p5-1R1/19/5c5E1/16/19/5P5p5-1R1/19/5p5-1R1/19/5p5-1R1/19/5c5E1/16/19/5P5p5-1R1/19/5p5-1R1/19/5c5E1/16/19/5P5p5-1R1/19/5E1/16/19/5p2-5P5p5-1R1/19/5E1/16/19/5p2-5P5p5-1R1/19/5c5E1/16/19/5P5p5-1R1/19/5p1-5P5p5-6p3-5P5p5-1R1/19/5p5-1R1/19/5c5p5-1R1/19/5E1/16/19/5p2-5P5c5E1/16/19/5P5p5-1R1/19/5p3-5P5p5-1R1/19/5c5E1/16/19/5P5p5-1R1/19/5p5-1R1/19/5p3-5P5c5E1/16/19/5P5p5-1R1/19/5p5-1R1/19/5c5p5-1R1/19/5E1/16/19/5c2p2-5P5c5E1/16/19/5P5p5-1R1/19/5p3-5P5p5-1R1/19/5c5E1/16/19/5P5p5-1R1/19/5c5p5-1R1/19/5p3-5P5p5-6E1/16/19/5P5p5-1R1/19/5p5-1R1/19/5c5E1/16/19/5P5p5-1R1/19/5p3-5P5p5-1R1/19/5E1/16/19/5p4-5P5c5E1/16/19/5P5c5E1/16/19/5P5c5p5-6p5-1R1/19/5p5-1R1/19/5p5-1R1/19/5p3-5P5c5E1/16/19/5P5c5E1/16/19/5P5c5E1/16/19/5P5p5-1R1/19/5c5E1/16/19/5P5p5-1R1/19/5c5E1/16/19/5P5p5-1R1/19/5c5E1/16/19/5P5p5-1R1/19/5c5E1/16/19/5P5p5-1R1/19/5c5E1/16/19/5P5p5-1R1/19/5p3-5P5p5-1R1/19/5p4-5P5p5-6R1/19/5p3-5P5p5-1R1/19/5c5E1/16/19/5P5c5p3-5P5p5-1R1/19/5c5p3-5P5p5-6p5-1R1/19/5p5-1R1/19/5p5-1R1/19/5c5E1/16/19/5P5p5-1R1/19/5c5E1/16/19/5P5p5-1R1/19/5c5E1/16/19/5P5c5p5-1R1/19/5c5p5-1R1/19/5c5E1/16/19/5P5c5E1/16/19/5P5p5-1R1/19/5c5E1/16/19/5P5p5-1R1/19/5c5E1/16/19/5P5p5-1R1/19/5c5E1/16/19/5P5p5-1R1/19/5p5-1R1/19/5p5-6p3-5P5p5-1R1/19/5p5-1R1/19/5c5E1/16/19/5P5p5-1R1/19/5p5-1R1/19/5p5-1R1/19/5p5-1R1/19/5p5-1R1/19/5c5E1/16/19/5P5p5-1R1/19/5p5-1R1/19/5p5-1R1/19/5p5-1R1/19/5p5-1R1/19/5c5E1/16/19/5P5p5-1R1/19/5p5-1R1/19/5p5-6p5-1R1/19/5c5E1/16/19/5P5p5-1R1/19/5c5E1/16/19/5P5p5-1R1/19/5p5-3P5p5-1R1/19/5p5-1R1/19/5p5-1R1/19/5p5-1R1/19/5c5p5-1R1/19/5c5E1/16/19/5P5p5-1R1/19/5p5-1R1/19/5c5p5-1R1/19/5c5E1/16/19/5P5p5-1R1/19/5p5-1R1/19/5p5-1R1/19/5p5-1R1/19/5c5E1/16/19/5P5p5-1R1/19/5c5E1/16/19/5P5p5-1R1/19/5c5E1/16/19/5P5p5-1R1/19/5p5-1R1/19/5p5-1R1/19/5p5-1R1/19/5c5E1/16/19/5P5p5-1R1/19/5c5E1/16/19/5P5p5-1R1/19/5c5E1/16/19/5P5p5-1R1/19/5p5-1R1/19/5p5-1R1/19/5c5E1/16/19/5P5p5-1R1/19/5c5E1/16/19/5P5p5-1R1/19/5c5E1/16/19/5P5p5-1R1/19/5c5E1/16/19/5P5p5-1R1/19/5c5E1/16/19/5P5c5E1/16/19/5P5p5-1R1/19/5c5E1/16/19/5P5p5-1R1/19/5c5E1/16/19/5P5p5-1R1/19/5c5E1/16/19/5P5p5-1R1/19/5p5-1R1/19/5p5-1R1/19/5p5-1R1/19/5c5E1/16/19/5P5p5-1R1/19/5p5-1R1/19/5p5-1R1/19/5p5-1R1/19/5p5-1R1/19/5c5E1/16/19/5P5p5-1R1/19/5p5-1R1/19/5p5-1R1/19/5p5-1R1/19/5p5-1R1/19/5c5E1/16/19/5P5p5-1R1/19/5c5E1/16/19/5P5p5-1R1/19/5c5E1/16/19/5P5p5-1R1/19/5p5-1R1/19/5c5E1/16/19/5P5p5-1R1/19/5c5E1/16/19/5P5p5-1R1/19/5c5E1/16/19/5P5p5-1R1/19/5p5-1R1/19/5p5-1R1/19/5p5-1R1/19/5c5E1/16/19/5P5p5-1R1/19/5p5-1R1/19/5p5-1R1/19/5p5-1R1/19/5p5-1R1/19/5c5E1/16/19/5P5p5-1R1/19/5p5-1R1/19/5p5-1R1/19/5p5-1R1/19/5c5E1/16/19/5P5p5-1R1/19/5p5-1R1/19/5p5-1R1/19/5p5-1R1/19/5c5E1/16/19/5P5p5-1R1/19/5p5-1R1/19/5c5E1/16/19/5P5p5-1R1/19/5p5-1R1/19/5c5E1/16/19/5P5p5-1R1/19/5c5E1/16/19/5P5p5-1R1/19/5p5-1R1/19/5p5-1R1/19/5p5-1R1/19/5p5-1R1/19/5c5E1/16/19/5P5p5-1R1/19/5p5-1R1/19/5p5-1R1/19/5p5-1R1/19/5p5-1R1/19/5c5E1/16/19/5P5p5-1R1/19/5p5-1R1/19/5p5-1R1/19/5p5-1R1/19/5c5E1/16/19/5P5p5-1R1/19/5p5-1R1/19/5p5-1R1/19/5p5-1R1/19/5c5E1/16/19/5P5p5-1R1/19/5p5-1R1/19/5c5E1/16/19/5P5p5-1R1/19/5p5-1R1/19/5c5E1/16/19/5P5p5-1R1/19/5c5E1/16/19/5P5p5-1R1/19/5p5-1R1/19/5p5-1R1/19/5c5E1/16/19/5P5p5-1R1/19/5c5E1/16/19/5P5p5-1R1/19/5p5-1R1/19/5E1/16/19/5p2-5P5p5-1R1/19/5E1/16/19/5P5p1-5P5p5-1R1/19/5c5E1/16/19/5P5p5-1R1/19/5c5E1/16/19/5P5p5-1R1/19/5p5-1R1/19/5p5-1R1/19/5p5-1R1/19/5c5E1/16/19/5P5p5-1R1/19/5p5-1R1/19/5p5-1R1/19/5p5-1R1/19/5p5-1R1/19/5c5E1/16/19/5P5p5-1R1/19/5p5-1R1/19/5p5-1R1/19/5p5-1R1/19/5p5-1R1/19/5p5-1R1/19/5p5-1R1/19/5p5-1R1/19/5c5E1/16/19/5P5p5-1R1/19/5p5-1R1/19/5p5-1R1/19/5p5-1R1/19/5p5-1R1/19/5c5E1/16/19/5P5p5-1R1/19/5p5-1R1/19/5p5-1R1/19/5p5-1R1/19/5p5-1R1/19/5c5E1/16/19/5P5p5-1R1/19/5c5E1/16/19/5P5p5-1R1/19/5c5E1/16/19/5P5p5-1R1/19/5p5-1R1/19/5c5E1/16/19/5P5p5-1R1/19/5c5E1/16/19/5P5p5-1R1/19/5c5E1/16/19/5P5p5-1R1/19/5p5-1R1/19/5p5-1R1/19/5p5-1R1/19/5p5-1R1/19/5c5E1/16/19/5P5p5-1R1/19/5c5E1/16/19/5P5p5-1R1/19/5c5E1/16/19/5P5p5-1R1/19/5p5-1R1/19/5p5-1R1/19/5p5-1R1/19/5p5-1R1/19/5c5E1/16/19/5P5p5-1R1/19/5p5-1R1/19/5p5-1R1/19/5p5-1R1/19/5p5-6p5-1R1/19/5p5-1R1/19/5p5-1R1/19/5c5E1/16/19/5P5p5-1R1/19/5p5-1R1/19/5p5-1R1/19/5p5-1R1/19/5p5-1R1/19/5p5-1R1/19/5p5-1R1/19/5p5-1R1/19/5c5E1/16/19/5P5p5-1R1/19/5p5-1R1/19/5p5-1R1/19/5c5E1/16/19/5P5p5-1R1/19/5c5E1/16/19/5P5p5-1R1/19/5c5E1/16/19/5P5p5-1R1/19/5p5-1R1/19/5p5-1R1/19/5p5-1R1/19/5p5-1R1/19/5c5E1/16/19/5P5p5-1R1/19/5c5E1/16/19/5P5p5-1R1/19/5c5E1/16/19/5P5p5-1R1/19/5p5-1R1/19/5p5-1R1/19/5p5-1R1/19/5p5-1R1/19/5c5E1/16/19/5P5p5-1R1/19/5p5-1R1/19/5p5-1R1/19/5p5-1R1/19/5p5-1R1/19/5p5-1R1/19/5p5-1R1/19/5p5-1R1/19/5c5E1/16/19/5P5p5-1R1/19/5p5-1R1/19/5p5-1R1/19/5p5-1R1/19/5c5E1/16/19/5P5p5-1R1/19/5p5-1R1/19/5c5E1/16/19/5P5p5-1R1/19/5p5-1R1/19/5c5E1/16/19/5P5p5-1R1/19/5c5E1/16/19/5P5p5-1R1/19/5p5-1R1/19/5p5-1R1/19/5c5E1/16/19/5P5p5-1R1/19/5c5E1/16/19/5P5p5-1R1/19/5p5-1R1/19/5p5-1R1/19/5c5E1/16/19/5P5p5-1R1/19/5c5E1/16/19/5P5p5-1R1/19/5p5-1R1/19/5E1/16/19/5p2-5P5p5-1R1/19/5E1/16/19/5P5p1-5P5p5-1R1/19/5c5E1/16/19/5P5p5-1R1/19/5c5E1/16/19/5P5p5-1R1/19/5p5-1R1/19/5p5-1R1/19/5p5-1R1/19/5c5E1/16/19/5P5p5-1R1/19/5p5-1R1/19/5p5-1R1/19/5p5-1R1/19/5c5p5-1R1/19/5c5A1/16/19/5R1/19/5c5E1/16/19/5P5p1-5P5p5-1R1/19/5p5-1R1/19/5c5E1/16/19/5P5p5-1R1/19/5c5E1/16/19/5P5p5-1R1/19/5E1/16/19/5p2-5P5c5E1/16/19/5P5p5-1R1/19/5p5-1R1/19/5p5-1R1/19/5c5E1/16/19/5P5p5-1R1/19/5c5E1/16/19/5P5p5-1R1/19/5E1/16/19/5p2-5P5c5E1/16/19/5P5p5-1R1/19/5p5-1R1/19/5p5-1R1/19/5c5E1/16/19/5P5p5-1R1/19/5c5E1/16/19/5P5p5-1R1/19/5p5-1R1/19/5c5E1/16/19/5P5p5-1R1/19/5p5-1R1/19/5E1/16/19/5p3-5P5p5-1R1/19/5c5E1/16/19/5P5p5-1R1/19/5p5-1R1/19/5p5-1R1/19/5c5E1/16/19/5P5p5-1R1/19/5p5-1R1/19/5c5E1/16/19/5P5p5-1R1/19/5p5-1R1/19/5p5-1R1/19/5p5-1R1/19/5p5-1R1/19/5p5-1R1/19/5p5-1R1/19/5c5E1/16/19/5P5p5-1R1/19/5p5-1R1/19/5p5-1R1/19/5p5-1R1/19/5p5-1R1/19/5p5-1R1/19/5p5-1R1/19/5c5E1/16/19/5P5p5-1R1/19/5p5-1R1/19/5p5-1R1/19/5p5-1R1/19/5p5-1R1/19/5c5E1/16/19/5P5p5-1R1/19/5p5-1R1/19/5p5-1R1/19/5c5E1/16/19/5P5p5-1R1/19/5p5-1R1/19/5p5-1R1/19/5c5E1/16/19/5P5c5p5-1R1/19/5c5E1/16/19/5P5p5-1R1/19/5c5p5-1R1/19/5c5E1/16/19/5P5p5-1R1/19/5c5E1/16/19/5P5p5-1R1/19/5p5-1R1/19/5c5p5-1R1/19/5c5E1/16/19/5P5p5-1R1/19/5p5-3p5-1R1/19/5p5-1R1/19/5c5E1/16/19/5P5p5-1R1/19/5c5p5-1R1/19/5c5E1/16/19/5P5p5-1R1/19/5p5-1R1/19/5c5E1/16/19/5P5p5-1R1/19/5p5-1R1/19/5c5E1/16/19/5P5p5-1R1/19/5c5p5-1R1/19/5c5E1/16/19/5P5p5-1R1/19/5p5-1R1/19/5c5E1/16/19/5P5p5-1R1/19/5p5-1R1/19/5c5E1/16/19/5P5p5-1R1/19/5p5-1R1/19/5c5E1/16/19/5P5p5-1R1/19/5c5E1/16/19/5P5p5-1R1/19/5p5-1R1/19/5c5E1/16/19/5P5p5-1R1/19/5p5-1R1/19/5p5-1R1/19/5p5-1R1/19/5c5E1/16/19/5P5p5-1R1/19/5p5-1R1/19/5c5E1/16/19/5P5p5-1R1/19/5c5E1/16/19/5P5p5-1R1/19/5p5-1R1/19/5p5-1R1/19/5c5E1/16/19/5P5p5-1R1/19/5p5-1R1/19/5c5E1/16/19/5P5p5-1R1/19/5p5-1R1/19/5c5E1/16/19/5P5p5-1R1/19/5p5-1R1/19/5E1/16/19/5P5c5E1/16/19/5P5E1/16/19/5P5c5E1/16/19/5P5E1/16/19/5P5p5-1R1/19/5E1/16/19/5P5c5E1/16/19/5P5p6-1R1/19/5c5E1/16/19/5P5p5-1R1/19/5p5-1R1/19/5p5-1R1/19/5c5E1/16/19/5P5p5-1R1/19/5p5-1R1/19/5p5-1R1/19/5p5-1R1/19/5c52E1/16/19/5P5p5-1R1/19/5p5-1R1/19/5c5E1/16/19/5P5p5-1R1/19/5c5E1/16/19/5P5p5-1R1/19/5c5E1/16/19/5P5p5-1R1/19/5p5-1R1/19/5p5-1R1/19/5c5E1/16/19/5P5p5-1R1/19/5c5E1/16/19/5P5p5-1R1/19/5c5E1/16/19/5P5p5-1R1/19/5p5-1R1/19/5p5-1R1/19/5c5E1/16/19/5P5p5-1R1/19/5p5-1R1/19/5p5-1R1/19/5c5E1/16/19/5P5c5E1/16/19/5P5c5E1/16/19/5P5A1/16/19/5R1/19/5p5-1R1/19/5p5-6c5E1/16/19/5P5c5E1/16/19/5P5p5-1R1/19/5p5-1R1/19/5p5-1R1/19/5c5E1/16/19/5P5p5-1R1/19/5p5-1R1/19/5p5-1R1/19/5c5p5-1R1/19/5c5E1/16/19/5P5p5-1R1/19/5p5-1R1/19/5p5-1R1/19/5c5E1/16/19/5P5p5-1R1/19/5p5-1R1/19/5p5-1R1/19/5c5E1/16/19/5P5p5-1R1/19/5p5-1R1/19/5c5E1/16/19/5P5p5-1R1/19/5p5-1R1/19/5c5E1/16/19/5P5p5-1R1/19/5p5-1R1/19/5c5E1/16/19/5P5p5-1R1/19/5p5-1R1/19/5p5-1R1/19/5c5E1/16/19/5P5p5-1R1/19/5p5-1R1/19/5p5-1R1/19/5c5E1/16/19/5P5c5E1/16/19/5P5E1/16/19/5P5p5-1R1/19/5p5-1R1/19/5p5-1R1/19/5c5E1/16/19/5P5c5E1/16/19/5P5p5-1R1/19/5p5-1R1/19/5p5-1R1/19/5c5E1/16/19/5P5p5-1R1/19/5p5-1R1/19/5p5-1R1/19/5c5E1/16/19/5P5c5E1/16/19/5P5c5E1/16/19/5P5p5-1R1/19/5c5E1/16/19/5P5c5E1/16/19/5P5c5E1/16/19/5P5p5-1R1/19/5p5-1R1/19/5p5-1R1/19/5c5E1/16/19/5P5c5E1/16/19/5P5p5-1R1/19/5p5-1R1/19/5p5-1R1/19/5c5E1/16/19/5P5c5E1/16/19/5P5p5-1R1/19/5p5-1R1/19/5p5-1R1/19/5c5E1/16/19/5P5p5-1R1/19/5p5-1R1/19/5p5-1R1/19/5c5E1/16/19/5P5p5-1R1/19/5p5-1R1/19/5c5E1/16/19/5P5p5-1R1/19/5c5E1/16/19/5P5c5E1/16/19/5P5c5E1/16/19/5P5p5-1R1/19/5p5-1R1/19/5p5-1R1/19/5c5E1/16/19/5P5p5-1R1/19/5p5-1R1/19/5c5E1/16/19/5P5p5-1R1/19/5p5-1R1/19/5c5E1/16/19/5P5p5-1R1/19/5p5-1R1/19/5c5E1/16/19/5P5c5E1/16/19/5P5p5-1R1/19/5p5-1R1/19/5E1/16/19/5P5p5-1R1/19/5p5-1R1/19/5p5-1R1/19/5p5-1R1/19/5p5-3P5p5-1R1/19/5p5-1R1/19/5p5-1R1/19/5p5-1R1/19/5c5E1/16/19/5P5c5E1/16/19/5P5p5-1R1/19/5p5-1R1/19/5E1/16/19/5P5p5-1R1/19/5p5-1R1/19/5p5-1R1/19/5p5-1R1/19/5p5-3P5p5-1R1/19/5p5-1R1/19/5p5-1R1/19/5p5-1R1/19/5c5E1/16/19/5P5c5E1/16/19/5P5p5-1R1/19/5p5-1R1/19/5p5-1R1/19/5p5-1R1/19/5p5-3P5p5-1R1/19/5p5-1R1/19/5p5-1R1/19/5p5-1R1/19/5c5E1/16/19/5P5p5-1R1/19/5p5-1R1/19/5p5-3P5p5-1R1/19/5p5-3P5p5-1E1/16/19/5P5p5-1R1/19/5p5-1R1/19/5c5E1/16/19/5P5p5-1R1/19/5p5-1R1/19/5c5E1/16/19/5P5E1/16/19/5p4-5P5c5E1/16/19/5P5p5-1R1/19/5p5-1R1/19/5p5-1R1/19/5c5E1/16/19/5P5p5-1R1/19/5p5-1R1/19/5p5-1R1/19/5c5E1/16/19/5P5p5-1R1/19/5p5-1R1/19/5p5-1R1/19/5c5E1/16/19/5P5p5-1R1/19/5p5-1R1/19/5p5-1R1/19/5c5E1/16/19/5P5p5-1R1/19/5p5-1R1/19/5p5-1R1/19/5c5E1/16/19/5P5p5-1R1/19/5p5-1R1/19/5p5-1R1/19/5c5E1/16/19/5P5c5p5-1R1/19/5c5E1/16/19/5P5p5-1R1/19/5p5-1R1/19/5p5-1R1/19/5c5E1/16/19/5P5p5-1R1/19/5p5-1R1/19/5p5-1R1/19/5c5E1/16/19/5P5p5-1R1/19/5p5-1R1/19/5p5-1R1/19/5c5E1/16/19/5P5p5-1R1/19/5p5-1R1/19/5p5-1R1/19/5c5E1/16/19/5P5p5-1R1/19/5p5-1R1/19/5p5-1R1/19/5c5E1/16/19/5P5p5-1R1/19/5p5-1R1/19/5p5-1R1/19/5c5E1/16/19/5P5p5-1R1/19/5p5-1R1/19/5p5-1R1/19/5c5E1/16/19/5P5p5-1R1/19/5p5-1R1/19/5c5E1/16/19/5P5c5E1/16/19/5P5p5-1R1/19/5p5-1R1/19/5c5E1/16/19/5P5p5-1R1/19/5c5E1/16/19/5P5p5-1R1/19/5p5-1R1/19/5c5E1/16/19/5P5p5-1R1/19/5p5-1R1/19/5p5-1R1/19/5c5E1/16/19/5P5c5E1/16/19/5P5p5-1R1/19/5p5-1R1/19/5p5-1R1/19/5c5E1/16/19/5P5p5-1R1/19/5p5-1R1/19/5c5E1/16/19/5P5p5-1R1/19/5p5-1R1/19/5c5E1/16/19/5P5p5-1R1/19/5p5-1R1/19/5c5E1/16/19/5P5p5-1R1/19/5p5-1R1/19/5c5E1/16/19/5P5p5-1R1/19/5p5-1R1/19/5c5E1/16/19/5P5p5-1R1/19/5p5-1R1/19/5c5E1/16/19/5P5c5E1/16/19/5P5p5-1R1/19/5p5-1R1/19/5p5-1R1/19/5c5E1/16/19/5P5p5-1R1/19/5p5-1R1/19/5c5E1/16/19/5P5p5-1R1/19/5p5-1R1/19/5p5-1R1/19/5c5E1/16/19/5P5p5-1R1/19/5p5-1R1/19/5c5E1/16/19/5P5p5-1R1/19/5p5-1R1/19/5c5E1/16/19/5P5p5-1R1/19/5p5-1R1/19/5c5E1/16/19/5P5p5-1R1/19/5c5E1/16/19/5P5p5-1R1/19/5p5-1R1/19/5p5-1R1/19/5p5-6c3p3-5P5p5-1R1/19/5p5-1R1/19/5p5-1R1/19/5c5E1/16/19/5P5p5-1R1/19/5p5-1R1/19/5p5-1R1/19/5c5E1/16/19/5P5p5-1R1/19/5p5-1R1/19/5p5-1R1/19/5c5E1/16/19/5P5c5E1/16/19/5P5p5-1R1/19/5p5-1R1/19/5p5-1R1/19/5p5-1R1/19/5c5E1/16/19/5P5p5-1R1/19/5p5-1R1/19/5p5-1R1/19/5p5-1R1/19/5p5-1R1/19/5p5-1R1/19/5c5E1/16/19/5P5p5-1R1/19/5p5-1R1/19/5p5-3P5p5-1R1/19/5p5-1R1/19/5p5-1R1/19/5c5E1/16/19/5P5p5-1R1/19/5p5-1R1/19/5c5E1/16/19/5P5p5-1R1/19/5p5-1R1/19/5p5-1R1/19/5c5E1/16/19/5P5p5-1R1/19/5c5E1/16/19/5P5p5-1R1/19/5p5-1R1/19/5c5E1/16/19/5P5p5-1R1/19/5p5-1R1/19/5c5E1/16/19/5P5p5-1R1/19/5p5-1R1/19/5p5-1R1/19/5c5E1/16/19/5P5p5-1R1/19/5c5E1/16/19/5P5p5-1R1/19/5p5-1R1/19/5p5-1R1/19/5c5E1/16/19/5P5p5-1R1/19/5p5-1R1/19/5c5E1/16/19/5P5c5E1/16/19/5P5p5-1R1/19/5c5E1/16/19/5P5p5-1R1/19/5p5-1R1/19/5c5E1/16/19/5P5p5-1R1/19/5p5-1R1/19/5p5-1R1/19/5c5E1/16/19/5P5p5-1R1/19/5p5-1R1/19/5c5E1/16/19/5P5p5-1p6-1R1/19/5p5-1R1/19/5c5E1/16/19/5P5p5-1R1/19/5p5-1R1/19/5p5-1R1/19/5c5E1/16/19/5P5p5-1R1/19/5c5E1/16/19/5P5p5-1R1/19/5p5-1R1/19/5c5E1/16/19/5P5p5-1R1/19/5p5-1R1/19/5p5-1R1/19/5c5E1/16/19/5P5p5-1R1/19/5c5E1/16/19/5P5p5-1R1/19/5p5-1R1/19/5c5E1/16/19/5P5p5-1R1/19/5p5-1R1/19/5p5-1R1/19/5c5E1/16/19/5P5p5-1R1/19/5p5-1R1/19/5c5E1/16/19/5P5p5-1R1/19/5p5-1R1/19/5p5-1R1/19/5c5E1/16/19/5P5p5-1R1/19/5p5-1R1/19/5p5-1R1/19/5c5E1/16/19/5P5p5-1R1/19/5c5E1/16/19/5P5p5-1R1/19/5c5E1/16/19/5P5p5-1R1/19/5p5-1R1/19/5p5-1R1/19/5c5E1/16/19/5P5p5-1R1/19/5p5-1R1/19/5E1/16/19/5P5p5-1R1/19/5p5-1R1/19/5p5-1R1/19/5c5E1/16/19/5P5p5-1R1/19/5p5-1R1/19/5p5-1R1/19/5c5E1/16/19/5P5p5-1R1/19/5p5-1R1/19/5p5-1R1/19/5c5E1/16/19/5P5p5-1R1/19/5p5-1R1/19/5E1/16/19/5P5p5-1R1/19/5p5-1R1/19/5p5-1R1/19/5c5E1/16/19/5P5p5-1R1/19/5p5-1R1/19/5p5-1R1/19/5c5E1/16/19/5P5p5-1R1/19/5p5-1R1/19/5p5-1R1/19/5p5-1R1/19/5p5-1R1/19/5c5E1/16/19/5P5p5-1R1/19/5p5-1R1/19/5p5-1R1/19/5c5E1/16/19/5P5p5-1R1/19/5p5-1R1/19/5p5-1R1/19/5c5E1/16/19/5P5p5-1R1/19/5p5-1R1/19/5p5-1R1/19/5c5E1/16/19/5P5p5-1R1/19/5p5-1R1/19/5E1/16/19/5P5p5-1R1/19/5p5-1R1/19/5c5E1/16/19/5P5p5-1R1/19/5p5-1R1/19/5p5-1R1/19/5c5E1/16/19/5P5p5-1R1/19/5p5-1R1/19/5p5-1R1/19/5c5E1/16/19/5P5p5-1R1/19/5p5-1R1/19/5p5-1R1/19/5c5E1/16/19/5P5p5-1R1/19/5p5-1R1/19/5p5-1R1/19/5c5E1/16/19/5P5p5-1R1/19/5p5-1R1/19/5p5-1R1/19/5c5E1/16/19/5P5p5-1R1/19/5p5-1R1/19/5p5-1R1/19/5c5E1/16/19/5P5p5-1R1/19/5p5-1R1/19/5c5p5-1R1/19/5p5-1R1/19/5p5-1R1/19/5c5p5-1R1/19/5p5-1R1/19/5p5-1R1/19/5c5p5-1R1/19/5c5E1/16/19/5P5p5-1R1/19/5c5p5-1R1/19/5p5-1R1/19/5E1/16/19/5p2-5P5c5E1/16/19/5P5c5E1/16/19/5P5c5E1/16/19/5P5p5-1R1/19/5p5-1R1/19/5E1/16/19/5P5p5-1R1/19/5c5E1/16/19/5P5c5E1/16/19/5P5c5E1/16/19/5P5p5-1R1/19/5p5-1R1/19/5c5E1/16/19/5P5E1/16/19/5P5p5-1R1/19/5c5E1/16/19/5P5p5-1R1/19/5p5-1R1/19/5p5-1R1/19/5c5E1/16/19/5P5p5-1R1/19/5p5-1R1/19/5c5E1/16/19/5P5p5-1R1/19/5p5-1R1/19/5c5p5-1R1/19/5c5E1/16/19/5P5p5-1R1/19/5c5p5-1R1/19/5c5E1/16/19/5P5p5-1R1/19/5c5p5-1R1/19/5p5-1R1/19/5E1/16/19/5p2-5P5c5E1/16/19/5P5c5E1/16/19/5P5p5-1R1/19/5p5-1R1/19/5c5E1/16/19/5P5p5-1R1/19/5p5-1R1/19/5c5p5-1R1/19/5p5-1R1/19/5p5-1R1/19/5c5E1/16/19/5P5p5-1R1/19/5p5-1R1/19/5c5E1/16/19/5P5p5-1R1/19/5p5-1R1/19/5p5-1R1/19/5c5E1/16/19/5P5c5E1/16/19/5P5p5-1R1/19/5p5-1R1/19/5c5E1/16/19/5P5p5-1R1/19/5p5-1R1/19/5p5-1R1/19/5p5-1R1/19/5p5-1R1/19/5c5E1/16/19/5P5p5-1R1/19/5p5-1R1/19/5p5-1R1/19/5p5-1R1/19/5c5E1/16/19/5P5p5-1R1/19/5c5E1/16/19/5P5p5-1R1/19/5p5-6E1/16/19/5P5c5E1/16/19/5P5p5-1R1/19/5p5-1R1/19/5c5E1/16/19/5P5c5E1/16/19/5P5p5-1R1/19/5E1/16/19/5P5c5E1/16/19/5P5p5-1R1/19/5c5E1/16/19/5P5p5-1R1/19/5E1/16/19/5P5c5E1/16/19/5P5p5-1R1/19/5c5E1/16/19/5P5p5-1R1/19/5c5E1/16/19/5P5p5-1R1/19/5p5-1R1/19/5c5E1/16/19/5P5p5-1R1/19/5p5-1R1/19/5c5E1/16/19/5P5p5-1R1/19/5p5-1R1/19/5p5-1R1/19/5c5E1/16/19/5P5p5-1R1/19/5p5-1R1/19/5c5E1/16/19/5P5p5-1R1/19/5p5-1R1/19/5p5-1R1/19/5c5E1/16/19/5P5p5-1R1/19/5p5-1R1/19/5p5-1R1/19/5c5E1/16/19/5P5p5-1R1/19/5p5-1R1/19/5c5E1/16/19/5P5p5-1R1/19/5p5-1R1/19/5p5-1R1/19/5c5E1/16/19/5P5p5-1R1/19/5p5-1R1/19/5p5-1R1/19/5c5E1/16/19/5P5p5-1R1/19/5p5-1R1/19/5c5E1/16/19/5P5p5-1R1/19/5p5-1R1/19/5c5p5-1R1/19/5c5E1/16/19/5P5p5-1R1/19/5p5-1R1/19/5p5-1R1/19/5c5E1/16/19/5P5p5-1R1/19/5p5-1R1/19/5p5-6E1/16/19/5P5c5E1/16/19/5P5p5-1R1/19/5p5-1R1/19/5c5E1/16/19/5P5p5-1R1/19/5E1/16/19/5P5c5E1/16/19/5P5p5-1R1/19/5p5-1R1/19/5c5E1/16/19/5P5p5-1R1/19/5p5-1R1/19/5p5-1R1/19/5c5E1/16/19/5P5p5-1R1/19/5p5-1R1/19/5c5E1/16/19/5P5p5-1R1/19/5p5-1R1/19/5c5E1/16/19/5P5p5-1R1/19/5p5-1R1/19/5c5E1/16/19/5P5p5-1R1/19/5p5-1R1/19/5E1/16/19/5P5c5E1/16/19/5P5p5-1R1/19/5E1/16/19/5P5c5E1/16/19/5P5p5-1R1/19/5c5E1/16/19/5P5p5-1R1/19/5p5-1R1/19/5p5-6E1/16/19/5P5c5E1/16/19/5P5p5-1R1/19/5p5-1R1/19/5E1/16/19/5R1/19/5c5E1/16/19/5P5p5-1R1/19/5p5-1R1/19/5E1/16/19/5P5c5E1/16/19/5P5p5-1R1/19/5p5-1R1/19/5c5E1/16/19/5P5p5-1R1/19/5p5-1R1/19/5p5-1R1/19/5c5E1/16/19/5P5p5-1R1/19/5c5E1/16/19/5P5p5-1R1/19/5p5-1R1/19/5c5E1/16/19/5P5p5-1R1/19/5p5-1R1/19/5p5-1R1/19/5c5E1/16/19/5P5p5-1R1/19/5p5-1R1/19/5p5-1R1/19/5E1/16/19/5P5p5-1R1/19/5c5E1/16/19/5P5p5-1R1/19/5p5-1R1/19/5c5E1/16/19/5P5c5E1/16/19/5P5p5-1R1/19/5p5-1R1/19/5p5-1R1/19/5c5E1/16/19/5P5p5-1R1/19/5p1-5P5p5-1R1/19/5E1/16/19/5P5c5E1/16/19/5P5p5-1R1/19/5c5E1/16/19/5P5p5-1R1/19/5p5-1R1/19/5E1/16/19/5P5c5E1/16/19/5P5p5-1R1/19/5E1/16/19/5P5c5E1/16/19/5P5p5-1R1/19/5c5E1/16/19/5P5c5E1/16/19/5P5p5-1R1/19/5p5-1R1/19/5p5-6c5E1/16/19/5P5p5-1R1/19/5p5-1R1/19/5E1/16/19/5P5p5-1R1/19/5c5E1/16/19/5P5p5-1R1/19/5p5-1R1/19/5p5-1R1/19/5c5E1/16/19/5P5p5-1R1/19/5c5E1/16/19/5P5p5-1R1/19/5p5-1R1/19/5p5-1R1/19/5c5E1/16/19/5P5p5-1R1/19/5c5E1/16/19/5P5p5-1R1/19/5p5-1R1/19/5p5-1R1/19/5c5E1/16/19/5P5p5-1R1/19/5p5-1R1/19/5c5E1/16/19/5P5p5-1R1/19/5p5-1R1/19/5c5E1/16/19/5P5p5-1R1/19/5p5-1R1/19/5c5E1/16/19/5P5p5-1R1/19/5p5-1R1/19/5c5E1/16/19/5P5p5-1R1/19/5p5-1R1/19/5p5-1R1/19/5c5E1/16/19/5P5p5-1R1/19/5p5-1R1/19/5c5E1/16/19/5P5p5-1R1/19/5c5E1/16/19/5P5p5-1R1/19/5p5-1R1/19/5c5E1/16/19/5P5p5-1R1/19/5c5E1/16/19/5P5p5-1R1/19/5p5-1R1/19/5c5E1/16/19/5P5p5-1R1/19/5p5-6c5E1/16/19/5P5p5-1R1/19/5p5-1R1/19/5p5-1R1/19/5c5E1/16/19/5P5p5-1R1/19/5p5-1R1/19/5c5E1/16/19/5p4-5P5p5-1R1/19/5p5-1R1/19/5p5-6c5E1/16/19/5P5p5-1R1/19/5p5-1R1/19/5p5-1R1/19/5c5E1/16/19/5P5p5-1R1/19/5p5-1R1/19/5p5-1R1/19/5c5E1/16/19/5P5p5-1R1/19/5p5-1R1/19/5p5-1R1/19/5p5-1R1/19/5E1/16/19/5P5p1-5P5p5-1R1/19/5p5-1R1/19/5p5-1R1/19/5c5E1/16/19/5P5p5-1R1/19/5p5-1R1/19/5p5-1R1/19/5c5E1/16/19/5P5p5-1R1/19/5p5-1R1/19/5p5-1R1/19/5E1/16/19/5P5c5E1/16/19/5P5p5-1R1/19/5p5-1R1/19/5E1/16/19/5P5c5E1/16/19/5P5p5-1R1/19/5p5-1R1/19/5p5-6E1/16/19/5P5p5-1R1/19/5p5-1R1/19/5p5-1R1/19/5c5E1/16/19/5P5p5-1R1/19/5p5-1R1/19/5p5-1R1/19/5p5-1R1/19/5c5E1/16/19/5P5E1/16/19/5R1/19/5p5-1R1/19/5p5-1R1/19/5p5-1R1/19/5c5E1/16/19/5P5p5-1R1/19/5p5-1R1/19/5p5-1R1/19/5p5-1R1/19/5c5E1/16/19/5P5p5-1R1/19/5p5-1R1/19/5p5-1R1/19/5c5E1/16/19/5P5p5-1R1/19/5p5-1R1/19/5p5-1R1/19/5p5-1R1/19/5p5-1R1/19/5p5-1R1/19/5p5-1R1/19/5p5-1R1/19/5p5-1R1/19/5p5-1R1/19/5c5E1/16/19/5P5p5-1R1/19/5p5-1R1/19/5p5-1R1/19/5c5E1/16/19/5P5p5-1R1/19/5p5-1R1/19/5p5-1R1/19/5p5-1R1/19/5c5E1/16/19/5P5p5-1R1/19/5c5E1/16/19/5P5p5-1R1/19/5c5E1/16/19/5P5p5-1R1/19/5p5-1R1/19/5p5-1R1/19/5c5E1/16/19/5P5p5-1R1/19/5p5-1R1/19/5p5-1R1/19/5c5E1/16/19/5P5p5-1R1/19/5c5E1/16/19/5P5p5-1R1/19/5p5-1R1/19/5c5E1/16/19/5P5p5-1R1/19/5p5-1R1/19/5c5E1/16/19/5P5p5-1R1/19/5p5-1R1/19/5p5-1R1/19/5c5E1/16/19/5P5p5-1R1/19/5p5-6E1/16/19/5P5p5-1R1/19/5p5-1R1/19/5p5-1R1/19/5c5E1/16/19/5P5p5-1R1/19/5p5-1R1/19/5p5-1R1/19/5c5E1/16/19/5P5p5-1R1/19/5p5-1R1/19/5p5-1R1/19/5c5E1/16/19/5P5p5-1R1/19/5p5-1R1/19/5p5-1R1/19/5c5E1/16/19/5P5p5-1R1/19/5p5-1R1/19/5c5E1/16/19/5P5p5-1R1/19/5c5E1/16/19/5P5p5-1R1/19/5p5-1R1/19/5p5-1R1/19/5c5E1/16/19/5P5p5-1R1/19/5p5-1R1/19/5p5-1R1/19/5c5E1/16/19/5P5p5-1R1/19/5p5-1R1/19/5c5E1/16/19/5P5p5-1R1/19/5p5-1R1/19/5c5E1/16/19/5P5p5-1R1/19/5c5E1/16/19/5P5p5-1R1/19/5p5-1R1/19/5c5E1/16/19/5P5c5p5-1R1/19/5p5-1R1/19/5p5-1R1/19/5p5-1R1/19/5p5-1R1/19/5p5-1R1/19/5p5-1R1/19/5c5E1/16/19/5P5p5-1R1/19/5p5-1R1/19/5p5-1R1/19/5c5E1/16/19/5P5p5-1R1/19/5p5-1R1/19/5p5-1R1/19/5p5-1R1/19/5c5E1/16/19/5P5p5-1R1/19/5c5E1/16/19/5P5p5-1R1/19/5p5-1R1/19/5c5E1/16/19/5P5p5-1R1/19/5p5-1R1/19/5p5-1R1/19/5c5E1/16/19/5P5p5-1R1/19/5p5-1R1/19/5p5-1R1/19/5c5E1/16/19/5P5p5-1R1/19/5c5E1/16/19/5P5p5-1R1/19/5p5-1R1/19/5c5E1/16/19/5P5p5-1R1/19/5p5-1R1/19/5c5E1/16/19/5P5p5-1R1/19/5p5-1R1/19/5p5-1R1/19/5c5E1/16/19/5P5p5-1R1/19/5p5-6E1/16/19/5P5p5-1R1/19/5p5-1R1/19/5p5-1R1/19/5c5E1/16/19/5P5p5-1R1/19/5p5-1R1/19/5p5-1R1/19/5c5E1/16/19/5P5p5-1R1/19/5p5-1R1/19/5p5-1R1/19/5c5E1/16/19/5P5p5-1R1/19/5p5-1R1/19/5p5-1R1/19/5c5E1/16/19/5P5p5-1R1/19/5p5-1R1/19/5c5E1/16/19/5P5p5-1R1/19/5c5E1/16/19/5P5p5-1R1/19/5p5-1R1/19/5p5-1R1/19/5c5E1/16/19/5P5p5-1R1/19/5p5-1R1/19/5p5-1R1/19/5c5E1/16/19/5P5p5-1R1/19/5p5-1R1/19/5c5E1/16/19/5P5p5-1R1/19/5p5-1R1/19/5c5E1/16/19/5P5p5-1R1/19/5c5E1/16/19/5P5p5-1R1/19/5p5-1R1/19/5c5E1/16/19/5P5c5E1/16/19/5P5p5-1R1/19/5p5-1R1/19/5p5-1R1/19/5c5E1/16/19/5P5p5-1R1/19/5p5-1R1/19/5c5E1/16/19/5P5p5-1R1/19/5p5-1R1/19/5p5-1R1/19/5c5E1/16/19/5P5c5E1/16/19/5P5p5-1R1/19/5p5-1R1/19/5p5-1R1/19/5E1/16/19/5P5p5-1R1/19/5c5E1/16/19/5P5p5-1R1/19/5p5-1R1/19/5p5-1R1/19/5c5E1/16/19/5P5c5E1/16/19/5P5p5-1R1/19/5p5-1R1/19/5p5-1R1/19/5c5E1/16/19/5P5p5-1R1/19/5c5E1/16/19/5P5p5-1R1/19/5c5E1/16/19/5P5c5E1/16/19/5P5p5-1R1/19/5p5-1R1/19/5p5-1R1/19/5c5E1/16/19/5P5p5-1R1/19/5p5-1R1/19/5p5-3R1/19/5p5-1R1/19/5c5E1/16/19/5P5c5E1/16/19/5P5p5-1R1/19/5p5-1R1/19/5c5E1/16/19/5P5p5-1R1/19/5p5-1R1/19/5c5E1/16/19/5P5p5-1R1/19/5p5-1R1/19/5p5-1R1/19/5c5E1/16/19/5P5E1/16/19/5R1/19/5p5-1R1/19/5p5-1R1/19/5c5E1/16/19/5P5p5-1R1/19/5p5-1R1/19/5p5-1R1/19/5p5-1R1/19/5E1/16/19/5P5c5E1/16/19/5P5p5-1R1/19/5p5-1R1/19/5p5-1R1/19/5p5-1R1/19/5c5E1/16/19/5P5p5-1R1/19/5p5-1R1/19/5p5-1R1/19/5E1/16/19/5P5c52E1/16/19/5P5p5-1R1/19/5c5E1/16/19/5P5A1/16/19/5R1/19/5p5-1R1/19/5p5-6p3-5P5c5E1/16/19/5P5A1/16/19/5R1/19/5p5-1R1/19/5p5-6E1/16/19/5P5c5E1/16/19/5P5p5-1R1/19/5p5-1R1/19/5E1/16/19/5P5c5E1/16/19/5P5p5-1R1/19/5p5-1R1/19/5c5E1/16/19/5P5p5-1R1/19/5p5-1R1/19/5p5-1R1/19/5c5E1/16/19/5P5p5-1R1/19/5c5E1/16/19/5P5p5-1R1/19/5p5-1R1/19/5p5-1R1/19/5c5E1/16/19/5P5p5-1R1/19/5c5E1/16/19/5P5p5-1R1/19/5c5E1/16/19/5P5p5-1R1/19/5p5-1R1/19/5c5E1/16/19/5P5p5-1R1/19/5p5-1R1/19/5c5E1/16/19/5P5c5E1/16/19/5P5p5-1R1/19/5p5-1R1/19/5p5-1R1/19/5c5E1/16/19/5P5p5-1R1/19/5c5E1/16/19/5P5p5-1R1/19/5p5-1R1/19/5c5E1/16/19/5P5c5E1/16/19/5P5p5-1R1/19/5p5-1R1/19/5p5-1R1/19/5c5E1/16/19/5P5p5-1R1/19/5c5E1/16/19/5P5c5E1/16/19/5P5c5E1/16/19/5P5p5-1R1/19/5p5-1R1/19/5p5-1R1/19/5c5E1/16/19/5P5c5E1/16/19/5P5p5-1R1/19/5p5-1R1/19/5p5-1R1/19/5c5E1/16/19/5P5p5-1R1/19/5p5-1R1/19/5c5E1/16/19/5P5p5-1R1/19/5p5-1R1/19/5c5E1/16/19/5P5p5-1R1/19/5p5-1R1/19/5c5E1/16/19/5P5p5-1R1/19/5p5-1R1/19/5p5-1R1/19/5c5E1/16/19/5P5E1/16/19/5R1/19/5p5-1R1/19/5p5-1R1/19/5c5E1/16/19/5P5p5-1R1/19/5p5-1R1/19/5p5-1R1/19/5p5-1R1/19/5E1/16/19/5P5c5E1/16/19/5P5p5-1R1/19/5p5-1R1/19/5p5-1R1/19/5p5-1R1/19/5p5-1R1/19/5E1/16/19/5P5c5E1/16/19/5P5p5-1R1/19/5p5-1R1/19/5p5-1R1/19/5p5-1R1/19/5c5E1/16/19/5P5p5-1R1/19/5p5-1R1/19/5p5-1R1/19/5E1/16/19/5P5c52E1/16/19/5P5p5-1R1/19/5c5E1/16/19/5P5A1/16/19/5R1/19/5p5-1R1/19/5p5-6p3-5P5c5E1/16/19/5P5A1/16/19/5R1/19/5p5-1R1/19/5p5-6E1/16/19/5P5c5E1/16/19/5P5p5-1R1/19/5p5-1R1/19/5E1/16/19/5P5c5E1/16/19/5P5p5-1R1/19/5p5-1R1/19/5c5E1/16/19/5P5p5-1R1/19/5p5-1R1/19/5p5-1R1/19/5c5E1/16/19/5P5p5-1R1/19/5c5E1/16/19/5P5p5-1R1/19/5c5E1/16/19/5P5p5-1R1/19/5p5-1R1/19/5c5E1/16/19/5P5p5-1R1/19/5c5E1/16/19/5P5p5-1R1/19/5c5E1/16/19/5P5p5-1R1/19/5p5-1R1/19/5c5E1/16/19/5P5p5-1R1/19/5c5E1/16/19/5P5p5-1R1/19/5p5-1R1/19/5c5E1/16/19/5P5p5-1R1/19/5c5E1/16/19/5P5p5-1R1/19/5p5-1R1/19/5c5E1/16/19/5P5p5-1R1/19/5p5-1R1/19/5E1/16/19/5P5p5-1R1/19/5p5-1R1/19/5p5-1R1/19/5c5p5-1R1/19/5p5-1R1/19/5c52E1/16/19/5P5p5-1R1/19/5p5-1R1/19/5E1/16/19/5P5p5-1R1/19/5p5-1R1/19/5p5-1R1/19/5c5E1/16/19/5P5p5-1R1/19/5c5E1/16/19/5P5p5-1R1/19/5p5-1R1/19/5c5E1/16/19/5P5p5-1R1/19/5c5E1/16/19/5P5p5-1R1/19/5p5-1R1/19/5p5-1R1/19/5c5E1/16/19/5P5p5-1R1/19/5p5-1R1/19/5c5E1/16/19/5P5p5-1R1/19/5p5-1R1/19/5p5-6p5-1R1/19/5p5-1R1/19/5p5-1R1/19/5E1/16/19/5P5c5E1/16/19/5P5p5-1R1/19/5p5-1R1/19/5p5-6E1/16/19/5P5p5-1R1/19/5p5-1R1/19/5E1/16/19/5P5c5E1/16/19/5P5p5-1R1/19/5E1/16/19/5P5c5E1/16/19/5P5p5-1R1/19/5p5-1R1/19/5c5E1/16/19/5P5p5-1R1/19/5p5-1R1/19/5c5E1/16/19/5P5p5-1R1/19/5p5-1R1/19/5c5E1/16/19/5P5p5-1R1/19/5p5-1R1/19/5p5-1R1/19/5c5E1/16/19/5P5p5-1R1/19/5p5-1R1/19/5p5-1R1/19/5c5E1/16/19/5P5p5-1R1/19/5p5-1R1/19/5c5E1/16/19/5P5p5-1R1/19/5p5-1R1/19/5p5-1R1/19/5c5E1/16/19/5P5p5-1R1/19/5p5-1R1/19/5c5E1/16/19/5P5p5-1R1/19/5p5-1R1/19/5p5-1R1/19/5c5E1/16/19/5P5p5-1R1/19/5p5-1R1/19/5p5-1R1/19/5c5E1/16/19/5P5p5-1R1/19/5p5-1R1/19/5c5p5-1R1/19/5c5E1/16/19/5P5p5-1R1/19/5p5-1R1/19/5c5E1/16/19/5P5p5-1R1/19/5c5E1/16/19/5P5p5-1R1/19/5p5-1R1/19/5p5-1R1/19/5c5E1/16/19/5P5p5-1R1/19/5p6-1R1/19/5c5E1/16/19/5P5p5-1R1/19/5p5-1R1/19/5c5E1/16/19/5P5p5-1R1/19/5p5-1R1/19/5c5E1/16/19/5P5p5-1R1/19/5p5-1R1/19/5c5E1/16/19/5P5p5-1R1/19/5p5-1R1/19/5p5-1R1/19/5c5E1/16/19/5P5p5-1R1/19/5p5-1R1/19/5c5E1/16/19/5P5p5-1R1/19/5p5-1R1/19/5p5-1R1/19/5E1/16/19/5P5p5-1R1/19/5c5E1/16/19/5P5p5-1R1/19/5p5-1R1/19/5c5E1/16/19/5P5p5-1R1/19/5p5-1R1/19/5p5-1R1/19/5E1/16/19/5P5p5-1R1/19/5c5E1/16/19/5P5p5-1R1/19/5p5-1R1/19/5p5-1R1/19/5p5-1R1/19/5E1/16/19/5P5p5-1R1/19/5c5E1/16/19/5P5p5-1R1/19/5p5-1R1/19/5c5E1/16/19/5P5p5-1R1/19/5p5-1R1/19/5p5-1R1/19/5E1/16/19/5P5c5E1/16/19/5P5p5-1R1/19/5c5E1/16/19/5P5p5-1R1/19/5p5-1R1/19/5c5E1/16/19/5P5p5-1R1/19/5p5-1R1/19/5c5E1/16/19/5P5p5-1R1/19/5c5E1/16/19/5P5p5-1R1/19/5p5-1R1/19/5p5-1R1/19/5c5E1/16/19/5P5c5E1/16/19/5P5p5-1R1/19/5p5-1R1/19/5p5-1R1/19/5c5E1/16/19/5P5p5-1R1/19/5p5-1R1/19/5c5E1/16/19/5P5p5-1R1/19/5p5-1R1/19/5p5-1R1/19/5c5E1/16/19/5P5p5-1R1/19/5c5E1/16/19/5P5p5-1R1/19/5p5-1R1/19/5p5-1R1/19/5c5E1/16/19/5P5p5-1R1/19/5c5E1/16/19/5P5p5-1R1/19/5c5p5-1R1/19/5p5-1R1/19/5p5-1R1/19/5c5E1/16/19/5P5p5-1R1/19/5p5-1R1/19/5p5-6E1/16/19/5P5c5E1/16/19/5P5p5-1R1/19/5p5-1R1/19/5p5-1R1/19/5c5E1/16/19/5P5p5-1R1/19/5p5-1R1/19/5c5E1/16/19/5P5p5-1R1/19/5p5-1R1/19/5p5-1R1/19/5c5E1/16/19/5P5p5-1R1/19/5p5-1R1/19/5c5E1/16/19/5P5p5-1R1/19/5p5-1R1/19/5p5-1R1/19/5p5-1R1/19/5E1/16/19/5P5c5A1/16/19/5R1/19/5p5-1R1/19/5c5p5-1R1/19/5p5-1R1/19/5p5-1R1/19/5c5E1/16/19/5P5p5-1R1/19/5p5-1R1/19/5p5-6E1/16/19/5P5c5E1/16/19/5P5p5-1R1/19/5p5-1R1/19/5p5-1R1/19/5c5E1/16/19/5P5p5-1R1/19/5p5-1R1/19/5p5-1R1/19/5c5p5-1R1/19/5p5-1R1/19/5c5p5-1R1/19/5p5-1R1/19/5c5p5-1R1/19/5c5p5-1R1/19/5p5-1R1/19/5c5p5-1R1/19/5p5-1R1/19/5c5p5-1R1/19/5p5-1R1/19/5c5p5-1R1/19/5p5-1R1/19/5c5p5-1R1/19/5p5-1R1/19/5c5p5-1R1/19/5p5-1R1/19/5c5p5-1R1/19/5p5-1R1/19/5c5p5-1R1/19/5p5-1R1/19/5c5p5-1R1/19/5p5-1R1/19/5c5E1/16/19/5p5-1R1/19/5p5-1R1/19/5p5-1R1/19/5p5-1R1/19/5p5-1R1/19/5E1/16/19/5P5c5A1/16/19/5R1/19/5p5-1R1/19/5c5E1/16/19/5P5p5-1R1/19/5p5-1R1/19/5c5E1/16/19/5P5p5-1R1/19/5p5-1R1/19/5E1/16/19/5p2-5P5c5E1/16/19/5P5p5-1R1/19/5p5-1R1/19/5c5E1/16/19/5P5p5-1R1/19/5p5-1R1/19/5c5E1/16/19/5P5p5-1R1/19/5p5-1R1/19/5c5E1/16/19/5P5p5-1R1/19/5c5E1/16/19/5p5-1R1/19/5p5-1R1/19/5p5-1R1/19/5p5-1R1/19/5p5-1R1/19/5E1/16/19/5P5c5A1/16/19/5R1/19/5p5-1R1/19/5c5E1/16/19/5P5p5-1R1/19/5p5-1R1/19/5c5E1/16/19/5P5p5-1R1/19/5p5-1R1/19/5c5E1/16/19/5P5p5-1R1/19/5p5-1R1/19/5c5E1/16/19/5P5p5-1R1/19/5p5-1R1/19/5c5E1/16/19/5P5p5-1R1/19/5p5-1R1/19/5p5-1R1/19/5c5E1/16/19/5P5p5-1R1/19/5p5-1R1/19/5c5E1/16/19/5P5p5-1R1/19/5p5-1R1/19/5p5-1R1/19/5c5E1/16/19/5P5p5-1R1/19/5p5-1R1/19/5c5E1/16/19/5P5p5-1R1/19/5p5-1R1/19/5p5-1R1/19/5c5E1/16/19/5P5p5-1R1/19/5p5-1R1/19/5c5E1/16/19/5P5p5-1R1/19/5p5-1R1/19/5p5-1R1/19/5c5E1/16/19/5P5p5-1R1/19/5p5-1R1/19/5p5-1R1/19/5c5E1/16/19/5P5p5-1R1/19/5p5-1R1/19/5p5-1R1/19/5c5E1/16/19/5P5p5-1R1/19/5p5-1R1/19/5p5-1R1/19/5c5E1/16/19/5P5p5-1R1/19/5p5-1R1/19/5p5-1R1/19/5c5E1/16/19/5P5p5-1R1/19/5p5-1R1/19/5p5-1R1/19/5c5E1/16/19/5P5p5-1R1/19/5p5-1R1/19/5c5E1/16/19/5P5p5-3P5p5-1R1/19/5p5-1R1/19/5A1/16/19/5R1/19/5c5E1/16/19/5P5p5-1R1/19/5p5-1R1/19/5p5-3P5p5-1R1/19/5p5-1R1/19/5A1/16/19/5R1/19/5p5-1R1/19/5p5-3P5p5-1R1/19/5p5-1R1/19/5p5-1R1/19/5c5E1/16/19/5P5p5-1R1/19/5c5E1/16/19/5P5p5-1R1/19/5c5p5-1R1/19/5c5E1/16/19/5P5p5-6c53p5-1R1/19/5c5E1/16/19/5P5p5-6c5p5-1R1/19/5c52p5-1R1/19/5c5E1/16/19/5P5p5-1R1/19/5c52E1/16/19/5P5p5-1R1/19/5c5p5-1R1/19/5p5-1R1/19/5c5p5-1p6-1R1/19/5p5-1R1/19/5p5-1R1/19/5c5p5-1p6-1R1/19/5p5-1R1/19/5p5-1R1/19/5p5-1R1/19/5c5p5-1p6-1R1/19/5p5-1R1/19/5p5-1R1/19/5c5p5-1p6-1R1/19/5p5-1R1/19/5p5-1R1/19/5c5E1/16/19/5P5c5E1/16/19/5P5p5-1R1/19/5p5-1R1/19/5p5-1R1/19/5c5E1/16/19/5P5p5-1R1/19/5p5-1R1/19/5c5p5-1R1/19/5c5E1/16/19/5P5p5-1R1/19/5p5-1R1/19/5p5-1R1/19/5c5E1/16/19/5P5p5-1R1/19/5c5p5-1R1/19/5c5E1/16/19/5P5p5-6c5p5-1R1/19/5c5E1/16/19/5P5c5E1/16/19/5P5p5-6c5p5-1R1/19/5c5E1/16/19/5P5c5E1/16/19/5P5p5-6c5E1/16/19/5P5p5-6c5p5-1R1/19/5c5E1/16/19/5P5c5p5-1R1/19/5c5E1/16/19/5P5c5E1/16/19/5P5p5-6c5p5-1R1/19/5c5E1/16/19/5P5c5E1/16/19/5P5p5-1R1/19/5c5E1/16/19/5P5p5-1R1/19/5c5p5-1R1/19/5p5-3P5c5E1/16/19/5P5c5E1/16/19/5P5p5-6c5p5-1R1/19/5c5E1/16/19/5P5c5E1/16/19/5P5p5-1R1/19/5c5E1/16/19/5P5p5-1R1/19/5c52p5-1R1/19/5c5p5-1R1/19/5p5-1R1/19/5c5E1/16/19/5P5p5-1R1/19/5p5-1R1/19/5p5-1R1/19/5c5E1/16/19/5P5p5-1R1/19/5c5p5-1R1/19/5p5-1R1/19/5c5E1/16/19/5P5p5-1R1/19/5p5-1R1/19/5p5-1R1/19/5c5E1/16/19/5P5p5-1R1/19/5p5-1R1/19/5p5-1R1/19/5c5E1/16/19/5P5p5-1R1/19/5p5-1R1/19/5c5p5-1R1/19/5c5E1/16/19/5P5p5-1R1/19/5c5p5-1R1/19/5c5E1/16/19/5P5p5-1R1/19/5c5E1/16/19/5P5p5-1R1/19/5E1/16/19/52P5c5E1/16/19/5P5p5-1R1/19/5c5E1/16/19/5P5c5E1/16/19/5P5p5-1R1/19/5c5E1/16/19/5P5p5-1R1/19/5E1/16/19/52P5c5E1/16/19/5P5p5-1R1/19/5c5E1/16/19/5P5p5-1R1/19/5p5-1R1/19/5p5-1R1/19/5c5p5-1R1/19/5c5E1/16/19/5P5p5-1R1/19/5c5p5-1R1/19/5c5E1/16/19/5P5p5-1R1/19/5c5E1/16/19/5P5p5-1R1/19/5E1/16/19/52P5c5E1/16/19/5P5p5-1R1/19/5c5E1/16/19/5P5E1/16/19/5P5p5-1R1/19/5c5E1/16/19/5P5c5E1/16/19/5P5E1/16/19/5P5p5-2A1/16/19/5P5p5-1R1/19/5c5E1/16/19/5P5p5-1R1/19/5E1/16/19/52P5c5E1/16/19/5P5p5-1R1/19/5c5E1/16/19/5P5E1/16/19/5P5p5-1R1/19/5c5E1/16/19/5P5c5E1/16/19/5P5E1/16/19/5P5p5-2A1/16/19/5P5c5E1/16/19/5P5p5-1R1/19/5p5-1R1/19/5c5E1/16/19/5P5p5-2A1/16/19/5R1/19/5c5E1/16/19/5P5c5E1/16/19/5P5c5E1/16/19/5P5p5-1R1/19/5c5E1/16/19/5P5E1/16/19/5P5p5-1R1/19/5c5E1/16/19/5P5p5-1R1/19/5c5E1/16/19/5P5p5-1R1/19/5c5E1/16/19/5P5E1/16/19/5P5p5-1R1/19/5c5E1/16/19/5P5p5-1R1/19/5p5-1R1/19/5c52E1/16/19/5P5p5-1R1/19/5c5E1/16/19/5P5c5E1/16/19/5P5p5-1R1/19/5c5E1/16/19/5P5p5-1R1/19/5c5E1/16/19/5P5E1/16/19/5P5c5E1/16/19/5P5c5E1/16/19/5P5c5E1/16/19/5P5p5-1R1/19/5c5E1/16/19/5P5E1/16/19/5P5p5-1R1/19/5c5E1/16/19/5P5p5-1R1/19/5c5E1/16/19/5P5p5-1R1/19/5c5E1/16/19/5P5E1/16/19/5P5p5-1R1/19/5c5E1/16/19/5P5p5-1R1/19/5p5-1R1/19/5c52E1/16/19/5P5p5-1R1/19/5c5E1/16/19/5P5c5E1/16/19/5P5p5-1R1/19/5c5E1/16/19/5P5p5-1R1/19/5c5E1/16/19/5P5E1/16/19/5P5c5E1/16/19/5P5p5-1R1/19/5c5E1/16/19/5P5E1/16/19/5p5-1R1/19/5c5E1/16/19/5P5c5E1/16/19/5P5c5E1/16/19/5P5E1/16/19/5P5p5-1R1/19/5p5-1R1/19/5c5E1/16/19/5P5E1/16/19/5P5p1-5P5p5-1R1/19/5E1/16/19/5P5c5E1/16/19/5P5p5-1R1/19/5c5E1/16/19/5P5c5E1/16/19/5P5c5E1/16/19/5P5p5-1R1/19/5p1-5P5c52E1/16/19/5P5c5p5-1R1/19/5c5E1/16/19/5P5E1/16/19/5R1/19/5c5E1/16/19/5P5p5-1R1/19/5c5E1/16/19/5P5c5p1-5P5p5-1R1/19/5c5E1/16/19/5P5p5-1R1/19/5c52p1-5P5p5-1R1/19/5c5E1/16/19/5P5E1/16/19/5P5p5-1R1/19/5c5E1/16/19/5P5p5-1R1/19/5p5-1R1/19/5c5E1/16/19/5P5c5E1/16/19/5P5p5-1R1/19/5c5p5-1R1/19/5c5E1/16/19/5P5p5-1R1/19/5c5E1/16/19/5P5p5-1R1/19/5c5E1/16/19/5P5p5-1R1/19/5c5E1/16/19/5P5p5-1R1/19/5c5E1/16/19/5P5p5-1R1/19/5c5E1/16/19/5P5c5E1/16/19/5P5c5E1/16/19/5P5p5-1R1/19/5c5E1/16/19/5P5p5-1R1/19/5c5E1/16/19/5P5c5E1/16/19/5P5p5-1R1/19/5c5E1/16/19/5P5c5E1/16/19/5P5c5E1/16/19/5P5p5-1R1/19/5c52E1/16/19/5P5c5E1/16/19/5P5c5E1/16/19/5P5p5-1R1/19/5c5E1/16/19/5P5c5E1/16/19/5P5c5E1/16/19/5P5p5-1R1/19/5c5E1/16/19/5P5p5-1R1/19/5c5E1/16/19/5P5c5E1/16/19/5P5c5E1/16/19/5P5p5-1R1/19/5c5E1/16/19/5P5c5E1/16/19/5P5c5E1/16/19/5P5c5E1/16/19/5P5p5-1R1/19/5c5E1/16/19/5P5p5-6p3-5P5c5E1/16/19/5P5c5E1/16/19/5P5c5E1/16/19/5P5c5E1/16/19/5P5p5-1R1/19/5p5-1R1/19/5c5E1/16/19/5P5p5-1R1/19/5p5-3P5p5-1R1/19/5p5-1R1/19/5c5E1/16/19/5P5p5-1R1/19/5p5-3P5p5-6p5-1R1/19/5p5-1R1/19/5c5E1/16/19/5P5p5-1R1/19/5c5E1/16/19/5P5p5-1R1/19/5c5E1/16/19/5P5p5-1R1/19/5c5E1/16/19/5P5p5-1R1/19/5c5E1/16/19/5P5p5-1R1/19/5c5E1/16/19/5P5p5-1R1/19/5c5E1/16/19/5P5p5-1R1/19/5p5-1R1/19/5p5-6p3-5P5c5E1/16/19/5P5p5-1R1/19/5p5-1R1/19/5c5E1/16/19/5P5p5-1R1/19/5c5E1/16/19/5P5p5-1R1/19/5c5E1/16/19/5P5p5-1R1/19/5c5E1/16/19/5P5p5-1R1/19/5c5E1/16/19/5P5p5-1R1/19/5p5-1R1/19/5c5E1/16/19/5P5p5-1R1/19/5c5E1/16/19/5P5p5-1R1/19/5c5E1/16/19/5P5p5-1R1/19/5c5E1/16/19/5P5p5-1R1/19/5c5E1/16/19/5P5p5-1R1/19/5c5E1/16/19/5P5p5-1R1/19/5p5-1R1/19/5c5E1/16/19/5P5p5-1R1/19/5p5-1R1/19/5c5E1/16/19/5P5p5-1R1/19/5p5-1A1/16/19/5R1/19/5c5E1/16/19/5P5p5-1R1/19/5p5-1R1/19/5c5E1/16/19/5P5p5-1R1/19/5E1/16/19/5P5p5-1R1/19/5c5E1/16/19/5P5p5-1R1/19/5E1/16/19/5P5c5E1/16/19/5P5p5-1R1/19/5E1/16/19/5P5p5-1R1/19/5c5E1/16/19/5P5p5-1R1/19/5p5-1R1/19/5c5E1/16/19/5P5p5-1R1/19/5E1/16/19/5P5c5E1/16/19/5P5p5-1R1/19/5E1/16/19/5P5p5-1R1/19/5c5E1/16/19/5P5p5-1R1/19/5p5-1R1/19/5c5E1/16/19/5P5p5-1R1/19/5E1/16/19/5P5p5-1R1/19/5c5E1/16/19/5P5p5-1R1/19/5p5-1R1/19/5c5E1/16/19/5P5p5-1R1/19/5E1/16/19/5P5p5-1R1/19/5c5E1/16/19/5P5E1/16/19/52P5p5-1R1/19/5p5-1R1/19/5c5E1/16/19/5P5E1/16/19/52P5p5-1R1/19/5c5E1/16/19/5P5p5-1R1/19/5E1/16/19/5P5E1/16/19/5R1/19/5c5E1/16/19/5P5p5-1R1/19/5E1/16/19/5P5c5E1/16/19/5P5p5-1R1/19/5E1/16/19/5P5p5-1R1/19/5E1/16/19/5P5p5-1R1/19/5c5A1/16/19/5R1/19/5E1/16/19/5P5E1/16/19/5p4-1R1/19/5E1/16/19/5P5p5-2E1/16/19/5P5E1/16/19/5P5E1/16/19/5P5A1/16/19/5R1/19/5E1/16/19/5P5E1/16/19/5p4-1R1/19/5E1/16/19/5P5p5-2E1/16/19/5P5E1/16/19/5P5E1/16/19/5P5A1/16/19/5R1/19/5c5E1/16/19/5P5p5-3A1/16/19/5R1/19/5p5-1R1/19/5p5-1R1/19/5c5E1/16/19/5P5A1/16/19/5R1/19/5p5-1R1/19/5p5-1R1/19/5p5-1R1/19/5p5-1R1/19/5p5-1R1/19/5c5p5-3A1/16/19/5R1/19/5p5-1R1/19/5p5-6C52E1/16/19/5C5E1/16/19/5P5A1/16/19/5p3-5P5E1/16/19/5P5E1/16/19/5p2-3C5E1/16/19/5C5E1/16/19/5P52B5E1/16/19/5p1-3

### cen6

D6F6K6p11-12c167c1721Q6c116p1-9p5-11c143p14-11c152p15-11c15p15-11p14-112c146p14-9p5-11c144p14-11p13-11p14-112c148p14-113c1444p14-12p17-12c17p17-12c1715p17-12p16-12c162p16-122c16p16-122c16p16-12c1611p16-14c186p18-12c1620p16-12c17p17-12c17p17-12c17p17-12c16p16-122p17-12c163p16-12c16p16-12p17-122p15-12c163p16-122p17-12c162p16-12c163p16-12c173p17-12c16p16-12c163p16-17p11-12p16-12c165p16-12c1612p16-12c162p16-12c1612p16-14p18-12p16-12c17p17-12p16-12c172p17-12p16-12p17-12c17p17-12c17p17-12p16-12c16p16-123c162p16-124p17-12p16-123c16p16-123c162p16-12p16-7p15-12c16p16-122p17-12c16p16-122p17-122p16-12c17p17-122p16-12c17p17-12p16-12c17p17-12c162p16-122p17-12p16-13c173p17-12p16-12c16p16-122c163p16-122c162p16-122c16p16-12c162p16-12c162p16-12c162p16-12c162p16-12p17-12p16-122c164p16-123c162p16-122c16p16-12c16p16-12c162p16-12c16p16-122c16p16-122c16p16-12c16p16-12c16p16-122c16p16-12c162p16-12c16p16-12c1622p16-122p17-122p16-12p17-122p16-124c17p17-12p16-12p17-122c172p17-12p16-12p17-12c17p17-12p16-12c16p16-123c162p16-126p17-12p16-123c16p16-123c164p16-12c17p17-12c162p16-122p16-13c173p17-12p16-12c16p16-12c162p16-12c162p16-122c162p16-12c163p16-123c16p16-122c16p16-12c16p16-12c162p16-12c16p16-122c16p16-12c16p16-123c16p16-12c16p16-12c16p16-12c16p16-12c16p16-12c16p16-12c166p16-122c16p16-12c16p16-12c17p17-12c177p17-12p16-122c16p16-124c163p16-12c164p16-12c164p16-12c16p16-12c1619p16-12c16p16-12c164p16-12c162p16-12c165p16-12c166p16-122c16p16-12c175p17-12c16p16-12c1623p16-12c16p16-12c164p16-12c16p16-12c162p16-12c16p16-12c168p16-12c16p16-12c164p16-12c162p16-12c165p16-12c166p16-12c16p16-12c165p16-12c16p16-12c1624p16-12c16p16-12c164p16-12c16p16-12c163p16-12c16p16-12c162p16-12c16p16-12c16p16-12c164p16-14c182p18-12c16p16-12c162p16-122c163p16-12c1623p16-12c166p16-12c16p16-12c166p16-12c16p16-12c173p17-12c163p16-12p17-12c16p16-12c16p16-12c173p17-12c16p16-12c16p16-14c18p18-12p16-123c164p16-12c16p16-12c166p16-12c163p16-12c163p16-122p16-17c1515p15-12c16p16-12c16p16-10L6c162p16-12c165p16-12c16p16-12c162p16-10L6c168p16-124c164p16-122c165p16-124c16p16-12c163p16-124c16p16-12c162p16-12c16p16-12c17p17-15

### cen7

A7p2-3E7A7p3-5E72F7A7p5-6p2-3c3C7c5p5-3C7p5-6p2-3p3-6A7C7F7p2-3C7A7C7p5-6p2-3c3C7c32C7c36C7c33C7c3C7c3C7p3-1c33C7c32C7c32C72A7C7p5-6p2-3c3C7c3C7c3C7c3C7c3p3-6p2-3c3C7c32C7c33C7c3C7c33C7c3C7c33C7c33C7c3C7c314C7c63p6-3c63p6-3c6p6-4c164A7c459c64p6-3c63p6-3c610p6-3c66p6-3c69p6-3p6-1c44c68p6-3p6-1c44c63p6-3c65p6-3c66p6-3c629p6-3c64p6-3c62p6-3c618p6-3c64F7c3181p3-1c42p4-1c458p4-1c42p4-1c440p4-2c59p5-1c62p6-1c42p4-1c47p4-1c425p4-1c65p6-1c64p6-1c625p6-1c4p4-1c442p4-1c428p4-1c68p6-1c6103p6-1c44p4-1c436p4-2c54p5-2c56p5-2c54p5-2c57p5-2c53p5-2c59p5-2c56p5-2c58p5-2c5271p5-3c26p2-3c55p5-3c24p2-3c58p5-3c24p2-3c55p5-3c24p2-3c5157E7c2p2-4p3-5c22p2-5c24p2-5c24p2-5c24p2-5c24p2-5c24p2-5c26p2-5c26p2-5c215p2-5c23p2-5p2-4p3-5c24p2-5c23p2-5p2-4p3-5c214p2-5c25p2-5c211p2-5c211p2-5c24p2-5p2-4p3-5c218p2-5c211p2-5c211p2-5c226c44p4-1c4p4-1c417c24p2-3c28p2-3c211p2-3c223p2-3c263c427p4-1c424p4-2c518p5-2c56p5-2c55p5-2c5p5-2c543c39p3-4c3c55p5-2c53p5-2c510p5-2c518p5-2c514p5-2c539c3c55p5-2c58p5-2c52p5-2c54p5-2c55p5-2c52p5-2c52p5-2c52p5-2c55p5-2c520p5-1c414p4-2c57p5-2c523p5-2c520p5-2c582p5-1c14A7c1244A7c4242p4-1c4117p4-1c1153p1-5c257p2-4c25p2-3c2p2-4c2p2-4c2p2-42c2p2-3c2p2-4c2p2-3p2-4c2p2-4c2p3-4c25p2-6B7c42p4-6c22p2-6c2p2-4c22p2-4c22p2-4c2p2-4c2p3-4c33p3-4c2p2-4p2-3c3p3-4B7c2p2-4c22p3-1c32p3-4p2-4c23p2-4c2p3-4p2-4c23p2-4c2p2-3p5-1D7c22p2-42c2B7p5-2p2-4c22p2-43c23p2-42c2p2-3c5p2-4p3-4c22B7p2-4c2p2-42c23p2-4c34p3-4p2-4c24p2-3B7c5p2-3c23p2-4p2-3c66p6-4p2-3p6-2c52c22p2-4c2p2-42c2p2-5c2p2-3c2p2-4B7c53c2p2-4c2p2-4c22p2-4c2p2-4p2-5c22D7c2p2-4c22p2-4c22p2-3p3-1C7c5p3-1C7p5-2c2p2-3p3-4F7p2-3p5-1C7

### cen8

c417D8c52p5-1c110p1-4p5-3c5p5-1c116p1-7p1-3L8c8c1p1-3L8p8-3L8c8p1-3L8c8p1-7p1-3L8c8p1-7p1-3L8c8p1-3L8c8p1-7p1-3L8c8p1-7p1-3L8p8-3L8c8p1-7p1-3L8p8-3L8c8p1-3L8p8-3L8c87p1-3L8c8p8-3L8c8p1-3L8c8p1-3L8c8p1-72p1-3L8c8p1-7p1-3L8p8-3L8c8p8-3L8c8p1-3L8c8p1-3L8c8p1-3L8p8-3L8c83p1-72p1-3L8c8p1-3L8c83p1-3L8c84p1-3L8p8-3L8p8-3L8p8-3L8p8-3L8p8-3L8p8-3L8p8-3L8p8-3L8p8-3L8p8-1p2-3L8p8-3L8p8-3L8p8-1p2-3L8p8-3L8p8-3L8p8-3L8p8-3L8p8-3L8p8-3L8p8-3L8p8-3L8p8-3L8p8-3L8c8p8-3L8p8-3L8p8-3L8p8-3L8p8-3L8p8-3L8p8-3L8c83p10-3p5-7p1-72p1-3L8c8p1-3L8p8-3L8c8p1-3L8p8-3L8c82p1-3L8c82p1-3L8c82p1-3L8c82p1-3L8p8-3L8c82p1-3L8p8-3L8p8-3L8p8-3L8p8-3L8p8-3L8c8p8-3L8c8p8-3L8p8-3L8c8p8-3L8p8-3L8c82p1-3L8c8p1-3L8p8-3L8c8p1-3L8c8p1-3L8c8p1-3L8c82p1-3L8c8p1-3L8c83p1-3L8c8p1-3L8c8p1-3L8c8p1-3L8c8p1-3L8c8p1-3L8c8p1-3L8p8-3L8c8p1-3L8c82p1-3L8c8p1-3L8c8p1-3L8c8p1-3L8c8p1-3L8p8-3L8c8p1-3L8c8p1-3L8p8-3L8c8p1-3L8c8p1-3L8c8p1-3L8p8-3L8c8p1-3L8c8p1-3L8p8-3L8p8-3L8c8p1-3L8p8-3L8p8-3L8c8p1-3L8c8p1-3L8p8-3L8p8-3L8p8-3L8p8-3L8p8-3L8p8-3L8p8-3L8p8-3L8p8-3L8p8-3L8p8-3L8p8-3L8p8-3L8p8-3L8p8-3L8p8-3L8c8p1-3L8c8p1-7p1-3L8c82p1-3L8c8p1-3L8c8p1-3L8p8-3L8c8p1-3L8c8p1-3L8c8p1-3L8p8-3L8p8-3L8p8-3L8c82p1-72p1-3p5-7p1-7p1-3L8p8-3L8c8p1-3L8p8-3L8p8-3L8p8-3L8p8-3L8c8p1-3L8p8-3L8p8-3L8c8p1-3L8p8-3L8p8-3L8p8-3L8p8-3L8p8-3L8p8-3L8p8-3L8p8-3L8p8-3L8p8-3L8p8-3L8p8-3L8c8p1-3L8p8-3L8p8-3L8c8p1-3L8p8-3L8p8-3L8p8-3L8p8-3L8p8-3L8p8-3L8c8p1-3L8p8-3L8p8-3L8p8-3L8p8-3L8p8-3L8c8p1-3L8p8-3L8p8-3L8p8-3L8p8-3L8c8p1-3L8c8p1-7p1-3L8c8p1-7p1-3L8c8p2-7p1-3L8p8-3L8p8-3L8c8p1-7p1-3L8p8-3L8p8-3L8c8p1-3L8p8-3L8p8-3L8c8p1-3L8c8p1-3L8p8-3L8c8p1-3L8p8-3L8c8p1-3L8p8-3L8c8p1-3L8c8p1-3L8c8p1-3L8c8p1-3L8c8p1-3L8c8p1-3L8c8p1-3L8c8p1-3L8c8p1-3L8c8p1-3L8c8p1-3L8c8p1-3L8c8p1-3L8c8p1-3L8c8p1-3L8c8p1-3L8p8-3L8c8p1-3L8p8-3L8p8-3L8c8p1-3L8c8p1-3G8p1-3L8c8p1-3L8c8p1-3L8c8p1-3L8c8p1-3G8p1-3L8c8p1-3L8p8-3L8p8-3L8c8p1-3L8p8-3L8c8p1-3L8p8-3L8c8p1-3L8p8-3L8c8p1-3L8p8-3L8p8-3L8p8-3L8c8p1-3L8c8p1-3L8c8p1-3L8c8p1-3L8p8-3L8c8p1-3L8p8-3L8c8p1-3L8c8p1-3L8c8p1-3L8c8p1-3L8c8p1-3L8c8p1-3L8p8-3p9-7p1-3L8c8p1-3L8c8p1-3L8c8p1-3L8c8p1-3L8c8p1-3L8c8p1-3L8c8p1-3L8c8p1-3L8c8p1-3L8c8p1-3L8c8p1-3L8c8p1-3L8c8p1-3L8c8p1-3L8c8p1-3L8p8-3L8c8p1-3L8p8-3L8p8-3L8c8p1-3L8p8-3L8p8-3L8c8p1-3L8p8-3L8p8-3L8c8p1-3L8c8p1-3L8c8p1-3L8p8-3L8c8p1-3L8c8p1-3L8c8p1-3L8c8p1-3L8c8p1-3L8p8-3L8p8-3L8p8-3L8p8-3L8p8-3L8c8p1-3L8c8p1-3L8c8p1-3L8c8p1-3L8p8-3L8c8p1-3L8c8p1-3L8c8p1-3L8c8p1-3L8p8-3L8p8-3L8c8p1-3L8c8p1-3L8p8-3L8p8-3L8c8p1-3L8c8p1-3L8p8-3L8c8p1-3L8p8-3L8p8-3L8c8p1-3L8c8p1-73p1-3L8p8-3L8p8-3L8p8-3L8p8-3L8c8p1-3L8c8p1-73p1-3L8p8-3L8p8-3L8c8p1-3L8c8p1-3L8c8p1-3L8c8p1-7p1-3L8c8p1-3L8c8p1-3L8c8p1-3L8p8-3L8c8p1-3L8c8p1-3L8p8-3L8p8-3L8p8-3L8p8-3L8c8p1-3L8c8p1-3L8p8-3L8c8p1-3L8c8p1-3L8p8-3L8c8p1-3L8c8p1-3L8p8-3L8c8p1-3L8c8p1-3L8c8p1-3L8p8-3L8c8p1-3L8c8p1-3L8p8-3L8c8p1-3L8c8p1-3L8c8p1-3L8p8-3L8c8p1-3L8c8p1-3L8p8-3L8p8-3L8c8p1-3L8c8p1-3L8c8p1-7c12p1-2G8p1-76c12p1-72c1p1-78p1-3p5-7c1p1-7c1p1-79p1-3p5-7p1-76p1-3p5-7p1-73p1-3p5-7p1-72c1p1-7c12p1-7c1p1-7c12p1-7c1p1-7c1p1-7p1-3p5-7p1-7c1p1-7c1p1-7c1p1-7c12p1-7c1p1-7c1p1-7p1-3p5-7c1p1-7c1p1-73p1-3p5-7p1-72c1p1-7c1p1-7c1p1-7c12p1-7c1p1-7c1p1-7p1-3p5-7c1p1-73p1-3p5-7p1-7c1p1-7c12p1-72c1p1-798c1p1-7c1p1-72p1-3L8p8-3L8c8p1-7c1p1-73p1-3L8p8-3L8c8p1-72c1p1-72c1p1-73p1-3L8p8-3L8c8p1-72c1p1-7c1p1-73p1-3L8c8p1-74p1-3L8c8p1-73p1-3L8c8p1-725p1-3p5-7p1-3p5-7p1-74p1-3L8c8p1-3L8p8-3L8p8-3L8c8p1-72p1-3L8c8p1-76p1-3L8c8p1-3L8p8-3L8c8p1-73p1-3L8p8-3L8c8p1-74p1-3L8c8p1-7p1-3L8c8p1-3L8p8-3L8p8-3L8p8-3L8c8p1-3L8p8-3L8p8-3L8c8p1-3L8p8-3L8p8-3L8c8p1-7p1-3L8p8-3L8p8-3L8p8-3L8p8-3L8c8p1-7p1-3L8c8c1p1-3L8c8c1p1-7p1-3L8p8-3L8c8p1-3L8p8-3L8p8-3L8c8p1-7p1-3L8p8-3L8p8-3L8c8p1-7p1-3L8c8c1p1-7p1-3L8p8-3L8p8-3L8c8p1-7p1-3L8p8-3L8p8-3L8c8p1-7p1-3L8c8c1p1-3L8c8c1p1-7c1p1-7p1-3L8p8-3L8p8-3L8c8p1-7p1-3L8p8-3L8p8-3L8c8c1p1-7p1-3L8p8-3L8p8-3L8c8p1-7p1-3L8p8-3L8c8p1-7c1p1-72c1p1-3L8c8c1p1-3L8c8p1-7c1p1-7p1-3L8p8-3L8p8-3L8c8p1-3L8p8-3L8p8-3L8c8p1-7p1-3L8p8-3L8c8p1-7p1-3L8p8-3L8p8-3L8c8p1-7p1-3L8p8-3L8p8-3L8p8-3L8c8p1-7p1-3L8p8-3L8c8p1-7p1-3L8p8-3L8c8p1-7p1-3L8p8-3L8c8p1-7p1-3L8p8-3L8p8-3L8c8p8-3L8c8c1p1-3L8c8c12p1-7p1-3L8p8-3L8c8c1p1-3L8c8c12p1-3L8c8p1-3L8c8p1-7p1-3L8c8p1-7p1-3L8p8-3L8p8-3L8p8-3L8c8c1p1-3L8c8c12p1-72p1-3L8p8-3L8c8c12p1-72p1-3L8c8p1-7p1-3L8p8-3L8c8p1-7p1-3L8c8p1-7p1-3L8c8p1-7p1-3L8p8-3L8p8-3L8p8-3L8c8c1p1-7c1p1-7p1-3L8c8p1-3L8c8c1p1-3L8c8c1p1-7c12p1-3L8c8p1-3L8c8p1-7p1-3L8c8p1-7p1-3L8p8-3L8p8-3L8p8-3L8c8c1p1-3L8c8c12p1-72p1-3L8p8-3L8c8c12p1-72p1-3L8c8p1-7p1-3L8p8-3L8c8p1-7p1-3L8c8p1-7p1-3L8c8p1-7p1-3L8p8-3L8p8-3L8p8-3L8c8c1p1-7c1p1-7p1-3L8c8p1-7p1-3L8c8p1-7p1-3L8c8p1-7p1-3L8c8p1-7p1-3L8p8-3L8p8-3L8p8-3L8c8c12p1-72p1-3L8c8p1-7p1-3L8c8p1-7p1-3L8c8p1-7p1-3L8p8-3L8p8-3L8p8-3L8c8c1p1-7c1p1-7p1-3L8c8p1-7p1-3L8c8p1-7p1-3L8c8p1-7p1-3L8c8p1-7p1-3L8p8-3L8p8-3L8p8-3L8c8c12p1-72p1-3L8c8p1-7p1-3L8c8p1-7p1-3L8c8p1-7p1-3L8p8-3L8c8p1-7p1-3L8c8p1-7p1-3L8c8p1-7p1-3L8p8-3L8p8-3L8p8-3L8c8c1p1-3L8c8c1p1-7c1p1-7c1p1-7c1p1-7c1p1-3L8c8c1p1-3L8c8p8-3L8c8c1p1-3L8c8c1p1-3L8p8-3L8p8-3L8p8-3L8p8-3L8c8c1p1-7p1-3L8c8p1-3L8p8-3L8c8p1-3L8p8-5p1-3L8c8c1p1-72p1-3L8p8-3L8p8-3L8p8-3L8p8-3L8p8-3L8c8p8-3L8p8-3L8p8-3L8p8-3L8p8-3L8p8-3L8c8p8-3L8p8-3L8p8-3L8c8p8-3L8p8-3L8p8-3L8p8-3L8c8p8-3L8p8-3L8p8-3L8c84p8-3L8c84p1-3L8c89p8-1c318p3-4c948B8

### cen9

A4/9p1-2p4-12p4-5p7-2p4-6c6p7-1p4-5G9+M9L9+B9+Y9p4-22E9p7-3E9p7-1p7-2E9p7-4p7-22c4p4-5p7-2F9p7-5p7-1c3p6-1F9c7p7-2F9c7p7-2F9p7-1p1-2F9p7-2p4-2F9p7-2p7-1p7-2F9p7-5p7-2p7-3E9p7-4c6p6-2p4-5p7-2F9p7-3E9c7p7-4c6p6-2F9c7p7-4p7-2c7p7-5p7-2F9p7-2E9p7-2p7-3p7-2p7-5F9p7-5p7-22c43D9p7-5p7-1G9+M9p5-2p7-4p6-2F9p7-5p7-1c7p7-5p7-2F9p7-2E9p7-2p7-3p7-2p7-5F9p7-5p7-22c43D9p7-5p7-1G9+M9p5-2p7-4p6-2F9p7-5p7-1p7-3p1-4c6p7-2F9p7-3G9+M9L9+B9+Y9p7-1c3p7-1F9p7-4c6p6-2p7-3p5-3p7-5p5-3c7p7-3c7p7-2F9p7-3p7-5p4-2F9p7-3c7p7-2F9p7-3p7-5p4-2F9p7-3p7-5p4-2F9c7p7-2F9p7-3p7-5p4-6p3-5p7-2L9+B9+Y9F9p7-5c7p7-2F9p7-3c7p7-2F9p7-3c7p7-2F9p7-1p4-2F9p7-2p4-2F9p7-3c7p7-2F9p7-2F9p7-32c7p7-2F9p7-3c7p7-2F9p7-3c7p7-2F9p7-3c7p7-2F9p7-2F9p7-3c7p7-1F9p7-2F9p7-2F9p7-2F9p7-3c7p7-5F9p7-3c7p7-2F9p7-3c7p7-2F9p7-3c7p7-2F9p7-2F9c7p7-2F9p7-3c7p7-2F9p7-3c7p7-2F9p7-3c7p7-1F9p7-2F9p7-3c7p7-2F9C9c7p7-2F9p7-3c7p7-2F9c7p7-2F9p7-3c7p7-2F9p7-3c7p7-2F9p7-2F9p7-3c7p7-2F9p7-3c7p7-2F9p7-3c7p7-2F9p7-3c7p7-2F9p7-3c7p7-2F9c7p7-2F9p7-3c7p7-2F9p7-2F9p7-3c7p7-2F9c7p7-3c7p7-2F9c7p7-2F9p7-3p5-6p1-2F9c7p7-2F9p7-3c7p7-2F9c7p7-2F9p7-3p5-2F9c7p7-2F9p7-3c7p7-2F9p7-3c7p7-2F9c7p7-3p7-2F9p7-3p5-2F9c7p7-2F9p7-3c7p7-2F9c7p7-2F9p7-3p5-2F9c7p7-2F9p7-3c7p7-2F9p7-3c7p7-2F9c7p7-2F9p7-3c7p7-2F9c7p7-2F9p7-32c7p7-2F9p7-3p5-2F9c7p7-2F9p7-3p5-2F9c7p7-2F9p7-2F9p7-3c7p7-2F9c7p7-2F9p7-3c7p7-2F9p7-3c7p7-2F9p7-3c7p7-2F9p7-3c7p7-2F9c7p7-1F9p7-2F9p7-3c7p7-2F9p7-3c7p7-2F9c7p7-2F9p7-3c7p7-2F9c7p7-2F9p7-32c7p7-2F9p7-3p5-2F9c7p7-2F9p7-3p5-2F9c7p7-2F9p7-3p5-2F9c7p7-2F9p7-2F9p7-3c7p7-2F9c7p7-2F9p7-3c7p7-2F9p7-3c7p7-2F9p7-3c7p7-2F9p7-3c7p7-2F9c7p7-1F9p7-2F9p7-3c7p7-2F9p7-2F9p7-3c7p7-2F9p7-3c7p7-2F9p7-3c7p7-2F9p7-3c7p7-2F9p7-3c7p7-2F9p7-3c7p7-2F9p7-3c7p7-2F9p7-3c7p7-1F9p7-3p7-2F9p7-3c7p7-2F9p7-3p7-2F9p7-3c7p7-2F9p7-3c7p7-2F9p7-3p7-2F9p7-3c72p7-2F9p7-3c7p7-2F9p7-3c7p7-2F9p7-2F9p7-3p7-2F9c7p7-2F9p7-2F9p7-3p7-2F9c7p7-2F9p7-3p7-2F9p7-3c7p7-2F9c7p7-2F9p7-3p7-2F9c7p7-2F9p7-2F9p7-3p7-2F9c7p7-2F9p7-3p7-2F9p7-3c7p7-2F9c7p7-2F9p7-3c7p7-2F9c7p7-2p6-3c7p7-2F9c7p7-2p6-3c7p7-3p7-1F9p7-3c7p7-2F9p7-2F9p7-3c7p7-2F9c7p7-2p6-2F9c7p7-2p6-2F9c7p7-2F9p7-2F9p7-3p7-2F9c7p7-2F9p7-2F9p7-3p7-2F9c7p7-2F9p7-3p7-2F9c7p7-2F9p7-3p7-2F9p7-3c7p7-2F9c7p7-2F9p7-3p7-2F9c7p7-2F9p7-3p7-2F9p7-3c7p7-2F9c7p7-2F9p7-3c7p7-2F9c7p7-2F9p7-3c7p7-2F9c7p7-2p6-3c7p7-2F9c7p7-2p6-3c7p7-3p7-1F9p7-3c7p7-2F9p7-2F9p7-3c7p7-2F9c7p7-2p6-2F9c7p7-2p6-2F9c7p7-2F9p7-3c7p7-2F9p7-5F9p7-2F9c7p7-3c7p7-2F9p7-2F9p7-3p7-2F9p7-3c7p7-2F9p7-3c7p7-2F9p7-3c7p7-2F9c7p7-2F9p7-2F9p7-3G9+M9p5-1F9p7-3p7-2F9p7-3c7p7-3c7p7-2F9p7-3c7p7-2F9p7-3p7-2F9p7-3c7p7-3c7p7-2F9p7-3p7-2F9p7-3c7p7-3c7p7-2F9p7-3c7p7-2F9p7-3p7-1F9p7-3c7p7-3c7p7-2F9p7-2F9p7-3p7-1F9p7-3c7p7-3c7p7-2F9p7-2F9p7-3c7p7-2F9p7-2F9p7-3p7-2F9p7-33c7p7-2F9p7-2F9p7-3p7-2F9p7-3c7p7-1F9p7-3p7-2F9p7-3c7p7-2F9c7p7-2F9p7-2F9p7-33c7p7-2F9p7-2F9p7-3p7-2F9p7-3c7p7-2F9p7-3p7-1F9p7-3c7p7-2F9c7p7-2F9p7-2F9p7-3c7p7-2F9p7-3p7-1F9p7-3c7p7-2F9c7p7-2F9p7-2F9p7-3c7p7-2F9p7-3c7p7-2F9c7p7-2F9p7-3c7p7-2F9p7-2F9c7p7-2F9p7-3c7p7-2F9c7p7-2F9p7-3c7p7-2F9c7p7-2F9p7-3c7p7-2F9c7p7-2F9p7-2F9c7p7-2F9p7-3p5-2F9c7p7-2F9p7-3c7p7-2F9c7p7-2p7-3p5-2F9c7p7-2F9p7-2F9p7-3c7p7-2F9p7-2F9c7p7-2F9p7-3c7p7-2F9c7p7-2F9p7-3c7p7-2F9c7p7-2F9c7p7-2p7-3p5-2F9c7p7-2F9p7-2F9p7-3c7p7-2F9p7-2F9c7p7-2F9p7-3c72p7-2F9p7-3c7p7-2F9c7p7-2F9p7-3c7p7-2F9c7p7-2F9p7-2F9c7p7-2F9p7-3p5-2F9c7p7-2F9p7-3c7p7-2F9c7p7-2p7-3p5-2F9c7p7-2F9p7-3p5-2F9c7p7-2F9p7-3p5-2F9c7p7-2F9p7-2F9p7-3c7p7-2F9p7-3c7p7-2F9p7-3c7p7-2F9c7p7-2F9p7-3c7p7-2F9p7-3p5-2F9c7p7-2F9p7-3p5-2F9c7p7-2F9p7-2F9p7-3c7p7-2F9p7-3p5-2F9p7-3p5-2F9c7p7-2F9p7-2F9p7-3c7p7-2F9p7-3c7p7-2F9p7-3c7p7-2F9c7p7-2F9p7-2F9p7-3c7p7-2F9p7-3c7p7-2F9p7-3c7p7-2F9p7-3c7p7-2F9p7-3c7p7-2F9c7p7-2F9p7-3c7p7-2F9p7-32c7p7-2F9p7-3c7p7-2F9p7-3p7-1F9p7-3c7p7-3p7-2F9p7-3p7-2F9p7-3p7-2F9p7-3c7p7-2F9p7-3p7-2F9p7-3c7p7-3p7-2F9p7-3p7-2F9p7-3p7-2F9p7-3c7p7-2F9p7-3p7-2F9p7-3c7p7-2F9c7p7-2F9p7-3c7p7-2F9p7-2F9c7p7-2F9p7-3c7p7-2F9p7-2F9p7-3c7p7-2F9c7p7-2F9p7-3c7p7-2F9p7-2F9p7-3c7p7-2F9c7p7-2F9p7-3p5-2F9c7p7-2F9p7-3p5-2F9c7p7-2F9p7-3p5-2F9c7p7-2F9p7-3p5-2F9c7p7-2F9p7-2F9p7-3c7p7-2F9p7-3c7p7-2F9p7-3c7p7-2F9p7-3p7-2F9c7p7-2F9p7-3c7p7-2F9p7-3p5-2F9c7p7-2F9p7-3p5-2F9c7p7-2F9p7-2F9p7-3c7p7-2F9p7-3c7p7-2F9p7-3c7p7-2F9c7p7-2F9p7-3c7p7-2F9p7-3c7p7-2F9p7-3c7p7-2F9p7-3c7p7-2F9c7p7-2F9p7-3c7p7-2F9p7-3c7p7-2F9p7-3c7p7-2F9p7-3c7p7-2F9p7-3c7p7-2F9p7-3c7p7-2F9p7-2F9p7-3c7p7-2F9p7-3c7p7-2F9p7-3c7p7-2F9c7p7-2F9p7-3c7p7-2F9p7-3c7p7-2F9p7-3c7p7-2F9p7-3c7p7-2F9p7-3c7p7-2F9p7-2F9p7-3c7p7-2F9p7-3c7p7-2F9p7-3c7p7-2F9c7p7-2F9p7-3c7p7-2F9p7-3c7p7-2F9p7-3c7p7-2F9p7-3c7p7-2F9p7-2F9p7-3c72p7-2F9p7-3c72p7-2F9p7-3c7p7-2F9p7-3c7p7-2F9p7-3c7p7-2F9p7-2F9p7-3p7-2F9p7-3c7p7-2F9p7-3p7-2F9p7-3c7p7-2F9c7p7-1F9p7-2F9p7-3c7p7-2F9p7-3c7p7-2F9p7-3p7-2F9p7-3c72p7-2F9p7-3c7p7-2F9p7-3c7p7-2F9p7-2F9p7-3p7-2F9p7-3c7p7-2F9p7-3c7p7-2F9c72p7-2F9p7-2F9p7-3p7-2F9p7-3c7p7-2F9p7-3c7p7-2F9c7p7-2F9p7-3c7p7-2F9c7p7-2F9p7-2F9p7-3c7p7-2F9c7p7-2p6-3c7p7-2F9p7-3p7-2F9p7-2F9p7-3c7p7-2F9c7p7-2p6-3c7p7-2F9p7-3p7-2F9p7-3c7p7-2F9c7p7-2F9p7-3c7p7-2F9c7p7-2p6-2p7-3c7p7-2F9c7p7-2F9c7p7-2F9c7p7-2F9p7-2F9c7p7-2F9p7-3p7-2F9c7p7-1F9G9+M9L9+B9+Y9F9p7-3c7p7-2F9c7p7-2F9p7-3c7p7-2F9p7-2F9c7p7-2F9p7-3c7p7-3c7p7-2F9c7p7-2F9c7p7-2F9p7-2F9c7p7-2F9p7-3p7-2F9c7p7-1F9G9+M9L9+B9+Y9F9p7-3c7p7-2F9c7p7-2F9p7-3c7p7-2F9p7-2F9c7p7-2F9p7-3c7p7-2F9p7-32c7p7-2F9p7-3c7p7-2F9p7-2F9c7p7-2F9p7-3c7p7-2F9p7-2F9p7-3p7-2F9p7-3c7p7-2F9p7-3c7p7-2F9p7-2F9p7-3p7-2F9p7-3c7p7-2F9p7-3c7p7-2F9p7-3c7p7-2F9c7p7-1F9p7-3c7p7-2F9p7-3c7p7-2F9p7-3c7p7-2F9p7-2F9p7-3c7p7-2F9p7-3c7p7-2F9p7-3c7p7-2F9p7-3c7p7-2F9p7-2F9p7-2C9c7p7-2F9p7-3c7p7-2F9p7-2F9p7-2c3F9p7-3c7p7-2F9p7-3c7p7-2F9p7-3c7p7-2F9p7-3c7p7-2F9p7-3c7p7-2F9p7-3c7p7-2F9p7-3c7p7-2F9p7-3c7p7-3c7p7-2F9p7-3c7p7-2F9p7-3c7p7-2F9p7-3c7p7-2F9p7-3c7p7-2F9p7-3c7p7-2F9p7-3c7p7-2F9p7-3c7p7-2F9p7-3c7p7-2F9p7-3c7p7-3c7p7-2F9p7-3c7p7-2F9p7-3c7p7-2F9p7-3c7p7-2F9p7-3c7p7-2F9p7-3c7p7-2F9p7-3c7p7-2F9p7-3c7p7-2F9p7-3c7p7-2F9p7-3c7p7-2F9p7-32c72p7-2F9c7p7-2F9p7-3c7p7-2F9p7-3c7p7-2F9p7-3c7p7-2F9p7-32c7p7-2F9p7-3c7p7-2F9p7-3c7p7-2F9p7-32c7p7-2F9p7-3c7p7-2F9p7-3c7p7-2F9p7-32c7p7-2F9p7-3c7p7-3c7p7-2F9p7-3c7p7-2F9p7-3c7p7-2F9p7-3c7p7-2F9p7-3c7p7-3c7p7-2F9p7-3c7p7-3c7p7-2F9p7-3c7p7-2F9p7-3c7p7-3c7p7-3c7p7-2F9p7-3c7p7-3c7p7-3c7p7-2F9p7-3c7p7-2F9p7-32c7p7-2F9p7-3c7p7-2F9p7-3c7p7-2F9p7-3c7p7-2F9p7-3c7p7-3c7p7-2F9p7-3c7p7-3c7p7-2F9p7-3c7p7-2F9p7-3c7p7-2F9p7-3c7p7-3c7p7-3c7p7-2F9p7-32c7p7-2F9p7-32c7p7-2F9p7-3c72p7-32c7p7-2F9p7-32c7p7-2F9p7-3c7p7-2F9p7-3c7p7-32c7p7-2F9p7-3c7p7-32c7p7-2F9p7-3c7p7-2F9p7-3c7p7-2F9p7-3c7p7-2F9p7-3c7p7-2F9p7-3c7p7-2F9p7-3c7p7-2F9p7-3c7p7-3c7p7-2F9p7-3c7p7-2F9p7-3c7p7-2F9p7-3c7p7-2F9p7-3c7p7-2F9p7-3c7p7-2F9c7p7-2F9p7-2F9p7-3c7p7-2F9p7-2p4-2F9p7-2c4p4-2F9p7-2p5-2F9p7-2c4p4-2F9c7p7-2F9p7-3c7p7-2F9p7-3c7p7-2F9p7-2F9c7p7-2F9p7-3c7p7-2F9c7p7-2F9p7-2F9c7p7-2F9p7-3c7p7-2F9p7-2p4-2F9p7-3p5-2F9p7-3c7p7-2F9c72p7-2F9p7-2F9p7-3c7p7-3c7p7-1c3p1-2F9p7-4c1p1-2F9p7-3c7p7-2F9p7-2F9c72p7-2F9c7p7-2F9p7-2p4-2F9p7-33c7p7-2F9p7-3p5-2F9p7-3c7p7-2F9c72p7-2F9p7-4L9+B9+Y9F9p7-4L9+B9+Y9F9c7p7-2F9p7-2F9p7-4p1-4p1-2F9c7p7-2F9p7-2F9p7-3c7p7-2F9p7-3c7p7-2F9p7-4c1p1-2F9p7-4c1p1-2F9p7-1F9c7p7-2F9p7-4c1p1-2F9p7-1F9c7p7-2F9p7-4c1p1-2F9p7-4c1p1-2F9p7-3c7p7-2F9p7-3c7p7-2F9c7p7-1F9p7-2F9p7-3p7-4c1p1-2F9c7p7-1F9p7-2F9c7p7-1F9p7-2F9p7-3c7p7-2F9p7-2F9p7-2F9p7-3c7p7-2F9p7-4c1p1-2F9p7-4p1-2p5-1F9p7-2F9c7p7-2F9p7-1F9c7p7-2F9p7-4c1p1-2F9p7-1F9c7p7-2F9p7-4c1p1-2F9p7-4c1p1-2F9p7-3c7p7-2F9p7-3c7p7-2F9c7p7-1F9p7-2F9p7-3p7-4c1p1-2F9c7p7-1F9p7-2F9c7p7-1F9p7-2F9p7-3c7p7-2F9p7-2F9p7-2F9p7-3c7p7-2F9p7-3c7p7-2F9p7-4p1-2p5-1F9p7-2F9c7p7-1F9p7-2F9p7-3c7p7-2F9p7-2F9p7-2F9p7-4c1p1-2F9p7-4c1p1-2F9p7-4c1p1-2F9p7-4c1p1-2F9p7-4c1p1-2F9p7-3c7p7-2F9p7-2F9c7p7-1F9p7-3c7p7-1F9p7-2F9p7-3c7p7-2F9p7-3c7p7-2F9p7-2p4-2F9p7-2F9c7p7-2F9p7-3c7p7-2F9p7-2F9c7p7-1F9p7-3c7p7-2F9p7-2F9p7-3c7p7-2F9p7-3c7p7-2F9p7-2p4-2F9p7-2F9p7-3c7p7-2F9p7-3c7p7-2F9p7-2p4-2F9p7-2F9c7p7-2F9p7-2F9p7-3c7p7-2F9p7-2F9p7-3c7p7-2F9c7p7-1F9p7-2F9p7-3c7p7-1F9p7-3c7p7-2F9p7-5F9p7-2F9p7-3c7p7-2F9p7-2F9p7-5F9p7-2F9c7p7-2F9p7-3c7p7-2F9p7-2F9c7p7-1F9p7-3c7p7-2F9p7-2F9p7-3c7p7-2F9p7-3c7p7-2F9p7-2p4-2F9p7-2F9p7-3c7p7-2F9p7-3c7p7-2F9p7-2p4-2F9p7-2F9c7p7-2F9p7-2F9p7-3c7p7-2F9p7-2F9p7-3c7p7-2F9p7-3c7p7-2F9p7-2F9p7-3c7p7-2F9c7p7-1F9p7-2F9p7-3c7p7-1F9p7-3c7p7-2F9p7-5F9p7-2F9p7-3c7p7-2F9p7-2F9p7-5F9p7-2F9p7-3c7p7-2F9p7-2F9p7-5F9p7-2F9p7-3c7p7-2F9p7-2F9p7-5F9p7-2F9p7-3c7p7-2F9p7-2F9c7p7-2F9p7-2F9p7-3p7-1F9c7p7-3c72p7-2p5-2F9c7p7-2F9c7p7-2F9p7-3p7-1c32F9p7-3p7-1c3p3-5p7-32p7-2F9p7-3c7p7-2F9c32F9c3F9c3C9c7p7-2F9c3F9c3F9p7-3c7p7-2F9c3F9c3C9c7p7-2F9c3F9c3F9p7-3c7p7-2F9c3F9p7-3c7p7-2F9c3F9p7-3c7p7-2F9c3F9p7-3c7p7-2F9p7-2E9c7p7-2F9p7-2C9c7p7-2F9p7-2F9c7p7-2F9p7-2F9p7-3p7-2F9p7-2F9p7-3c7p7-2F9p7-2F9c7p7-2F9p7-2F9p7-3p7-2F9p7-2F9p7-3c7p7-2F9p7-3c7p7-2F9p7-2F9p7-3p7-2F9p7-2F9p7-3c7p7-2F9p7-2F9p7-3c7p7-2F9p7-1F9p7-3p7-2F9p7-2F9p7-3c7p7-2F9p7-2F9p7-3c7p7-2F9p7-3p7-2F9p7-3c7p7-2F9p7-3c7p7-2F9p7-3c7p7-2F9p7-2F9p7-2p6-2F9p7-2F9p7-3c7p7-2F9p7-2C9c7p7-2F9p7-3c7p7-2F9p7-2C9c7p7-2F9p7-3p7-2F9p7-3c7p7-2F9p7-2F9p7-2C9p7-2F9p7-3c7p7-2F9p7-3p7-2F9p7-3c7p7-2F9p7-3c7p7-2F9c7p7-2F9p7-2C9p7-2F9c7p7-2F9p7-2F9c7p7-2F9c7p7-2F9p7-2F9p7-2C9p7-2F9p7-2C9c7p7-2F9p7-2F9p7-2C9c7p7-2F9p7-3c7p7-2F9p7-3c7p7-2F9p7-3c7p7-2F9p7-3c7p7-2F9p7-2F9p7-2C9p7-2F9p7-3c7p7-2F9p7-1F9p7-3c7p7-2F9p7-3p7-2C9c7p7-2F9p7-2C9p7-4p1-2F9p7-3p5-2F9p7-3c7p7-2F9p7-3c7p7-2F9c3F9p7-3c7p7-2F9p7-3c7p7-2F9G9+M9p5-2F9p7-3p7-2F9p7-1F9p7-3c7p7-2F9p7-2F9G9+M9c3F9c7p7-3p7-2F9p7-2F9p7-2F9p7-2F9p7-3c7p7-1F9p7-1C9c72p7-2F9p7-2E9p7-3c7p7-2F9p7-3c7p7-2F9p7-2E9p7-3c7p7-2F9p7-2c4c7p7-2F9c7p7-2F9p7-4L9+B9+Y9F9p7-2E9F9p7-3c7p7-2F9p7-3c7p7-2F9c7p7-2F9p7-2F9c7p7-2F9c7p7-2F9p7-2F9p7-32c7p7-2F9p7-3c7p7-2F9c7p7-2F9D9p1-2F9c7p7-2F9D9p1-2F9c7p7-2F9p7-3c7p7-2F9c7p7-2F9D9p1-2F9c7p7-2p6-2F9c7p7-2F9D9p1-2F9c7p7-2p6-2F9c7p7-2F9D9p1-2F9c7p7-2F9D9p1-2F9c7p7-2F9D9p1-2F9c7p7-2F9p7-3c7p7-2F9c7p7-2F9D9p1-2F9c7p7-2p6-2F9c7p7-2F9D9p1-2F9c7p7-2p6-2F9c7p7-2F9D9p1-2F9c7p7-3c7p7-2F9c3F9p7-3c7p7-2F9p7-3c7p7-1c3C9p7-1c3F9p7-3p7-1c3F9c7p7-3p7-2F9p7-3p7-2F9p7-3c7p7-2F9p7-3c7p7-2F9p7-3p7-1c3F9p7-3p7-5p7-2F9c7c3F9p7-3p5-2F9p7-5c7p7-2p5-2F9c7p7-2F9p7-5p7-1C9p7-2F9c72p7-2F9p7-3c7D92F9p7-3p5-2F9p7-5p7-2p7-4p6-2F9c7p7-2F9p7-3p5-2F9p7-5c7p7-2F9p7-4L9+B9+Y9F9p7-3p5-2F9p7-2F9p7-3c7p7-2F9p7-3c7p7-2F9c7p7-2F9G9+M9C9c7p7-2F9p7-2F9c7p7-2F9p7-2F9p7-3c7p7-1F9p7-2F9p7-3c7p7-2F9p7-3p7-4p1-2F9p7-3p5-2F9p7-3c7p7-2F9p7-3c7p7-32p7-1F9c7p7-2F9p7-3c7p7-2F9p7-3c7p7-2F9c7p7-1c3F9c7p7-1c3F9p7-4p1-2F9c7p7-1c3F9p7-4p1-2F9c7p7-1c3F9p7-4p1-2F9p7-5L9+B9+Y9F9p7-3c7p7-1F9p7-3c7p7-1F9c7p7-2F9p7-3c7p7-1F9c7p7-2F9p7-3c7p7-2F9p7-3c7p7-2F9c3F9G9+M9p2-3c7p7-1F9p7-3c7p7-1F9c7p7-2F9p7-3c7p7-1F9c7p7-2F9p7-3c7p7-2F9p7-3c7p7-2F9c3F9G9+M9p2-3c7p7-2F9c3F9G9+M9p2-3c7p7-2F9p7-3c7p7-1c3C9p7-1p3-1c3C9p7-1c3F9p7-2F9p7-2F9p7-3c7p7-2F9p7-3c7p7-2F9p7-3c7p7-2F9p7-2F9p7-3c7p7-2F9p7-3p7-2F9p7-3c7p7-2F9p7-3p7-1F9p7-3c7p7-33p7-2F9p7-32c7p7-2F9p7-3p7-1c3F9p7-3c7p7-2F9p7-1C9p7-32c7p7-2F9p7-3p7-1c3F9p7-3c7p7-2F9p7-2F9p7-1c3F9p7-3p7-2p4-6c3F9p7-4p7-1p7-2F9c7p7-2F9p7-1c3F9p7-5c7D9p4-5p7-1c3c7D9p4-5c7p7-2c7p4-5c7p7-2F9p7-5p7-2c3F9p7-3E9L9+B9+Y9F9p7-2F9p7-2p2-3c7p7-1p3-1F9c7p7-2F9p7-22p5-3p7-1p3-6D9F9p7-1c3C9p7-3D9p1-3p7-2c5p5-2F9p7-5p7-2p7-1p3-5p7-5p7-3E9p7-3c7p7-2p7-5c7p7-5p7-2E9p7-3c7p7-52p7-32c7p7-5p7-2E9p7-3p7-2F9p7-2p5-2F9c7p7-1F9p7-2p5-2F9p7-4p6-2F9c7p7-2F9c7p7-2p6-2F9c7p7-2F9c7p7-2F9c7p7-4c6p6-2F9p7-4p6-2F9c72p7-2F9p7-4p6-2F9c7p7-2F9p7-4p6-2F9c7p7-2F9p7-3c7p7-2F9p7-5p7-22c5E9p7-2F9p7-5p7-3E9p7-1c7D9p4-2F9p7-2F9p7-5p7-3p5-2F9c7p7-3p7-52p7-1p7-5c7p3-5p7-1p3-5p7-3p7-2p5-2F9p7-5p7-3E9p7-2F9p7-52c7p7-5p7-3E9p7-3c7p7-4p7-2E9p7-3c7p7-5c7p7-5p7-3E9p7-3c7p7-5p7-3p5-3c7p7-5p7-2F9c7p7-2F9c7p7-2F9p7-4c7p7-2F9c7p7-2F9c7p7-1F9p7-4c7p7-2F9c7p7-2F9c72p7-2F9c72p7-2F9c7p7-2F9p7-2c1p1-2F9c7p7-2F9p7-5p7-2F9c7p7-2F9c7p7-1F9p7-5p7-2F9c7p7-1F9c7p7-2F9c7p7-2F9c7p7-2F9c7p7-2F9c7p7-2F9c7p7-2F9c7p7-2F9c7p7-2F9c7p7-2F9G9+M9p5-2F9c7p7-1F9p7-2F9c7p7-2F9p7-2F9c7p7-2F9c7p7-2F9p7-2F9c7p7-2F9G9+M9p5-2F9c7p7-5p7-2F9c7p7-2F9c7p7-1F9c7p7-2F9G9+M9p5-2F9c7p7-2F9G9+M9p5-2F9G9+M9p5-6p5-1F9G9+M9p5-7p6-1F9G9+M9p5-2F9c7p7-1F9G9+M9p5-2F9c7p7-2F9G9+M9E9c3F9c7p7-2F9c7p7-2F9c7p7-2F9c7p7-2F9c7p7-2F9c7p7-2F9p7-4p6-2F9c7p7-2F9c7p7-2F9c7p7-2F9c7p7-2F9c7p7-2F9c7p7-2F9c7p7-2F9c7p7-2F9c7p7-2F9p7-2F9c7p7-2F9c7p7-2F9c7p7-2F9c7p7-2F9c7p7-2F9c7p7-2F9c7p7-2F9c7p7-2F9c72p7-2F9c7p7-2F9c72p7-2F9c7p7-2F9c72p7-2F9c72p7-2F9c7p7-2F9c7p7-2F9c7p7-4p6-2F9c7p7-2F9c7p7-2F9c7p7-2F9c7p7-2F9p7-2F9p7-4p6-2F9c7p7-2F9c7p7-2F9p7-4p6-2F9p7-4p6-2F9c7p7-2F9c7p7-2F9c7p7-2F9c7p7-2F9c7p7-2F9c7p7-2F9c7p7-2F9c7p7-2F9c7p7-2F9c7p7-2F9c7p7-2F9c7p7-2F9c7p7-2F9c7p7-2F9p7-4p7-2F9c7p7-2F9G9+M9p5-2F9G9+M9E9c7p7-2F9G9+M9c7p7-2F9G9+M9E9c7p7-2F9G9+M9E9c7p7-2F9G9+M9E9c7p7-2F9G9+M9E9p7-2F9c7p7-2F9c7p7-2F9c7p7-2F9c7p7-2F9c7p7-2F9p7-5c7p7-2F9p7-5p7-2F9c7p7-2F9c7p7-2F9c7p7-2F9c72p7-2F9c7p7-2F9c7p7-2F9c7p7-2F9c7p7-2F9c7p7-2F9c7p7-2F9p7-5p7-2F9p7-4p6-2F9p7-1p3-5p7-5p7-2p7-3p7-5p7-2p7-3p7-4p7-5p7-3p7-5p7-2p5-2F9p7-55p7-4

### cen10

p3-5p2-5p1-2p4-5p2-3E10A10G10p4-5p2-3E10p1-7p2-3E10G10B10E10G10p1-2E10c1p1-2E10c1p1-2p5-6c1p1-2E10c1p1-2E10c1p1-2E10c1p1-2E10p1-6p1-2E10p1-2E10c1p1-2E10c1p1-2E10c1A10p2-7p1-5G10c8p8-2E10c1p1-2E10c1p1-2E10c1p1-2E10p1-6c1p1-2E10p1-7c1p1-2E10c1p1-2E10p1-6c1p1-2E10c1p1-2E10c1p1-2E10c1p1-2E10p1-6c1p1-2E10c1p1-2E10c1p1-2E10c1p1-2E10p1-6c1p1-2E10p1-6c1p1-2E10c1p1-2E10c1p1-2E10c1p1-2E10c1p1-2E10c1p1-2E10p1-5E10p1-3B10E10p1-2c5E102p1-2B10E10p1-5c7p7-2E10p2-5C10B10p5-6p8-2E10c1p1-2E10c1p1-2E10c1p1-5E10p1-2B10E10p1-5p7-2E10c1p1-5E10p1-2B10E10p1-5c7p7-2c5E10C10B10p5-2E10c1p1-2c5E10p5-2E10p1-3B10p5-2E10p1-3B10E10c1p1-5p1-2E10p5-22E10p1-5E10p1-3p7-3E102p5-2E10p5-3E10p5-2p5-3p5-2p5-3E10p5-2p5-3E10p5-3E10p5-2p5-3p5-2p5-3E10p5-2p5-3E102p5-3E10p5-2E102p5-3E10p5-32E10p5-3E10p5-2p5-3E10p5-2p5-3E102p5-3E102p5-22p5-7E10c1p1-2p5-2p5-7E10c1p1-2E10c1p1-2p5-1E10p1-3p6-3E10p5-32E10p5-3E10p5-2p5-3E10p5-2c5p5-2c5p5-2c5p5-2c5p5-2c5p5-2p5-3E10p5-2c5p5-2c5p5-2c5p5-2c52p5-2c5p5-2c5p5-2c5p5-2p5-6A10p8-3p5-2p5-3p5-22p5-3p5-22c5p5-22c5p5-2c5p5-2c52p5-2c54p5-2c5p5-2c5p5-2c5p5-23c5p5-2c5p5-2c5p5-22c5p5-2c5p5-2c5p5-2c5p5-2c5p5-2c5p5-2c5p5-2c5p5-2c5p5-2c5p5-2c5p5-2c5p5-2c5p5-2c5p5-2c5p5-22c5p5-22c5p5-22c5p5-22c5p5-2c5p5-22c5p5-2c5p5-2c5p5-2c5p5-2c5p5-22c5p5-2c5p5-2c5p5-2c5p5-2c5p5-2c5p5-2c5p5-22c5p5-2c5p5-2c5p5-2c52p5-2c55p5-2c52p5-2c52p5-2c52p5-2c52p5-2c52p5-2c52p5-2c52p5-2c52p5-2c5p5-2c5p5-2c5p5-2c52p5-2c52p5-2c5p5-2c5C10c63p6-2c52p5-2c5p5-2c5C10c6p6-2c5p5-2c52p5-22c5p5-2c52p5-2c5p5-2c5C10c6p6-2c5p5-2c52p5-22c5p5-2c5p5-2c52p5-2c52p5-22c5p5-2c52p5-2c52p5-22c5p5-2c52p5-22c5p5-2c52p5-2c52p5-22c5p5-2c5p5-22c5p5-2c5p5-2c5p5-22c5p5-2c5E10p5-2c5p5-2c5p5-2c5E10p5-2c5E10p5-2c5p5-2c5p5-2c5p5-2c5p5-22c5p5-2c5p5-22c5p5-24c5p5-22c5p5-22c5p5-2c5p5-2c5p5-2c5p5-23c5p5-23c5p5-22c5p5-2c5p5-2c5p5-2c5p5-2c5p5-2c5p5-2c5p5-2c53p5-2p5-3p5-22c5p5-22c5p5-2c5p5-2c5p5-2c5p5-2c5p5-2c5p5-2c5p5-2c53p5-2p5-3p5-2p5-3p5-2c5p5-2c5p5-3p5-2p5-3c6p6-2c5p5-2c5p5-2c5p5-2c5p5-2c5p5-2c5p5-2c52p5-2c52p5-2c52p5-2c5p5-3p5-2p5-3c6p6-2c5p5-2c5p5-2c5p5-2c5p5-2c52p5-2c5p5-2c53p5-2c5p5-2c5p5-2c5p5-1p4-2c5p5-2c5p5-2c5p5-2c5p5-1p4-2c52p5-2c5p5-2c5p5-2c52p5-2c5p5-2c5p5-2c5p5-2c5p5-2c5p5-2c5p5-22c5p5-2c5p5-2c5p5-2c52p5-2c5p5-2c52p5-2c5p5-2c5p5-2c5p5-2c5p5-2c52p5-2c5p5-2c5p5-2c5p5-2c5p5-2c5p5-2c5p5-2c53p5-2c5p5-22c5p5-23c54p5-2c5p5-23c55p5-2c5p5-2c5p5-2c5p5-22c5p5-23c54p5-2c53p5-2c5p5-2c5p5-22c5p5-22c5p5-23c57p5-2c5p5-2p5-1p4-2p5-22c58p5-2c5p5-2c5p5-2c5p5-22c5p5-22c5p5-22c5p5-2c5p5-22c5p5-2c5p5-22c5p5-2c5p5-22c5p5-22c5p5-22c5p5-22c5p5-22c5p5-2c5p5-2c53p5-23c5p5-2c5p5-22c52E10B10p5-2c52E10B10c5E10B10p5-2c52p5-2p5-3c52p5-2c5p5-2c5p5-22c5p5-2c5p5-2c5p5-22c5p5-22c5p5-22c5p5-2c5p5-2c5p5-2c5p5-2c5p5-22c5p5-22c5p5-22c52p5-22c5p5-22c52p5-2c52p5-23c5p5-2c5p5-22c52p5-2c52p5-2c5p5-2c5p5-2c52p5-2c5p5-2c5p5-2p5-3c5p5-2p5-3c6p6-2c5p5-2c5E10c5E10p3-5c5E10p3-52c5E10p3-5c5E10p3-5c5E10p3-5c5E10p3-5E10c5E10p3-5E103c5E10p3-5c5E10p3-5c5E10p3-5c5E10p3-5E10c5E10p3-5E10p5-1p4-2p5-2c52p5-2c5E10c5E10p5-2c5p5-7c5p5-2c5E10c5p5-2c5p5-2c5p5-7c5p5-2c5p5-7c5p5-22c5p5-2c5p5-2c5E10c5p5-2c5p5-22c5p5-22c5p5-2c5E10c5E10p5-2c5E10p5-2c5E10c52E10p5-2c5E10c5p5-2c5E10p5-2c52E10p5-6p1-2p5-2c5E10p5-2c5p5-2c5p5-7p5-2c5p5-2c52p5-7c5p5-7c5p5-7c52E10c52p5-2c5p5-2E10p5-2c5E10c5E10c5E10c5p5-2c5E10B10E10p5-2c5E10c5p5-1c5E10p5-1c5p5-1p1-2p5-1E10c1p1-2c5p5-1E10c1p1-2c5p5-2c5p5-2c5p5-7c5p5-7c5p5-2c5E10c5E10c5E10c5p5-2c5p5-2E10p5-2c5E10c5E10c1p1-2c5E102c1p1-2E10c1p1-2c5p5-2E10c1p1-5p5-2E10c1p1-2c5p5-2E10c1p1-5p5-2c52p5-2E10p5-6p1-2c5p5-2c5E10p5-2c5E10c5p5-2c5E102c12p1-5E10c12p1-2c5p5-2c5E10p5-2c5E10p5-2c5E10p5-2p5-7p4-5c2p2-52c5E10p3-5p5-2c5E10p3-5p2-5p5-2c5E10p3-5p5-2c5E10c3c5E102C10p7-2c5E10p5-2c5p5-2c5p5-2c5p5-2c5E10p2-5p5-2c5E10p2-5c5E10p3-5p5-22c5E10p2-5c5E10p3-5p5-2c5E10p3-5p5-2c52E10p5-2c5E10c3c52E10p5-2c5p5-22c5p5-23c5p5-23c5E10p5-2c5E10c5E10c52E10p5-2c5E10p5-2c5E10p5-2c5p5-23c5E10p5-2c52E10p5-23c5E10p5-28c5E10p5-2c52p5-2c5E10p5-7E10c3p5-6c3C10p1-5c5E10c3c5p5-2c5p5-2E10c1p1-2c5E10p3-5p5-1E10p1-2c5p5-2E10c1p1-2c5E10p3-5p5-1E10c1p1-2c5p5-2E10p1-5c5E10p3-5p5-2c5E10p5-2c5E10p3-5p5-2c5E10p5-2c5E10p5-2c5E10p5-22c5E10c52E10p5-2c5E10c3c5p5-2c5E10p5-25c5E10p5-2c5E10c5E10c5E10c53E10c52E10c5p5-23c5p5-22p5-3p5-2c5E10c52E102c52E10c52E10c5E10c52p5-2c5p5-22c5E10p5-2c5E10c5E10c5E10c53E10c52E10c5p5-23c5p5-22p5-3p5-2c5E10c52E102c5E10c52E10c5E10c52p5-2c5E10p5-2c5E10c3c5p5-2c5E10p5-25c5E10p5-2c5E10c5E10c5E10c52p5-2c5p5-2c5E10c52p5-22c5p5-2c5E10c53E10c52p5-2c5E10c52E102c52E10c53E10c5E10c53E10c53E10c53E10c52E10c52p5-2c5E10c5E10c5E10c5E10c5E10c5E10c5E10c5E10c5E10c5E10p5-2c5p5-22E10c12p1-2E10c32p3-5p5-2E10c1p1-2c5E10c32E10c1p1-2p5-2c5p5-2E10p1-5p5-2c52E10c1p1-2c5p5-2c5p5-2E10p1-5c52E10c5p5-2c5E10c5E10p3-5c5E10c52E10c5E10c5E10c5E10c5E10c5E10c5E10p5-2c5p5-6p8-2E10c12p1-2E10c12p1-2p5-2E10c1p1-2E10A10p6-8E10c12p1-2E10c1p1-2p5-2p5-6c1p1-2c5E10p5-2c5E10p5-2E10c12p1-5p5-2E10c12p1-2E10c1p1-5c5E10B10c52E10c1p1-5c1p1-2E10c1p1-5p5-6p8-2E10c1p1-2E10c1p1-2E10c13p1-2E10c1p1-5c5p5-2E10c1p1-2E10c12p1-2E10c1p1-5c5p5-2E10c12p1-2E10p1-5p5-6p8-2E10c1p1-2E10c12p1-2E10c1p1-5p5-6p8-2E10c1p1-2E10c1p1-5c1p1-5p5-6p8-2E10c1p1-2E10c13p1-5p5-2E10c1p1-2E10c1p1-2E10c1p1-2E10p1-2p5-1p4-5c5E102p1-5c5E10c5E10p2-5c5E10c5E102c1p1-2c5E10p5-2c5E10c5p5-2E10c12p1-2p5-2E10c1p1-2E10c12p1-2p5-2c5p5-7E10c1p1-5p5-22p5-7E10A10p7-5p5-6c1p1-2c5p5-2E10c1p1-2p5-2c5E10p5-2E10c1p1-5p5-2c5E10c3p5-3p1-2c5E10c1p1-2p5-2c5p5-2E10c1p1-2c5p5-2c52E10p5-2E10p1-5c5p5-22E10c1p1-2p5-22E10c1p1-2E10c1p1-2E10p1-5c5E10p5-22E10c1A10E10c1p1-2E10c12p1-2E10c13p1-2E10c1p1-2E10p1-3c5p5-2E10c12p1-2E10c1p1-2E10p1-3c5p5-2E10c1p1-5c5E102c12p1-5E10p1-5c32p3-5B10E10p7-2p5-2p5-8B10c5E10c1p1-2c5E10c1p1-2p5-22c5E102c1p1-5E10c1p1-5E10c13p1-6B10E10c7p7-3

### cen11

p1-4c161c271p2-3c441D11c175p1-2c592p5-2c4193p4-1c3142p3-1A11c3136C11c26p2-3c2129p2-5c2179p2-3c5150p5-1A11c388C11c23p2-3c2240B11c5p5-1c3c548p5-1c324p3-1c3170p3-1c426p4-2c5p5-1c3c5151p5-1c318c489p4-1c322p3-1c384p3-1c322p3-1c386c525p5-2c5157p5-2c526p5-2c554p5-2c54p5-2c58p5-2c54p5-22c518p5-1c148p1-2c45p4-2c4330p4-2c418p4-2c53p5-2c5p5-1c3c5p5-1c3291p3-5c256p2-5c286p2-4c127p1-4c137p1-4c1237p1-3c479p4-1c411p4-1c44p4-1c423

### cen12

F12H12D12p6-1C12E12p3-4p6-8p4-12p4-82p3-4p6-7p4-1p3-8p3-7p4-1p3-4p6-8p4-82p3-4p6-8D12p6-8p4-8D12p6-8p3-8p4-8p6-8p4-1D12p7-8D12p6-8D12p6-1D12p6-1D12p6-1D12F12D12p6-43p6-3p6-4p6-8p2-4p6-4c52p6-1p6-8p4-8D12p6-8p3-8p4-8p6-8p4-1D12p7-8D12p6-8D12p6-1D12p6-1D12p6-1D12F12D12p6-43p6-3p6-4p6-8p2-4p6-4c52p6-4c5p6-7c8p5-1D12p6-1D12p6-7A12D12p6-8p7-1D12p6-1p6-8D12p6-1D12p6-1p7-8p4-1p3-4F12D12p6-1D12p6-7c8B12F12p2-4c5p2-5p6-42c6p1-4p6-1c24p6-4c5c6p1-4p7-4p6-4c53F12c72p2-3p8-32p8-4F12c72p2-3p8-32p8-4p6-1C12p2-4c53p6-3c4p8-1c2p6-1c2D12p6-4F12c7p2-4p6-7p6-4F12c7p2-4p6-7D12p6-4F12c7p2-4p6-7D12p6-4F12c7p1-4p6-4F12c7A12D12F12c7p2-4p6-7p6-3p6-4F12c7p2-4p6-7p6-4F12c7p2-4p6-7p6-43p6-8p2-5p2-4p6-2p4-8c1c54p6-4p6-1c23p6-1c23F12p6-3c43p8-1p6-3c22p6-12c2p6-1c2p6-1c23F12p6-3c44p8-1p6-3c22p6-3c43p2-3c42p2-3c42p2-3c42p2-4c5p6-4p2-7p7-4c5c6p1-4F12c7p2-4p6-7p6-43F12c7p2-4p7-4p6-49F12c72p5-7c2p6-3c4p2-7c82p2-3c43p2-3c42p2-3c43p2-3c42p2-4c5c6p2-4c5F12c7p2-4p6-7p6-4F12c7p2-4p6-4F12c7p2-4p6-42F12p6-43F12p6-47F12c73c5p2-7c8p2-4c52p6-4c5p6-4F12c73p5-7p2-4c5F12c73p5-7p2-4c5p2-7c8p2-5p2-4p2-7c8p2-4c52p6-4c5p6-4F12c73p5-7p2-72c8p2-8c12p2-7p2-5c62p1-7c83p2-5p4-7c87p2-7c82p2-8c1p3-7c8p2-72c8p2-7c8p2-72c8p2-7c8p2-7c8p2-7c8p2-7c82p2-7c83c23p4-1c2p4-2c3p4-7c26p4-7p2-7c810p2-7c816p2-4c52p2-8c1p2-8c1p2-7p2-8c1p2-72c8p2-8c1p2-8c1p2-72c8p2-7c8p2-8c12p2-7c83p2-8c12c27p4-7p2-7c85B12p6-3c43c22p6-7c8p2-3c2p6-7c8p2-3p2-7c8p2-7c8p2-8c12p2-7c25p4-7c22p4-7p2-7c84p2-7c23p6-7c8p2-3p2-7c8p2-3p2-7c8p2-8c12p2-72c8p2-7c82c25p4-7p2-3c42c22p6-7c814p2-5p4-7c8p2-8c12p2-72p4-7c84p2-5p4-7c8p4-7p6-7c82p6-8c13p2-6p2-7p2-8c1p2-7p2-8c12p2-72c8p2-7c8p2-5G12c8B12c3p4-7p2-7c8p2-7c82p2-7c82p2-8c12p2-7p2-8c13p2-72c8p2-7c8B12c3p4-7p2-7c82c23p4-7p2-7c83p2-72p6-7c8p2-72p2-3c46c22p6-3c42c2p6-3c44c22p6-7c8p2-3c28p4-7c82p2-5p4-6p2-6c7p5-7p2-5p4-7c8p6-1c2p6-7c8p2-5c6D12p1-7c82p2-7c82p2-5c62p4-5c62p4-7c83p6-7c8p6-7c8p6-7c8p6-7c8p6-4c53p1-4c55c6p2-4c56c6p2-7c82p6-1c2p6-1c2p6-12c22p6-1c23p6-12c2p6-1c2p6-1c2p6-1c2p6-1c2p6-1c2p6-13c2p6-13c2p6-1c2p6-3p6-12c26p6-1c22p6-1c23p6-1c2p6-1c2p6-1c2p6-1c2p6-1c2p6-1c2p6-1c22p6-1c22p6-1c22F12c72p3-4A12c27p6-1c2p6-1c26p6-1c2p6-1c2p6-1c24p6-1c211p6-12c2p6-1c2p6-1c2p6-1c22p6-1c22p6-1c29p6-1c2p6-1c2p6-1c22p6-4c5A12p6-1c22p6-1c2p6-1c2p6-1c2p6-8p4-1p6-1c22p6-1c2p6-1c2p6-1c23p6-1c214p6-1c22p6-1c2p6-1c2p6-1c2p6-1c22p6-1c2p6-1c22p6-1c2p6-1c23p6-1c2p6-4c53D12c5p4-1p6-1c2p6-12c2p6-1c2p6-1c2p6-1c22p6-2p7-4c53p7-1c2p6-1c2p6-1c22p6-1c2p6-1c2p6-1c22p6-1c2p6-1c2p6-1c2p6-1c22p6-7c82p2-7c82p2-3c49p2-7c8c22F12c714E12p4-7c8p4-7p6-7c82p2-7c8p2-8c13p2-72c8p2-5p7-8c12p2-7p2-8c13p2-72c8p2-5p7-8c12p2-72c8p2-8c12p2-72c83p2-7c82c25p6-7c8p2-32c43c23p6-1c26p6-1c25p6-1c25p6-1c25p6-7c89p2-5p4-7c8p4-7p6-7c82p2-7c8p2-8c1p2-7p2-5c6p7-8c1p2-7c8p2-8c12p2-7p2-8c1p2-72c8p2-8c13p2-7c8p2-7c8p2-7c83p2-7c86p2-7c8p2-8c13p2-72c8p2-72c8p2-7c8p2-7c82p2-6c72p1-7c8c26p4-7c26p4-7p2-3c43c22p6-3c44p2-3c44c22p6-3c42p2-7c813p2-5p4-7c8p4-7c82p6-7c83p2-5p4-7c8p4-7c82p6-1c2p6-1c2p6-7p2-7p4-7c82p6-1c2p6-1c2p6-7c8p2-5c6p4-1c213F12c7p5-7p2-5p4-7c8p4-7c82c6p4-5c62p4-7c8p4-7c82c6D12c5A12p6-7c8p2-5D12c52p1-5p4-1c2c8p2-7c8p2-8c1E12p4-1c22p6-8p5-7c8p6-8p5-7c8p6-7c83p6-8p5-7c8p6-7c88F12c72c54p1-4c55p1-4c54c6p2-4c53c6c2p6-1c23p6-1c2p6-1c2p6-1c2p6-1c2p6-1c2p6-1c2p6-4c5A12c2p6-1c2p6-1c22p6-1c2p6-1c2p6-4A12c2p6-1c2p6-1c22p6-1c2p6-1c2p6-1c2p6-1c2p6-1c2p6-4c5A12c2p6-1c2p6-1c24p6-1c23p6-1c22p6-3c4p8-1p6-12c26p6-1c23p6-1c2p6-3c43p8-1p6-12c27p6-1c24p6-1c23p6-1c23p6-1c2p6-1c2p6-1c24p6-1c23p6-1c23p6-1c2p6-3c46p8-1p6-1c25p6-3c42p8-1F12c72p3-4A12c26p6-3c4p8-1p6-1c2p6-3c4p8-1p6-1p6-3c4p8-1p6-3c42p8-1p6-1p6-3c4p8-1p6-3c4p8-1p6-1p6-3c42p8-1p6-1c26p6-1c23p6-3c42p8-1p6-1p6-3c4p8-1p6-3c4p8-1p6-1p6-3c4p8-1p6-3c42p8-1p6-3c4p8-1p6-1c27p6-3c42p8-1p6-3c42p8-1p6-1p6-3c4p8-1p6-3c4p8-1p6-1p6-3c42p8-1p6-1c26p6-1c23p6-3c42p8-1p6-1p6-3c4p8-1p6-3c4p8-1p6-1p6-3c4p8-1p6-3c42p8-1p6-3c4p8-1p6-1c27p6-3c42p8-1p6-1c28p6-3c42p8-1p6-1p6-3c4p8-1F12c7C12p8-1p6-1p6-3c4p8-1p6-1c2p6-3c4p8-1p6-1c2p6-3c4p8-1p6-1p6-3c4p8-1p6-1c28F12c2p6-1c2p6-3c4p8-1p6-4c5p1-3p8-1p6-1c2p6-4c5p1-3p8-1p6-1c24F12c2p6-3c4p8-1p6-4c5p1-3p8-1p6-1c2p6-4c5p1-3p8-1p6-4A12c2p6-1c22p6-1c22p6-1c22p6-1c22p6-4c517p8-1c210p4-6c79F12c76p6-7c823D12p1-7c86D12p1-7c82p4-7c812p4-7c897D12p1-7D12p1-7c82D12p1-7D12p1-7c84D12p1-4c5G12c82D12p1-7c82D12A12c210p4-7c847D12p1-7c82D12p1-7c82D12p1-7D12p1-7c84D12p1-4c5G12c82D12p1-7c82D12A12c210c45p3-4p6-42p6-8C12c42p3-4p6-3c4p3-4p6-3c4p3-4p6-3c4p3-4p6-1c2p4-8c15C12c42p3-4p6-42p6-8C12c42p3-4p6-3c4p3-4p6-42p6-8C12c4D12p6-4p2-5c6p3-8c2p8-1C12p8-1D12p6-1p3-8c13p2-4p6-3H12c4p2-4c5p6-7p2-4p6-3p8-1c2p6-3H12p2-6p8-1p6-3c4H12p2-4p6-4c52p6-4c5p6-4p6-8p5-2p8-6D12p6-42c5p6-7p1-4p6-7p2-4F12p6-7p2-4F12p6-42p6-8p2-4p6-8p2-4p6-8c1p2-4p6-4p6-8c1p2-4p6-4c5p6-8p2-8B12D12c5p6-8p2-4H12p2-3c4p8-1c42p8-1D12c52p6-8p2-4H12p2-8p2-4c5p6-8p2-4H12p2-4p6-3p8-1D12c5p6-8p2-4p6-1D12c5p6-4p7-4p6-44p6-3c4p8-4p6-42p6-3c4p8-4p6-4p6-1p8-1D122p6-7D12G12D12p6-7A12p3-4H12p3-4G12

### cen13

p2-11p8-9c11G13/21.0c1p8-11c1p8-10G13/21.0c1p8-11c13c84p1-7c8p1-7c8p1-72c8p1-7c8p1-7p1-5p11-7p1-74c83p1-7c8p1-72c8p1-7c8p1-7c8p1-73c8p1-7c8p1-72c84p1-7p1-2c32p9-7p1-73c83p1-7c8p1-7c8p1-7c8p1-7c82p1-7c8p1-7c8p1-7c8p1-74c8p1-7c8p1-7c8p1-73c82p1-7c85p1-72c82p1-72p1-10G13/21.0p1-72c8c1c8p1-73c8p1-7c8p1-7c8p1-73c8p1-7c8p1-72c8p1-7c8p1-73c82p1-73c8p1-72c8p1-7c8p1-73c8p1-7c82p1-75c1c82p1-73c8p1-72c82p1-7c8p1-7c8p1-72c8p1-72c8p1-75c82p1-7c82p1-73c8p1-72c8p1-7c1c8p1-72c8p1-7c1c8p1-7c8p1-7c8p1-73c8p1-7c82p1-72c8p1-7c8p1-72c8p1-7c8p1-72c8p1-72c8p1-7c8p1-73c8p1-7c8p1-72p1-3p4-7p1-75c1c83p1-72c8p1-73c8p1-73c15p8-11c1p8-112c12c83p1-7c82c13c8p1-72c82p1-7c82p1-72c8p1-7c8p1-4c5p11-7c8p1-7c8p1-7c8p1-7c8p1-72c82p1-7c8p1-7c19c84p1-72c82p1-7c82p1-7c8p1-75c82p1-7c82p1-7c82p1-7c8p1-77c8p1-7c82p1-77c82p1-7c82p1-73c8p1-73c8p1-7c1c8p1-72c8p1-7c1c8p1-7c8p1-7c8p1-73c8p1-7c8p1-73c8p1-72c8p1-7c8p1-72c8p1-74c8p1-7c8p1-72c8p1-72c8p1-7c8p1-73c8p1-7c8p1-78c1c83p1-72c8p1-73c8p1-73c15p8-11c1p8-112c12c83p1-7c82c13c8p1-72c82p1-7c82p1-72c8p1-7c8p1-7c82p1-7c8p1-7c8p1-7c8p1-72c82p1-7c8p1-72c82p1-72c82p1-7c8p1-7c17c83p1-72c82p1-7c82p1-7c8p1-75c82p1-7c82p1-7c82p1-7c8p1-77c8p1-7c82p1-74p1-8p3-7p1-74p1-5G13/21.0c8p1-72p1-5G13/21.0c8p1-72c8p1-72c82p1-2c3p9-7c8p1-7c82p1-7c8p1-7c84p1-7c82p1-7c8p1-7c8p1-7c8p1-7c8p1-72c8p1-72c8p1-4G13/21.0c8p1-72p1-4G13/21.0c8p1-73c8p1-72c8p1-79c8p1-7c8p1-72c82p1-73c8p1-7c8p1-73c86p1-7c8p1-7c8p1-75c82p1-72c8p1-72c83p1-72p1-6c7p5-7c8p1-73c8p1-72c8p1-7c8p1-72c8p1-7p1-3p4-7p1-72c8p1-72c8p1-72c82p1-72c8p1-7c82p1-7c8p1-7c8p1-72c8p1-77c82p1-7c82p1-72c84p1-73c8p1-79c82p1-7c82p1-7c84p1-72c83p1-72c82p1-7c8p1-73c8p1-7c8p1-7c8p1-7c82p1-73c8p1-7c82p1-7c8p1-72c8p1-72c82p1-76c8p1-7c1c8p1-6c7p11-7p1-73p1-6p11-7p1-73c8p1-73c8p1-72c8p1-7c8p1-7c8p1-7c8p1-7c8p1-7c8p1-7c8p1-7c8p1-72c8p1-76c82p1-7c8p1-72c84p1-72c8p1-75c82p1-7c82p1-74c82p1-7c82p1-7c84p1-72c8p1-75c82p1-72c82p1-7c82c1p8-11c12c84p1-7c82p1-76c82p1-7c86p1-72c84p1-72c84p1-72c83p1-7c8p1-72c8p1-7c8p1-73c8p1-73c82p1-7c8p1-76c84p1-75c8p1-72c8p1-73c8p1-7c8p1-72c8p1-74c82p1-76c8p1-72c8p1-77c8p1-7c8p1-75p1-6p1-72p1-6p1-74p1-6p5-7p1-77p1-6p1-73p1-3c4p4-7c8p1-7c8p1-7c84p1-7c84p1-74c83p1-73c83p1-7c82p1-73c83p1-7c86p1-7c82p1-7c82p1-73c83p1-7c85p1-7c8p1-7c85p1-7c84p1-7c8p1-7c8p1-7c8p1-7c82p1-7c8p1-7c86p1-7c8p1-7c8p1-7c82p1-7c82p1-5p11-7c8p1-7c82p1-7c8p1-7c8p1-7c8p1-7c82p1-7c84p1-7c84p1-7c8p1-7c82p1-7c84p1-72c8p1-7c8p1-76c8p1-73c8p1-74c8p1-76c8p1-7c8p1-72c8p1-73c8p1-7c8p1-75c8p1-7c8p1-7c82p1-7c8p1-72c8p1-7c82p1-73c8p1-72c8p1-72c812p1-6p11-7c83p1-6p11-7c88p1-73c8p1-72c82p1-72c82p1-7c86p1-7c8p1-7c8p1-7p1-4c5

### cen14

p5-7p1-2G14/22p1-2p4-5p7-8E14/22p1-5p7-5c6G14/22c2p4-5G14/22p2-7p1-5c62p7-5c6G14/22p1-5c62p7-5c6G14/22c2p4-5G14/22p1-5c6p7-1p4-5G14/22p1-2c339p8-2c313p8-2c325p8-4c5406D14/22c521p4-5c68p4-5c62D14/22c567p4-5c64p4-5c65p4-5c63p4-5c619p4-5c62p4-5c64p4-5c64p4-5c64p4-5c64p4-5c66p4-5c6D14/22c5347D14/22c562D14/22c54p4-5c66p4-5c62D14/22c536p4-5c64p4-5c66p4-5c619p4-5c63p4-5c64p4-5c63p4-5c63p4-5c64p4-5c64p4-5c64p4-5c64p4-5c63p4-5c64p4-5c63p4-5c63p4-5c63D14/22c57p4-5c697p7-5c6409G14/22p1-7p2-5G14/22p1-7c8G14/22B14/22p2-7p1-4p2-7c818p2-5G14/22c8p1-5G14/22p1-7c8p2-5G14/22p1-2c3p4-5p7-5c6G14/22c84p2-5G14/22c8p1-5G14/22p1-7c8p2-5G14/22p1-2c3p4-5p7-5c6p7-5c69G14/22p1-2G14/22p1-5G14/22p1-7c82p2-5G14/22p1-5G14/22p1-5G14/22p2-3p3-5c671G14/22p2-7p2-5G14/22p1-7c8G14/22B14/22p2-7p1-4p2-7c85p2-5G14/22c8p1-5G14/22p1-7c8p2-5G14/22p1-2c3p4-5p7-5c6p7-5c65G14/22p1-2G14/22p1-5G14/22p1-7c82p2-5G14/22c8p1-5G14/22p1-7c8p2-5G14/22p1-2c3p4-5G14/22c83p1-5G14/22p2-7c83p4-5c62G14/22p1-5G14/22p1-5G14/22p1-5G14/22p1-7c8c1p4-2c3E14/22

### cen15

p9-10H15D15+L15c1p9-10H15D15+L15p1-4c5p1-4c5p1-4p1-3p5-11p3-4p1-3c5p1-3c4p5-10p1-3p5-3p1-4c5p1-3c4p5-10p1-3p5-3p1-3c4p1-3c4p5-3p1-3c4p1-4c5p1-4p1-3c4p1-4c5p1-42c5p1-4c5p1-4c5p1-3c4p1-3p5-3p1-3c4p1-4c5p1-4c5p1-4c5p1-4p1-3c4p1-3c4p1-4c5p1-4c5p1-4c5p1-42c5p1-4c5p1-4c5p1-4c5p1-4c5p1-4c5p1-4c5p1-4c5p1-4c5p1-4c5p1-4c5p1-4c5p1-4c5p1-4c5p1-4c5p1-4c5p1-4c5p1-4c5p1-4c52p1-4c5p1-4c5p1-4c5p1-4c5p1-4c52p1-4c5p1-4c5p1-4c5p1-4c5p1-4c5p1-4c5p1-4c52p1-4c5p1-8p10-4p1-4c5p1-4c52p1-4c5p1-4c5p1-4c5p1-4c52p1-4c5p1-4c5p1-4c5p1-4c52p1-42c5p1-4c5p1-4c5p1-4c5p1-4c5p1-4c5p1-4c5p1-4c5p1-4c5p1-4c5p1-4c5p1-4c5p1-4c5p1-4c5p1-4c5p1-4c5p1-4c5p1-4c5p1-4c5p1-4c53p1-4c5p1-4c5p1-4c5p1-4c5p1-4c5p1-4c5p1-4c5p1-4c5p1-7c8D15+L15c5p1-6c7p9-4A15p5-1c5p1-4A15p5-1c5p1-4A15p5-6c7p9-4p1-4c5p1-4c5p1-6c7p9-4p1-4A15p5-6c7p9-4c5p1-4c5p1-6p9-4c5p1-4c5p1-6p9-4c5p1-6p9-4c5p1-6p9-4c5p1-4c52p1-4c52p1-4c5p1-6p9-4c5p1-4c5p1-6c7p9-4A15c5p1-4A15c5p1-4A15p5-6c7p9-4p1-4c5p1-4c5p1-6c7p9-4p1-4A15p5-6c7p9-4c5p1-6p9-4c5p1-6c7p9-4c5p1-4c5p1-6p9-4c5p1-4c5p1-6p9-4c5p1-6p9-4c5p1-6p9-4c5p1-4c52p1-4c52p1-4c5p1-6p9-4c5p1-4c5p1-6c7p9-4A15c5p1-4A15c5p1-4A15p5-6c7p9-4p1-4c5p1-4c5p1-6c7p9-4p1-4A15p5-6c7p9-4c5p1-6p9-4c5p1-4c5p1-6p9-4c5p1-4c5p1-4c5p1-4c5p1-42c5p1-4c5p1-4c5p1-4c5p1-4c5p1-4c5p1-4c5p1-4c5p1-4c5p1-4c5p1-4c5p1-4c5p1-4c5p1-4c5p1-4c5p1-4c5p1-4c5p1-4c5p1-4c5p1-4c5p1-4c5p1-4c5p1-4c5p1-4c5p1-4c5p1-4c5p1-4c5p1-4c5p1-4c5p1-4c5p1-4c5p1-4c5p1-4c5p1-4c5p1-4c5p1-4c5p1-4c5p1-4c5p1-4c5p1-4c5p1-4c5p1-4c5p1-4c52p1-4c5p1-4c5p1-4c5p1-4c5p1-4c5p1-4c5p1-4c5p1-4c5p1-4c5p1-4c5p1-4c5p1-4c5p1-4c5p1-4c5p1-4c5p1-4c5p1-4c5p1-4c5p1-4c5p1-4c5p1-4c5p1-4c5p1-4c5p1-4c5p1-10J15p10-4p1-4c5p1-4c5p1-4c5A15c2D15+L15p1-4c52p1-4c5p1-4c5p1-4c5p1-4c5p1-4c5p1-4c5p1-4c5p1-4c5p1-4c5p1-4c5p1-4c5p1-4c5p1-4c5p1-4c5p1-4c5p1-4c5p1-4c5p1-4c5p1-4c5p1-4c5p1-4c5p1-4c5p1-4c5p1-4c5p1-4c5p1-42c5p1-4c5p1-4c5p1-4c5p1-4c5p1-4c5p1-4c5p1-4c5p1-42c5p1-4c5p1-4c5p1-42c5p1-4c5p1-4c5p1-4c5p1-4c5p1-4c5p1-42c5p1-4c5p1-42c5p1-4c5p1-4c5p1-42c5p1-4c5p1-4c5p1-42c5p1-4c5p1-4c5p1-6c7p9-4p1-4c5p1-4c5p1-42c5p1-4c5p1-4c5p1-6c7p9-4A15p5-6c7p9-4p1-4c52p1-4c54p1-4c52p1-4c5p1-4c5p1-4c5p1-4c54p1-4c52p1-6p9-4p1-6c72p9-4p1-4c57p1-6p9-4p1-6p9-4p1-6c72p9-4p1-4c57p1-6p9-4p1-6p9-4p1-4c57p1-6p9-4p1-4c5p1-3c4c53p1-9D15+L15p1-4c52p1-9D15+L15p1-4c52p6-4p1-9D15+L15p1-7p9-10p1-3p1-4p9-4p1-4p9-3p1-4p9-10p1-42p9-42p1-4p9-3p1-4p1-2p1-3B15K15p2-4p2-3p2-4J15p2-3D15+L15p7-2

### cen16

c22p2-6p8-9p4-5p7-8A1/16/19/5p10-6p8-1p10-5p7-10p2-7p9-10c2p2-6c8p8-3p7-10p2-4p8-5p7-5c72p8-6p8-9B16E1/16/19/5p7-53p7-2c59p5-9p1-8p1-9c26p2-9p1-8p1-9c29p2-5p4-5c79p7-5c42p4-5c410p4-5c4p4-9p2-9p2-5c419c645p6-9c423p4-6A1/16/19/5c105c475D1/16/19/5p7-4c7p7-4c722p7-4c722p7-3c69p6-2c511p5-2c511p5-3c65p6-3c85p8-5c410p4-5c498c65p6-3c66p6-3c87p8-3c82p8-3c8p8-3c8p8-3c8p8-3c82p8-3c813p8-3c82p8-3c8p8-3c8p8-3c8p8-3c82p8-3c82p8-3c8p8-3c8H16/19A1/16/19/5c10p10-3c66p6-3c87p8-3c82p8-3c8p8-3c8p8-3H16/19c10p10-3c82p8-3c813p8-3c82p8-3c8p8-3c8p8-3c82p8-3c82p8-3c8p8-3c8H16/19A1/16/19/5c10p10-3c8H16/19A1/16/19/5c10p10-3c84p8-9c221p2-3c8p8-3c8p8-3c8p8-3c83p8-3c8p8-3c8p8-3c8p8-3c8p8-3c8p8-3c8p8-3c8p8-3c82p8-3c8H16/19A1/16/19/5c10p10-3c8H16/19A1/16/19/5c103p10-3c82p8-9c2p2-9c236p2-3c66p6-3c67p6-3c62p6-3c68p6-3c65c82p8-3c6p8-2c5E1/16/19/5c89p8-3c63p6-4c73p7-3c6p6-4c73p7-3c6p6-4c74p7-3c6p6-3c6p6-4c76p7-5c414c641p6-9c252p2-3c63p6-3c6p6-32c68p6-32c613p6-8p5-6I16c22p2-6c96p9-5p4-6p9-10c56p5-3c620F16/19I16c22p2-6I16c2p2-6I16p2-6I16c27p2-6I16c22p2-6I16c2p2-6I16c2p2-6I16c23p2-6I16c22p2-8p1-6I16c23p2-6I16p2-6I16p2-6I16p2-6I16c22p2-6I16c22p2-6I16p2-3c62F16/19I16c2p2-6I16p2-6I16p2-3c63p6-9p4-6I16p2-3c64F16/19I16p2-6I16p2-6I16p2-6I16c2p2-6I16p2-4c72I16p2-6I16c2p2-6I16p2-6I16p2-8p1-82p1-6I16p2-8c1p1-6I16p2-8c1p1-6I16p2-8c1p1-6I16c22p2-6I16p2-8c1p1-6I16c2p2-6I16c2p2-6I16p2-6I16p2-8p1-82c1p1-6I16c2p2-6I16p2-6I16c2p2-6I16p2-6I16c2p2-6I16p2-6I16c2p2-6I16p2-8p1-8p1-6I16p2-8p1-6I16p2-8c1p1-6I16c2p2-6I16p2-8c12p1-6I16p2-8c1p1-6I16p2-8c1p1-6I16p2-6I16p2-8c1p1-9c24p2-9c29p2-6c973p9-6I16c22p2-6I16c24p2-6I16p2-3c6p6-10I16c23p2-6I16p2-6I16c25p2-6I16p2-3c62F16/19I16c2p2-6I16c2p2-6I16c22p2-6I16c22p2-6I16c2p2-6I16c23p2-6I16p2-3c6F16/19I16c2p2-3

### cen17

c1308p30-31c11928p19-28c12265p22-19c12112p21-24c1182p18-21c129p29-21c129p29-21c129p29-21c129p29-21c12948p29-30c11821p18-21p12-13c15p15-13P17p2-13p15-9p11-92c1138p11-4c811p8-10c137p13-16c29p2-4c8p8-4c82p8-13c15p16-14c163p16-13p15-9p11-13c15p15-13c15p15-4p8-14p16-7p11-14c167p16-4p8-10c13M17c15p15-13c152p15-4p8-14c16p16-13c15p15-13p16-2p8-13c167p16-14c163p16-7c9p9-4c8p8-9p11-4c82p8-9p11-4c88p8-14c1618c1413AP17+N17c162p16-14c162p16-7c9p9-4c8p8-9p11-4c86p8-14c1618c147AP17+N17c16p16-13c16p16-13c163p16-13c152p15-9p11-13p15-9p11-13c1527p15-10c104J17c102J17c102J17c1041p10-14c1624p16-14c1659p16-14c16103P17c224p2-15c132p1-5c655p6-14c7p7-14c72p7-14c75p7-15p1-14c7p7-14c7p7-15p1-14c73p7-14c766p7-16c16P17c163P17c1620p16-13c1619p16-14c717p7-8c123p12-13c1521p15-16c1621p16-14c113p1-14c719p7-13c1552O17c173p1-14c169c1p1-15c119p1-15c117p1-14c1630p1-153p1-7p11-710c117p11-13c15p15-13c152p15-13p15-3c9p9-14P17c22p2-13p15-13c15p15-13c15p15-132c15P17c2p2-13c15O17p1-14p16-4p11-15c15p15-13O17p15-13O172p15-132O172p15-13O172p15-132c15P172p2-14p10-15AP17+N17p16-13O17AP17+N17c164p16-13c145p15-132O17c14p14-15p15-13p15-1p3-13p15-132c15p16-13P17p2-13p16-14P17p2-13p15-16p2-13p15-16p2-164p2-13P17p2-13P17p2-1623p2-13P17p2-16p2-13P17p2-1621p2-13P17p2-162p2-14P17p2-163c2p2-7p3-4p12-16p2-162c3p3-16p2-166p2-13P17p2-162p2-14P17p2-163c2p2-7p3-4p12-16p2-162c3p3-16p2-16p2-13c15p15-1p7-13P17p2-164p2-14P17p2-16p2-15p14-16p2-168p3-1c3p3-16p2-14c16p16-13c153c16p16-142c16P17p7-15O17p1-6p13-14p16-14AP17+N17p16-13p15-132p15-9p11-13p15-10p2-13p15-132p15-5M17p16-13p15-133p15-7p3-4p8-13p15-16p2-13p15-7p3-4p8-13p15-16c2p2-13p15-13c15p15-16p2-1623p2-13p15-16p2-166c22p2-163c2p2-16p2-6p14-16p2-164c2p2-13p16-132O17c152O17c13p1-14p16-13c16AP17+N17p16-13p16-14P17p16-14P17c163p16-13p15-13p16-14P17p2-10p12-14p16-13c16p16-13c152p15-134p15-10p12-13c16p16-13p15-6c8p8-13c15p15-13p15-16c2p2-13p15-132p15-12p2-5p8-12p15-162p2-5p8-13p15-162p2-5p8-13p15-5p8-13P17p15-3

### cen18

I18L18G18.1p4-5p7-9L18p7-9p12-2G18.1p4-5p7-9p12-2G18.1p5-9p1-2G18.1p4-9p1-2G18.1p4-7I18p12-2G18.1p5-9p1-2G18.1p4-9p12-2G18.1p4-5G18.1I18B18G18.1p5-9p12-2G18.1p4-5p7-9p12-2G18.1p4-9p12-2G18.1p4-9p12-2G18.1p4-10I18p12-2G18.1p4-7p4-6G18.0p8-10E18p1-2c7p7-2c72p7-3c847p8-2c73G18.1c413p4-10c93p9-6G18.0c82p8-3c83p8-3c86J18.1c113p11-7J18.1p11-7J18.1c11p11-9p12-2p7-9p12-2G18.1p4-9p12-92p12-2G18.1p4-9p12-2G18.1p4-9p12-92p12-2G18.1p4-9p12-2G18.1p4-9p12-2G18.1p4-9p12-2G18.1p4-9p12-2p7-9p12-2G18.1p4-9p12-2p7-9I18B18G18.1p4-9p12-2G18.1J18.1A18p12-2p7-9p12-2G18.1p4-9p12-2p7-9B18G18.1p4-9p12-1p1-2p7-9p12-2G18.1p4-9p12-1p12-2G18.1p4-9p12-9p12-2G18.1p4-9p12-2p7-9p12-2p7-9p12-2G18.1p4-9p12-2p7-9p12-2G18.1p4-9p12-2G18.1p4-9p12-2G18.1p4-9p12-2G18.1p4-9p12-2G18.1p4-9p12-2p7-9p12-2G18.1p4-9p12-2G18.1p4-9p12-2G18.1p4-9p12-2G18.1p4-9p12-2p7-9p12-2G18.1p4-9p12-2G18.1p4-9p12-2G18.1p4-9p12-2G18.1p4-9p12-2G18.1p4-9p12-2G18.1p4-9p12-2G18.1p4-9p12-2p7-9p12-2G18.1p4-9p12-2G18.1p4-9p12-2p7-9p12-2G18.1p4-9p12-2G18.1p4-9p12-2G18.1p4-9p12-2p7-9p12-2p7-9p12-2G18.1p4-9p12-2G18.1p4-9p12-2p7-9p12-2p7-9p12-2G18.1p4-9p12-2G18.1p4-9p12-2G18.1p4-9p12-2G18.1p4-9p12-2G18.1p4-9p12-2G18.1p4-7I18p12-2p7-9p12-2G18.1p4-9p12-2G18.1p4-9p12-2p7-9p12-2G18.1p4-9p12-2G18.1p4-9p12-2p7-9p12-2p7-9p12-2p7-9p12-2G18.1p4-9p12-2G18.1p4-9p12-2G18.1p4-9p12-2G18.1p4-9p12-2G18.1p12-2p7-9p12-2G18.1p4-9p12-2p7-9L18p8-9p12-9p12-2p7-9p12-2p7-9L18p8-9L18p8-9p12-2p7-9L18p8-9p12-9I18p12-2p7-9p12-2p7-9L18H18/20p12-9I18p12-2p7-9L18H18/20p12-9I18p12-2p7-9L18p8-9p12-9I18p12-2p7-9p12-2G18.1p4-6G18.0p8-9p12-2G18.1p4-9p12-92p12-2G18.1p4-9p12-2G18.1p4-9p12-2p7-9p12-2p7-9L18p8-9p12-2p7-9p8-9p12-1I182p12-2G18.1p4-5p7-9p12-2p7-9L18p8-9p12-92p12-2p7-9L18p8-9p12-2p7-9p8-9p12-2G18.1p4-7L18c86p8-11c122p12-2G18.1p4-2G18.1c42p4-2c92p9-2c9p9-7B18c9p9-7B18p9-2G18.1c12p12-2G18.1c12p12-2G18.1p4-2G18.1c12p12-2G18.1c12p12-2G18.1c12p12-2G18.1p4-2G18.1c12p12-2G18.1p4-7p4-2G18.1p4-2G18.1c49p4-9p8-9c122p12-9c212p2-7J18c12p12-7J18p12-3c83c10p10-7J18c122p12-7J18c122p12-7J18c123c102p10-2c92p9-2G18.1p4-7c2B18G18.1c4p4-2c93p9-2c9p9-2c92p9-2c9p9-2G18.1p4-2G18.1p4-2G18.1p4-2c9p9-7B18p9-7B18c92p9-2G18.1p4-2G18.1c12p12-2G18.1c12p12-2G18.1p4-2G18.1c12p12-2G18.1p4-2G18.1p12-2G18.1p4-2G18.1p4-2G18.1p4-2G18.1c12p12-2G18.1c12p12-2G18.1p4-2G18.1c4p4-2G18.1p4-2G18.1p4-2G18.1c42p4-2G18.1p4-2p9-6c32G18.1p4-2p9-12c3p9-12c3p9-12c3p9-2G18.1p4-2p9-2c73p7-9p12-2c7p7-9p12-2p9-2G18.1p4-2G18.1p4-2p9-2G18.1p4-2G18.1p4-2c9p9-2G18.1c4p4-2c72G18.1J18c12p12-7J18p12-2G18.1p4-2p7-2G18.1c4p4-2c7p7-2p7-9p4-2p7-9p4-2G18.1p4-11c10p10-2G18.1p4-11c10p10-2G18.1p4-7B18c9p9-11c10p10-7B18c9p9-7B18c92p9-2G18.1p4-2G18.1c42p4-7c4p4-2G18.1c4p4-2G18.1c42p4-7c4p4-2G18.1p4-7c42p4-2G18.1p4-2G18.1c42p4-11c103p10-2p9-2G18.1c42p4-9p12-2p9-2G18.1c423p4-6c324p3-9p4-6G18.0c86B18p9-7B18I18p12-2G18.1c4p4-2G18.1p4-2G18.1p4-2G18.1p4-2G18.1p4-2G18.1c4p4-2G18.1c4p4-6c32G18.1c12p12-2G18.1p4-2G18.1c4p4-2G18.1c12p12-2G18.1p4-2G18.1c4p4-2G18.1c12p12-2G18.1p4-2G18.1c122p12-2G18.1c12p12-2G18.1p4-2G18.1c12p12-2G18.1p4-2G18.1c12G18.1p4-2G18.1p4-8p7-2G18.1c4p4-2G18.1c12p12-2G18.1p4-2G18.1p4-2G18.1c12p12-2G18.1p4-2G18.1p4-2G18.1p4-2G18.1c12p12-2G18.1p4-2G18.1p4-2G18.1p4-2G18.1c12p12-2G18.1p4-2G18.1c12p12-2G18.1c4p4-2G18.1c4p4-5H18/20c7p7-2G18.1p4-6c3G18.0p8-5H18/20c72c3p3-6c3p3-6G18.0c84p8-9p12-2G18.1c42p4-6c33G18.1p4-2G18.1p4-2G18.1p4-2G18.1p4-2G18.1p4-2c7p7-2p7-11c10p10-2G18.1p4-2c7p7-2c7p7-2G18.1c42p4-2G18.1p4-11c10p10-11c10p10-2G18.1p4-11c10p10-7B18c9p9-7B18c9p9-2G18.1p4-2G18.1p4-2G18.1c4p4-2G18.1c4p4-7p12-2G18.1c122p12-2G18.1c122p12-2G18.1c12p12-2G18.1p4-2G18.1p4-2G18.1c123p12-2G18.1c12p12-2G18.1p4-2G18.1c123p12-2G18.1p4-2G18.1c123p12-2G18.1c12p12-2G18.1p4-2G18.1c123p12-2G18.1p4-2c9p9-7B18p9-2G18.1c4p4-2G18.1p4-2G18.1p4-6c3p7-2G18.1c4p4-2G18.1p12-1p9-2G18.1p4-2G18.1c4p4-2G18.1p4-2G18.1p4-2G18.1c42p4-2c7p7-2G18.1p4-2G18.1p4-2G18.1c42p4-2G18.1p4-2G18.1c42p4-2p7-22G18.1p4-2G18.1p4-9p12-2G18.1p4-6p8-2p7-9p12-2p7-2G18.1p4-9p12-2p7-2G18.1p4-9p12-2p7-2G18.1p4-9p12-2p7-2c7p7-9p12-2p7-2G18.1p4-9p12-2c7p7-2c7p7-2p5-2c7p7-2p9-2G18.1p4-9p12-2G18.1p4-2G18.1p4-2G18.1p4-7c42p4-2G18.1c42p4-7p4-2G18.1c4p4-2c72p7-2G18.1c4p4-2c7G18.1J18c12p12-2p7-2G18.1p4-11p10-2G18.1p4-2G18.1p4-2G18.1p4-2G18.1p4-11c102p10-11p10-2G18.1p4-11c103p10-112c104p10-2G18.1p4-11c102p10-11p10-2G18.1p4-11c103p10-112c104p10-2G18.1p4-11c10p10-2G18.1p4-11p10-2c9p9-7B18p9-2G18.1p4-2G18.1p4-2G18.1p4-2G18.1c12p12-7p12-2G18.1c124p12-2G18.1c12p12-2G18.1p4-2G18.1p12-2G18.1c4p4-2G18.1c12p12-2G18.1J18.1c32c9p9-22c7p7-2G18.1c4p8-2G18.1p4-2G18.1p4-2G18.1c12p12-2G18.1p4-2G18.1c4p4-2G18.1p4-2G18.1p12-2G18.1p4-2G18.1p4-2G18.1p12-2G18.1p4-2G18.1p4-2G18.1c4p4-2G18.1p4-2G18.1p4-2G18.1c42p4-2G18.1p4-2G18.1p4-2G18.1c42p4-2p7-2G18.1p4-2G18.1p4-2G18.1c42p4-2c73p7-2c7p7-9p12-2p7-2G18.1p4-2G18.1p4-9p12-2p7-2G18.1p4-9p12-2p7-2G18.1p4-9c12p12-9p12-2p7-2G18.1p4-9p12-1p7-2c73p7-2c72p7-2p9-2p7-9p12-2p7-2G18.1c4p4-2p7-9p12-9c12p12-2G18.1c4p4-2G18.1p4-2G18.1c4p4-2G18.1c4p4-2G18.1p4-2G18.1c414p4-7c97p9-2G18.1p4-2G18.1c46p4-2G18.1p4-2G18.1p4-2G18.1p4-2G18.1p4-2c72p7-2p9-2p7-2G18.1p4-2c7p7-2G18.1p4-2G18.1p4-11c102p10-11c103p10-2G18.1p4-11c10p10-2G18.1p4-11p10-2G18.1p4-11c10p10-2G18.1p4-10p5-2G18.1J18.1p11-2G18.1p4-10p5-2G18.1c42p4-2G18.1c12p12-2G18.1p4-2G18.1c12p12-2G18.1c4p4-2G18.1p4-2G18.1p12-2G18.1p4-2G18.1p4-2G18.1p4-2G18.1p12-2G18.1p4-2G18.1p4-2G18.1p12-2G18.1p4-2G18.1p4-2G18.1c4p4-2G18.1c12p12-2G18.1p4-2G18.1p4-2G18.1c4p4-2G18.1c12p12-2G18.1p4-2G18.1p4-2G18.1c4p4-2c7p7-2G18.1c4p4-2G18.1c42p4-2c7p7-2G18.1p4-2G18.1c4p4-2c7p7-2G18.1p4-2G18.1p4-2G18.1c47p4-6G18.0c83p8-9p12-2c73p7-9p12-2p7-2G18.1c48p4-2G18.1c4p4-9p12-2c72p7-2p9-2G18.1p4-2G18.1c4p4-2p7-22G18.1p4-2p9-2G18.1p4-9p12-2G18.1c43p4-7c4p4-2G18.1p4-7c42p4-7p4-2G18.1c43p4-2c717p7-2G18.1c430p4-6c38G18.1c458p4-2G18.1c47p4-2G18.1p4-2G18.1c42p4-2G18.1p4-2G18.1c49p4-2G18.1c48p4-7p9-2G18.1p4-2G18.1c4p4-2G18.1c4p4-2G18.1p4-2G18.1p4-2G18.1p4-2G18.1c4p4-2G18.1c42p4-2G18.1c45p4-2G18.1c46p4-2G18.1c44p4-2G18.1c4p4-2G18.1c49p4-2G18.1c417p4-2G18.1c42p4-2G18.1c430p4-2G18.1p4-2G18.1c4p4-7c92p9-2G18.1c4p4-2G18.1p4-2G18.1p4-2G18.1p4-2G18.1p4-7p9-2G18.1c48p4-2G18.1p4-2G18.1c4p4-2G18.1c42p4-2G18.1c42p4-2G18.1p4-2G18.1c43p4-2G18.1c4p4-2G18.1c42p4-2G18.1c430J18.1c116p11-2G18.1p4-2G18.1J18.1c115p11-2G18.1p4-2G18.1p4-2G18.1J18.1c11p11-2G18.1p4-7p4-2G18.1p4-2G18.1c4p4-2G18.1p4-2G18.1p4-2G18.1J18.1c112p11-2G18.1p4-7p4-2G18.1p4-2G18.1c43p4-7p4-2G18.1c42p4-2G18.1c4p4-2G18.1p4-2G18.1c410p4-6c35G18.1p4-6c3G18.1c4p4-6c32G18.1c45p4-2G18.1c43p4-2G18.1c430J18.1c115p11-2G18.1p4-2G18.1J18.1c115p11-2G18.1p4-2G18.1p4-2G18.1J18.1c11p11-2G18.1p4-2G18.1J18.1c11p11-2G18.1J18.1c11p11-2G18.1J18.1c11p11-2G18.1c412J18.1c115p11-2G18.1p4-2G18.1J18.1c115p11-2G18.1p4-2G18.1p4-2G18.1J18.1c11p11-2G18.1p4-2G18.1J18.1c11p11-2G18.1J18.1c11p11-2G18.1J18.1c11p11-2G18.1p4-7p4-2G18.1c42p4-2G18.1p4-2G18.1p4-2G18.1J18.1c112p11-2G18.1p4-7c4p4-2G18.1c43p4-7p4-2G18.1c44p4-2G18.1p4-2G18.1c47p4-6c36G18.1p4-6c3G18.1c4p4-6c3G18.1c4p4-7p4-2G18.1p4-7J18c5p5-6c3G18.1p4-2G18.1p4-2G18.1p4-2G18.1p4-2G18.1c4p4-2G18.1p4-2G18.1p4-2G18.1p4-2G18.1p4-7J18p5-2G18.1p4-7J18p5-2G18.1p4-7p4-2G18.1c4p4-2G18.1p4-2G18.1c43p4-2G18.1p4-2G18.1p4-2G18.1p4-2G18.1c42p4-2G18.1p4-2G18.1p4-7J18p5-2G18.1p4-7J18p5-2G18.1p4-7p4-2G18.1p4-2G18.1p4-2G18.1c4p4-2G18.1c44p4-2G18.1p4-2G18.1p4-7c4p4-2G18.1c4p4-2G18.1p4-2G18.1c4p4-2G18.1c43p4-2G18.1c4p4-2G18.1p4-2G18.1c45p4-7p4-2G18.1c42p4-7c4p4-7c43p4-2G18.1c4p4-2G18.1c43p4-2G18.1c4p4-2G18.1c44p4-2G18.1c42p4-7p4-2G18.1c46p4-2G18.1c4p4-2G18.1c4p4-2G18.1c4p4-2G18.1c4p4-2G18.1c4p4-2G18.1c433p4-2G18.1p4-7p4-2G18.1p4-7c42p4-2G18.1p4-2G18.1c4p4-2G18.1p4-2G18.1c42p4-2G18.1p4-2G18.1p4-2G18.1c47p4-2G18.1p4-7p4-2G18.1p4-2G18.1p4-2G18.1p4-2G18.1p4-2G18.1c4p4-2G18.1p4-2G18.1p4-2G18.1c4p4-2G18.1p4-2G18.1c4p4-2G18.1c4p4-2G18.1p4-9p12-2G18.1p4-2G18.1c4p4-2G18.1p4-2G18.1p4-2G18.1p4-2G18.1c4p4-2G18.1p4-2G18.1p4-2G18.1p4-2G18.1c42p4-2G18.1c4p4-2G18.1p4-9p12-2G18.1p4-2G18.1c4p4-2G18.1p4-9p12-2G18.1p4-2G18.1c4p4-2G18.1c4p4-7p4-2G18.1c4p4-7p4-2G18.1p4-2G18.1p4-2G18.1p4-2G18.1p4-2G18.1p4-2G18.1p4-2G18.1p4-2G18.1p4-1p12-2G18.1p4-1p12-2G18.1p4-1p12-1p12-2G18.1p4-1p12-2G18.1c4p4-2G18.1c42p4-72p10-2p7-2c7p7-2G18.1p10-2p7-2c72G18.1c45p4-7c9p9-2G18.1p4-2G18.1c4p4-2G18.1p4-2G18.1c42p4-2G18.1p4-2G18.1p4-2G18.1c48p4-2G18.1p4-2p7-23G18.1c42p4-7c42p4-2p7-22c73G18.1c45p4-2G18.1c4p4-2G18.1c42p4-2G18.1c42p4-6c3G18.1p4-6c3G18.1p4-10p5-6c3G18.1p4-7p4-2G18.1p4-7p4-2G18.1c4p4-2G18.1p4-6c3G18.1p4-2G18.1c46p4-6G18.0c8p8-2G18.1c4p4-6G18.0p8-2G18.1p4-2G18.1p4-10p5-6c3G18.1p4-6c3G18.1p4-6c3G18.1p4-7p4-2G18.1c42p4-6G18.0c8p8-6G18.0c82p8-2G18.1c4p4-2G18.1p4-7c4p4-2G18.1p4-2G18.1p4-7c42p4-2G18.1p4-7c44p4-2G18.1p4-7p4-2G18.1p4-2G18.1c417p4-2G18.1p4-2G18.1c44p4-2c73p7-2c72p7-2p7-10c92p9-2p7-10c92p9-2p7-10c92p9-2p7-10c92p9-2p7-10p9-2p7-10c9p9-10p9-11J18.1c1p1-2p7-23p7-10p12-2p7-2G18.1p10-2p7-29c7p7-4A18p5-11J18.1c12p1-2p7-8p10-11J18.1p1-2p7-27p7-3p8-2p7-11p10-11p10-2p7-2p7-11J18p9-2p7-23p7-11p10-2p7-11p10-3c82c10p10-2c72G18.1p10-2p7-2c72p7-2p7-1p6-11p10-2p7-1p6-11p10-2p7-22c72p7-24c72p7-3p8-2p7-22c72p7-2c7p7-10p5-6G18.0p10-2c7G18.1p10-2G18.1p10-7p10-2p7-2c72G18.1p10-2G18.1p10-7p10-2p7-2c72G18.1p10-2p7-29p7-11p10-2c7G18.1p10-2p7-22p7-11p10-2c7G18.1p10-2p7-25p7-11p10-11p10-2p7-2p7-11J18p9-2p7-23p7-11p10-2p7-2p7-1p7-11p10-2p7-2p7-11J18p9-11J18.1p1-2G18.1J18.1p1-2p7-22c75p7-2c7p7-2G18.1p4-7p10-2p7-2c72p7-24p7-1p6-2c7p7-2p7-1p6-11p10-2c7p7-2c72G18.1p10-2p7-24c72p7-24c72p7-2c7p7-10p5-6G18.0J18I18p12-2c7G18.1p10-2c7G18.1p10-2p7-23c7G18.1p10-2p7-23c7G18.1p10-2c7G18.1p10-2p7-214p7-11B18p7-245p7-11p8-2p7-212p7-8p11-2p7-22p7-9p12-2p7-27c76p7-272p7-11p8-2p7-24p7-9p12-2p7-213p7-11p10-2p7-9p12-2p7-26c75G18.1c10p10-7c103p10-2p7-2G18.1p4-11J18.1c12p1-2p7-2G18.1p4-10p9-10p9-11J18.1p1-2c7p7-10p1-2G18.1J18.1p1-2c7p7-10p1-2G18.1J18.1p1-2p7-3p10-2G18.1p4-10p9-11J18.1p1-9J18.1c1p1-2p7-10p9-2G18.1p4-10p1-2G18.1J18.1p1-2p7-3J18p1-2p7-3J18p1-2p5-11p10-11J18.1p1-2G18.1J18.1p1-2p7-24p7-11p10-2p7-1p8-2p7-22p7-11p10-2p7-210p7-11J18p9-11J18.1p1-2G18.1J18.1p1-2p7-23p7-11p10-2p7-28p7-3p8-2p7-2G18.1J18.1p1-3p8-2p7-23p7-3p8-2p7-22G18.1J18.1p1-3p8-2p7-217p7-11p10-2p7-10p9-2p7-22p7-10p10-2G18.1J18.1p1-2p7-22p7-8p1-2p7-2p7-11p10-2c52p5-2c72G18.1c9p9-7c92p9-2p7-23p7-11p10-2p7-210c7p7-10c9p9-2p7-10p9-11J18.1p1-10c9p9-2p7-10p9-11J18.1p1-2p7-26p7-9p12-2p7-25p7-9p12-2p7-24p7-10p9-10J18.1p1-2p7-24p7-11p10-2p7-217p7-11p8-112p10-2p7-11p8-11p10-2p7-25p7-11c10p10-2G18.1c4p4-7p10-2p7-22c7G18.1p10-2p7-22c7G18.1p10-2p7-2c7G18.1p10-2p7-23c7G18.0p10-2p7-22c7G18.1p10-2p7-24c7G18.1J18p9-2p7-24p7-9p12-2p7-24p7-9p12-2p7-25p7-9p12-2p7-217p7-10I18p12-2p7-215p7-9p12-2p7-28p7-9p12-2p7-2p7-8p11-2p7-28p7-9p12-2p7-233p7-9p12-2p7-261p7-11p10-2p7-8p10-2p7-210p7-11p10-2p7-28p7-9c12L18

### cen19

AD1/16/19/5+E1/19/5c12AD1/16/19/5+E1/19/52c2c15AD1/16/19/5+E1/19/5c23AD1/16/19/5+E1/19/5c14c25AD1/16/19/5+E1/19/5c14c22G1/19/5+F19+R19c1AD1/16/19/5+E1/19/5c13c2c13AD1/16/19/5+E1/19/5c1AD1/16/19/5+E1/19/5c14AD1/16/19/5+E1/19/5c15AD1/16/19/5+E1/19/52c14AD1/16/19/5+E1/19/52c2c12AD1/16/19/5+E1/19/5c25c12AD1/16/19/5+E1/19/5c1AD1/16/19/5+E1/19/5c2c12AD1/16/19/5+E1/19/5c25c12AD1/16/19/5+E1/19/5c1AD1/16/19/5+E1/19/5c26AD1/16/19/5+E1/19/5c12AD1/16/19/5+E1/19/5c24c1AD1/16/19/5+E1/19/5c2c13AD1/16/19/5+E1/19/5c1AD1/16/19/5+E1/19/5c2c1c2AD1/16/19/5+E1/19/5c219AD1/16/19/5+E1/19/5c29c1AD1/16/19/5+E1/19/5c22G1/19/5+F19+R19c27G1/19/5+F19+R19c24c1c24c1c25G1/19/5+F19+R19c23G1/19/5+F19+R19c22G1/19/5+F19+R19c27G1/19/5+F19+R19c26G1/19/5+F19+R19c216G1/19/5+F19+R19c26G1/19/5+F19+R19c22G1/19/5+F19+R19c2G1/19/5+F19+R19c215G1/19/5+F19+R19c23G1/19/5+F19+R19c213G1/19/5+F19+R19c24G1/19/5+F19+R19c23G1/19/5+F19+R19c26G1/19/5+F19+R19c25AD1/16/19/5+E1/19/52c27AD1/16/19/5+E1/19/5c2c17c24c15AD1/16/19/5+E1/19/5c24c15AD1/16/19/5+E1/19/5c24c14AD1/16/19/5+E1/19/5c15AD1/16/19/5+E1/19/5c210G1/19/5+F19+R19c27c15AD1/16/19/5+E1/19/5G1/19/5+F19+R19c27c18AD1/16/19/5+E1/19/5c15AD1/16/19/5+E1/19/5c216c18AD1/16/19/5+E1/19/5c15AD1/16/19/5+E1/19/5c29c12AD1/16/19/5+E1/19/5c220c110AD1/16/19/5+E1/19/5c17AD1/16/19/5+E1/19/5G1/19/5+F19+R19c27c13AD1/16/19/5+E1/19/5c25G1/19/5+F19+R19c29c18AD1/16/19/5+E1/19/5c15AD1/16/19/5+E1/19/5c218AD1/16/19/5+E1/19/5c217c110AD1/16/19/5+E1/19/5c17AD1/16/19/5+E1/19/5c13AD1/16/19/5+E1/19/5c225c110AD1/16/19/5+E1/19/5c17AD1/16/19/5+E1/19/5c13AD1/16/19/5+E1/19/5c22c13AD1/16/19/5+E1/19/5c225c110AD1/16/19/5+E1/19/5c17AD1/16/19/5+E1/19/5c13AD1/16/19/5+E1/19/5c214c13AD1/16/19/5+E1/19/5c24c16AD1/16/19/5+E1/19/5c213AD1/16/19/5+E1/19/5c2AD1/16/19/5+E1/19/5c1c25G1/19/5+F19+R19c213c1AD1/16/19/5+E1/19/5c12AD1/16/19/5+E1/19/5c14AD1/16/19/5+E1/19/5c18AD1/16/19/5+E1/19/5c214c16c211AD1/16/19/5+E1/19/5c239c15AD1/16/19/5+E1/19/52c29AD1/16/19/5+E1/19/5c27c111AD1/16/19/5+E1/19/52c27c134AD1/16/19/5+E1/19/5c120AD1/16/19/5+E1/19/5c17AD1/16/19/5+E1/19/5c25c15c26AD1/16/19/5+E1/19/5c14AD1/16/19/5+E1/19/5c27AD1/16/19/5+E1/19/5c27c15AD1/16/19/5+E1/19/5c24c12AD1/16/19/5+E1/19/5c15AD1/16/19/5+E1/19/5c15AD1/16/19/5+E1/19/5c24c15AD1/16/19/5+E1/19/52c111AD1/16/19/5+E1/19/5c17AD1/16/19/5+E1/19/5c16AD1/16/19/5+E1/19/5c27c15AD1/16/19/5+E1/19/5c15AD1/16/19/5+E1/19/5c15AD1/16/19/5+E1/19/5c16c29c1AD1/16/19/5+E1/19/5c27c16AD1/16/19/5+E1/19/5c16c24c14c24c111c24c16AD1/16/19/5+E1/19/5c12c230c19c239G1/19/5+F19+R19c211AD1/16/19/5+E1/19/5c24c110AD1/16/19/5+E1/19/5c213AD1/16/19/5+E1/19/5c239c122AD1/16/19/5+E1/19/5c1AD1/16/19/5+E1/19/5c122AD1/16/19/5+E1/19/5c1AD1/16/19/5+E1/19/5c15AD1/16/19/5+E1/19/5c1AD1/16/19/5+E1/19/5c119AD1/16/19/5+E1/19/5c1AD1/16/19/5+E1/19/5c17AD1/16/19/5+E1/19/5c1AD1/16/19/5+E1/19/5c17AD1/16/19/5+E1/19/5c1AD1/16/19/5+E1/19/5c137AD1/16/19/5+E1/19/5c1AD1/16/19/5+E1/19/5c132AD1/16/19/5+E1/19/5c1AD1/16/19/5+E1/19/5c152AD1/16/19/5+E1/19/5c1AD1/16/19/5+E1/19/5c116AD1/16/19/5+E1/19/5c1AD1/16/19/5+E1/19/5c1808AD1/16/19/5+E1/19/5c1477AD1/16/19/5+E1/19/5c115AD1/16/19/5+E1/19/5c144AD1/16/19/5+E1/19/5c125AD1/16/19/5+E1/19/5c165AD1/16/19/5+E1/19/5c12AD1/16/19/5+E1/19/5c119AD1/16/19/5+E1/19/5c122AD1/16/19/5+E1/19/5c114AD1/16/19/5+E1/19/5c1144AD1/16/19/5+E1/19/5c1133AD1/16/19/5+E1/19/5c115AD1/16/19/5+E1/19/5c145AD1/16/19/5+E1/19/5c125AD1/16/19/5+E1/19/5c165AD1/16/19/5+E1/19/5c12AD1/16/19/5+E1/19/5c125AD1/16/19/5+E1/19/5c128AD1/16/19/5+E1/19/5c114AD1/16/19/5+E1/19/5c12AD1/16/19/5+E1/19/5c156AD1/16/19/5+E1/19/5c17AD1/16/19/5+E1/19/5c130AD1/16/19/5+E1/19/5c154AD1/16/19/5+E1/19/5c19AD1/16/19/5+E1/19/5c131AD1/16/19/5+E1/19/5c111AD1/16/19/5+E1/19/5c12AD1/16/19/5+E1/19/5c120AD1/16/19/5+E1/19/5c115AD1/16/19/5+E1/19/5c117AD1/16/19/5+E1/19/5c127AD1/16/19/5+E1/19/5c143AD1/16/19/5+E1/19/5c12AD1/16/19/5+E1/19/5c128AD1/16/19/5+E1/19/5c175AD1/16/19/5+E1/19/5c112AD1/16/19/5+E1/19/5c1133AD1/16/19/5+E1/19/5c120AD1/16/19/5+E1/19/5c138AD1/16/19/5+E1/19/5c112AD1/16/19/5+E1/19/5c16AD1/16/19/5+E1/19/5c15AD1/16/19/5+E1/19/5c16AD1/16/19/5+E1/19/5c15AD1/16/19/5+E1/19/5c110AD1/16/19/5+E1/19/5c134AD1/16/19/5+E1/19/5c15AD1/16/19/5+E1/19/5c14AD1/16/19/5+E1/19/5c15AD1/16/19/5+E1/19/5c14AD1/16/19/5+E1/19/5c111AD1/16/19/5+E1/19/5c113AD1/16/19/5+E1/19/5c110AD1/16/19/5+E1/19/5c12AD1/16/19/5+E1/19/5c18AD1/16/19/5+E1/19/5c1AD1/16/19/5+E1/19/5c1129AD1/16/19/5+E1/19/5c14AD1/16/19/5+E1/19/5c1238AD1/16/19/5+E1/19/5c114c24c110AD1/16/19/5+E1/19/5c178AD1/16/19/5+E1/19/5c125AD1/16/19/5+E1/19/5c138AD1/16/19/5+E1/19/5c13AD1/16/19/5+E1/19/5c1172c224c1500AD1/16/19/5+E1/19/5c1289AD1/16/19/5+E1/19/5c16AD1/16/19/5+E1/19/5c1753AD1/16/19/5+E1/19/5c266c1112AD1/16/19/5+E1/19/5c18AD1/16/19/5+E1/19/5c17AD1/16/19/5+E1/19/5c18AD1/16/19/5+E1/19/5c135AD1/16/19/5+E1/19/5c153AD1/16/19/5+E1/19/5c18AD1/16/19/5+E1/19/5c113AD1/16/19/5+E1/19/5c1138AD1/16/19/5+E1/19/5c161AD1/16/19/5+E1/19/5c2104c18c235c16AD1/16/19/5+E1/19/5c117AD1/16/19/5+E1/19/5c18AD1/16/19/5+E1/19/5c110AD1/16/19/5+E1/19/5c13AD1/16/19/5+E1/19/5c110AD1/16/19/5+E1/19/5c14AD1/16/19/5+E1/19/5c19AD1/16/19/5+E1/19/5c19AD1/16/19/5+E1/19/5c125AD1/16/19/5+E1/19/5c115AD1/16/19/5+E1/19/5c1c25c18AD1/16/19/5+E1/19/5c133AD1/16/19/5+E1/19/5c12AD1/16/19/5+E1/19/5c113AD1/16/19/5+E1/19/5c123AD1/16/19/5+E1/19/5c16AD1/16/19/5+E1/19/5c163AD1/16/19/5+E1/19/5c110AD1/16/19/5+E1/19/5c16AD1/16/19/5+E1/19/5c16AD1/16/19/5+E1/19/5c17AD1/16/19/5+E1/19/5c14AD1/16/19/5+E1/19/5c155AD1/16/19/5+E1/19/5c18AD1/16/19/5+E1/19/52c118AD1/16/19/5+E1/19/5c111AD1/16/19/5+E1/19/5c14AD1/16/19/5+E1/19/5c18AD1/16/19/5+E1/19/5c116AD1/16/19/5+E1/19/5c18AD1/16/19/5+E1/19/5c110AD1/16/19/5+E1/19/5c13AD1/16/19/5+E1/19/5c18AD1/16/19/5+E1/19/5c120AD1/16/19/5+E1/19/5c12AD1/16/19/5+E1/19/5c1AD1/16/19/5+E1/19/5c113AD1/16/19/5+E1/19/5c18AD1/16/19/5+E1/19/5c115AD1/16/19/5+E1/19/5c12AD1/16/19/5+E1/19/5c12AD1/16/19/5+E1/19/5c16c23G1/19/5+F19+R19c212AD1/16/19/5+E1/19/5c122c29G1/19/5+F19+R19c213c16c211G1/19/5+F19+R19c25c17AD1/16/19/5+E1/19/52c15AD1/16/19/5+E1/19/5c1AD1/16/19/5+E1/19/52c1AD1/16/19/5+E1/19/5c12AD1/16/19/5+E1/19/5c1c2c113AD1/16/19/5+E1/19/5c14AD1/16/19/5+E1/19/5c17AD1/16/19/5+E1/19/5c219c15AD1/16/19/5+E1/19/5c14AD1/16/19/5+E1/19/5c13AD1/16/19/5+E1/19/5c15AD1/16/19/5+E1/19/5c14AD1/16/19/5+E1/19/5c15AD1/16/19/5+E1/19/5c14AD1/16/19/5+E1/19/5c12AD1/16/19/5+E1/19/5c15AD1/16/19/5+E1/19/5c25c14AD1/16/19/5+E1/19/5c25c14AD1/16/19/5+E1/19/52c16AD1/16/19/5+E1/19/5c110AD1/16/19/5+E1/19/5c28G1/19/5+F19+R19c218c16AD1/16/19/5+E1/19/5c212c18AD1/16/19/5+E1/19/5c25AD1/16/19/5+E1/19/5c16AD1/16/19/5+E1/19/5c25c15AD1/16/19/5+E1/19/5c15AD1/16/19/5+E1/19/5c1AD1/16/19/5+E1/19/52c14AD1/16/19/5+E1/19/5c17AD1/16/19/5+E1/19/5c14AD1/16/19/5+E1/19/5c114AD1/16/19/5+E1/19/5G1/19/5+F19+R19c23G1/19/5+F19+R19c2c113AD1/16/19/5+E1/19/5c24G1/19/5+F19+R19c212G1/19/5+F19+R19c26c13AD1/16/19/5+E1/19/5c1c24G1/19/5+F19+R19c217G1/19/5+F19+R19c28c1c2c12AD1/16/19/5+E1/19/5c15c25AD1/16/19/5+E1/19/5c1c24c112AD1/16/19/5+E1/19/5c13AD1/16/19/5+E1/19/5c1c26c17AD1/16/19/5+E1/19/5c1c27c119AD1/16/19/5+E1/19/5c113AD1/16/19/5+E1/19/52c110AD1/16/19/5+E1/19/5c112AD1/16/19/5+E1/19/5c13AD1/16/19/5+E1/19/5c23AD1/16/19/5+E1/19/5c13AD1/16/19/5+E1/19/5c23c12AD1/16/19/5+E1/19/5c19AD1/16/19/5+E1/19/5c24c12AD1/16/19/5+E1/19/5c13AD1/16/19/5+E1/19/5c13AD1/16/19/5+E1/19/5c12AD1/16/19/5+E1/19/52c18AD1/16/19/5+E1/19/5c12AD1/16/19/5+E1/19/52c18AD1/16/19/5+E1/19/5c17AD1/16/19/5+E1/19/5c22c15AD1/16/19/5+E1/19/5c12AD1/16/19/5+E1/19/5c22c12AD1/16/19/5+E1/19/5c19AD1/16/19/5+E1/19/5c12AD1/16/19/5+E1/19/5c19AD1/16/19/5+E1/19/5c1AD1/16/19/5+E1/19/5c12AD1/16/19/5+E1/19/5c28c18AD1/16/19/5+E1/19/5c12AD1/16/19/5+E1/19/5c18AD1/16/19/5+E1/19/5c29c15AD1/16/19/5+E1/19/5c18AD1/16/19/5+E1/19/5c15c2c19AD1/16/19/5+E1/19/5c115AD1/16/19/5+E1/19/5c114c29c124AD1/16/19/5+E1/19/5c26G1/19/5+F19+R19c216G1/19/5+F19+R19c213G1/19/5+F19+R19c28c12c28AD1/16/19/5+E1/19/5c26c17AD1/16/19/5+E1/19/5c26c16c210c110AD1/16/19/5+E1/19/5c110AD1/16/19/5+E1/19/5c12AD1/16/19/5+E1/19/5c113AD1/16/19/5+E1/19/5c1AD1/16/19/5+E1/19/5c13AD1/16/19/5+E1/19/5c14AD1/16/19/5+E1/19/5c2c15AD1/16/19/5+E1/19/5c25c1c26AD1/16/19/5+E1/19/5c17AD1/16/19/5+E1/19/52c14AD1/16/19/5+E1/19/5c226c110c28G1/19/5+F19+R19c25c1AD1/16/19/5+E1/19/5c17c28c17AD1/16/19/5+E1/19/5c115AD1/16/19/5+E1/19/5c17AD1/16/19/5+E1/19/5c149AD1/16/19/5+E1/19/5c1AD1/16/19/5+E1/19/53c1AD1/16/19/5+E1/19/5c13AD1/16/19/5+E1/19/5c12AD1/16/19/5+E1/19/5c1AD1/16/19/5+E1/19/52c18AD1/16/19/5+E1/19/5c212G1/19/5+F19+R19c27G1/19/5+F19+R19c23AD1/16/19/5+E1/19/53c13AD1/16/19/5+E1/19/5c1AD1/16/19/5+E1/19/5c116AD1/16/19/5+E1/19/5c1AD1/16/19/5+E1/19/52c12AD1/16/19/5+E1/19/52c13AD1/16/19/5+E1/19/5c1AD1/16/19/5+E1/19/52c1AD1/16/19/5+E1/19/52c19c212c1AD1/16/19/5+E1/19/5c23c12AD1/16/19/5+E1/19/5c1AD1/16/19/5+E1/19/5c24c1AD1/16/19/5+E1/19/52c1AD1/16/19/5+E1/19/52c15AD1/16/19/5+E1/19/5c26G1/19/5+F19+R19c23AD1/16/19/5+E1/19/5c12AD1/16/19/5+E1/19/52c17AD1/16/19/5+E1/19/5c18AD1/16/19/5+E1/19/5c110AD1/16/19/5+E1/19/5c110AD1/16/19/5+E1/19/5c12AD1/16/19/5+E1/19/5c116AD1/16/19/5+E1/19/5c13AD1/16/19/5+E1/19/5c1AD1/16/19/5+E1/19/54c1AD1/16/19/5+E1/19/53c14AD1/16/19/5+E1/19/5c1AD1/16/19/5+E1/19/52c1AD1/16/19/5+E1/19/52c15AD1/16/19/5+E1/19/5c1c25c111AD1/16/19/5+E1/19/52c1AD1/16/19/5+E1/19/52c19c212c110AD1/16/19/5+E1/19/5c29G1/19/5+F19+R19c29G1/19/5+F19+R19c215G1/19/5+F19+R19c210c111AD1/16/19/5+E1/19/5c25c13AD1/16/19/5+E1/19/5c238c117AD1/16/19/5+E1/19/5c25c15AD1/16/19/5+E1/19/5c17AD1/16/19/5+E1/19/5c217c18AD1/16/19/5+E1/19/5c16AD1/16/19/5+E1/19/5c16AD1/16/19/5+E1/19/5c119c252c12AD1/16/19/5+E1/19/52c13AD1/16/19/5+E1/19/5c1AD1/16/19/5+E1/19/5c2c16AD1/16/19/5+E1/19/52c16AD1/16/19/5+E1/19/5c13AD1/16/19/5+E1/19/5c2c1AD1/16/19/5+E1/19/5c25c1c23c1AD1/16/19/5+E1/19/5c25c1AD1/16/19/5+E1/19/5c223G1/19/5+F19+R19c22G1/19/5+F19+R19c22AD1/16/19/5+E1/19/52c16AD1/16/19/5+E1/19/5c17AD1/16/19/5+E1/19/5c24G1/19/5+F19+R19AD1/16/19/5+E1/19/5c12AD1/16/19/5+E1/19/5c24G1/19/5+F19+R19AD1/16/19/5+E1/19/5c13AD1/16/19/5+E1/19/5c1AD1/16/19/5+E1/19/5c1AD1/16/19/5+E1/19/5c1AD1/16/19/5+E1/19/5c1AD1/16/19/5+E1/19/5c1AD1/16/19/5+E1/19/5c1AD1/16/19/5+E1/19/5c1AD1/16/19/5+E1/19/5c12AD1/16/19/5+E1/19/5c1AD1/16/19/5+E1/19/52c1AD1/16/19/5+E1/19/5c1AD1/16/19/5+E1/19/5c2c1AD1/16/19/5+E1/19/52c1AD1/16/19/5+E1/19/5c1AD1/16/19/5+E1/19/5c12AD1/16/19/5+E1/19/5c2c12AD1/16/19/5+E1/19/5c1AD1/16/19/5+E1/19/5c12AD1/16/19/5+E1/19/5c1AD1/16/19/5+E1/19/5c12AD1/16/19/5+E1/19/5c1AD1/16/19/5+E1/19/52c1AD1/16/19/5+E1/19/5c12AD1/16/19/5+E1/19/52c1AD1/16/19/5+E1/19/5c1AD1/16/19/5+E1/19/52c1AD1/16/19/5+E1/19/5c1AD1/16/19/5+E1/19/5c12AD1/16/19/5+E1/19/5c1AD1/16/19/5+E1/19/52c1AD1/16/19/5+E1/19/5c1AD1/16/19/5+E1/19/5c12AD1/16/19/5+E1/19/5c1AD1/16/19/5+E1/19/5c12AD1/16/19/5+E1/19/5c1AD1/16/19/5+E1/19/52c1AD1/16/19/5+E1/19/5c1AD1/16/19/5+E1/19/5c12AD1/16/19/5+E1/19/5c1AD1/16/19/5+E1/19/5c12AD1/16/19/5+E1/19/5c1AD1/16/19/5+E1/19/5c12AD1/16/19/5+E1/19/5c1AD1/16/19/5+E1/19/5c12AD1/16/19/5+E1/19/5c1AD1/16/19/5+E1/19/5c12AD1/16/19/5+E1/19/5c1AD1/16/19/5+E1/19/5c12AD1/16/19/5+E1/19/5c1AD1/16/19/5+E1/19/5c12AD1/16/19/5+E1/19/5c1AD1/16/19/5+E1/19/5c12AD1/16/19/5+E1/19/5c1AD1/16/19/5+E1/19/52c12AD1/16/19/5+E1/19/5c1AD1/16/19/5+E1/19/5c12AD1/16/19/5+E1/19/5c1AD1/16/19/5+E1/19/5c12AD1/16/19/5+E1/19/5c1AD1/16/19/5+E1/19/5c12AD1/16/19/5+E1/19/5c1AD1/16/19/5+E1/19/5c12AD1/16/19/5+E1/19/5c1AD1/16/19/5+E1/19/52c1AD1/16/19/5+E1/19/5c1AD1/16/19/5+E1/19/52c1AD1/16/19/5+E1/19/5c1AD1/16/19/5+E1/19/52c1AD1/16/19/5+E1/19/52c1AD1/16/19/5+E1/19/5c1AD1/16/19/5+E1/19/52c1AD1/16/19/5+E1/19/52c1AD1/16/19/5+E1/19/5c2c12AD1/16/19/5+E1/19/5c1AD1/16/19/5+E1/19/5c12AD1/16/19/5+E1/19/5c1AD1/16/19/5+E1/19/5c1AD1/16/19/5+E1/19/5c23c1AD1/16/19/5+E1/19/5c1AD1/16/19/5+E1/19/5c13AD1/16/19/5+E1/19/5c1AD1/16/19/5+E1/19/52c1AD1/16/19/5+E1/19/5c1AD1/16/19/5+E1/19/5c110AD1/16/19/5+E1/19/5c1AD1/16/19/5+E1/19/5c16AD1/16/19/5+E1/19/5c12AD1/16/19/5+E1/19/5c13AD1/16/19/5+E1/19/5c16AD1/16/19/5+E1/19/5c2c13AD1/16/19/5+E1/19/5c15AD1/16/19/5+E1/19/5c1AD1/16/19/5+E1/19/52c13AD1/16/19/5+E1/19/5c13AD1/16/19/5+E1/19/5c12AD1/16/19/5+E1/19/5c12AD1/16/19/5+E1/19/5c13AD1/16/19/5+E1/19/5c128AD1/16/19/5+E1/19/5c114AD1/16/19/5+E1/19/5c19AD1/16/19/5+E1/19/5c19AD1/16/19/5+E1/19/5c17AD1/16/19/5+E1/19/5c115AD1/16/19/5+E1/19/5c116AD1/16/19/5+E1/19/5c111AD1/16/19/5+E1/19/5c112AD1/16/19/5+E1/19/5c16AD1/16/19/5+E1/19/5c17AD1/16/19/5+E1/19/5c112AD1/16/19/5+E1/19/5c12AD1/16/19/5+E1/19/5c17AD1/16/19/5+E1/19/5c111AD1/16/19/5+E1/19/5c16AD1/16/19/5+E1/19/5c113c24c16AD1/16/19/5+E1/19/5c15AD1/16/19/5+E1/19/52c18AD1/16/19/5+E1/19/5c14AD1/16/19/5+E1/19/5c13AD1/16/19/5+E1/19/5c14AD1/16/19/5+E1/19/5c23c1AD1/16/19/5+E1/19/5c12AD1/16/19/5+E1/19/52c14AD1/16/19/5+E1/19/5c211c1AD1/16/19/5+E1/19/5c15AD1/16/19/5+E1/19/5c26c1AD1/16/19/5+E1/19/5c19AD1/16/19/5+E1/19/5c24c12AD1/16/19/5+E1/19/5c19AD1/16/19/5+E1/19/5c12AD1/16/19/5+E1/19/5c14AD1/16/19/5+E1/19/5c12c23c17AD1/16/19/5+E1/19/5c12AD1/16/19/5+E1/19/5c13AD1/16/19/5+E1/19/5c12c25c13AD1/16/19/5+E1/19/5c12c22c12AD1/16/19/5+E1/19/5c17AD1/16/19/5+E1/19/5c114AD1/16/19/5+E1/19/5c15AD1/16/19/5+E1/19/5c111AD1/16/19/5+E1/19/5c15AD1/16/19/5+E1/19/5c112AD1/16/19/5+E1/19/5c13AD1/16/19/5+E1/19/5c14AD1/16/19/5+E1/19/5c12AD1/16/19/5+E1/19/5c13AD1/16/19/5+E1/19/5c111AD1/16/19/5+E1/19/5c111AD1/16/19/5+E1/19/5c13AD1/16/19/5+E1/19/5c18AD1/16/19/5+E1/19/5c12AD1/16/19/5+E1/19/5c14AD1/16/19/5+E1/19/5c12AD1/16/19/5+E1/19/5c1AD1/16/19/5+E1/19/5c14AD1/16/19/5+E1/19/5c14AD1/16/19/5+E1/19/5c1AD1/16/19/5+E1/19/5c1AD1/16/19/5+E1/19/5c14AD1/16/19/5+E1/19/5c14AD1/16/19/5+E1/19/5c1AD1/16/19/5+E1/19/5c12AD1/16/19/5+E1/19/5c12c29c12AD1/16/19/5+E1/19/5c13AD1/16/19/5+E1/19/5c14AD1/16/19/5+E1/19/5c1AD1/16/19/5+E1/19/5c18AD1/16/19/5+E1/19/5c134AD1/16/19/5+E1/19/5c16AD1/16/19/5+E1/19/5c19AD1/16/19/5+E1/19/5c16AD1/16/19/5+E1/19/5c19AD1/16/19/5+E1/19/5c137c2G1/19/5+F19+R19c210c19AD1/16/19/5+E1/19/5c1c22c17AD1/16/19/5+E1/19/5c15AD1/16/19/5+E1/19/5c110AD1/16/19/5+E1/19/5c13AD1/16/19/5+E1/19/5c16AD1/16/19/5+E1/19/52c15c22c12AD1/16/19/5+E1/19/53c15AD1/16/19/5+E1/19/5c22c1AD1/16/19/5+E1/19/5c1AD1/16/19/5+E1/19/5c22c1AD1/16/19/5+E1/19/5c23c13AD1/16/19/5+E1/19/5c26AD1/16/19/5+E1/19/5c218c1AD1/16/19/5+E1/19/5c29c1AD1/16/19/5+E1/19/5c26c12AD1/16/19/5+E1/19/5c24AD1/16/19/5+E1/19/5c24G1/19/5+F19+R19c28c1AD1/16/19/5+E1/19/5c28G1/19/5+F19+R19c16AD1/16/19/5+E1/19/5c223c1AD1/16/19/5+E1/19/5c249c17c29c19AD1/16/19/5+E1/19/54c14AD1/16/19/5+E1/19/5

### cen20

p12-13p12-14p1-2D20p6-10L20A20p7-13p15-7c144p14-3p16-7c142p14-3p16-7c142c1212p14-112p14-5p9-12K20.1p14-16p7-15p14-15F2/20c152O20c12c1419p14-9c23p2-9c27p2-14p7-10c16p16-12N20c715p7-5p6-16p7-11p14-5p7-11N20c76c912p9-6p9-10c78p7-10c13p13-11c142c124p14-113p14-12K20.1c14p14-11p14-5c59p5-10K20c1236p14-10c129p12-3c1610p16-13p12-15c11p11-13c122p12-13c12p12-13c12p12-13c12p12-13c125p12-13c12p12-13c12p12-13c127p12-13c12p12-13c12p12-13c124p12-13c12p12-13c122p12-13c128p12-13c1210p12-5c16P20c33p3-16c32p3-14c14N20c14N20c126p12-3c104p10-6c155p15-6c155p15-6c157p15-3p10-14c1414p14-16c39p3-6c156p15-6c15p15-6c152p1-6c157p15-16c38p3-6c156p15-6c152p1-6c1512p15-16c3p3-162c3p3-16c244p2-5c1623p16-10c13p13-10c133K20p12-1c38p3-13c122p12-13c124p12-6c95p9-13p12-1p3-13p12-1p3-1c38p3-13c126p12-13c1234L20c1516p15-12c1512p15-11c1418p14-16c3p3-16c37p3-16c3p3-14c116p11-13c122p12-5p7-13c124p12-13c122p12-13c122p12-5c72p7-11c147c123p12-13c12p12-13c12p12-13c12p12-5c78p7-16c3p3-13c122p12-13c122p12-13c123p12-13c127p12-7c213p2-13c123p12-13c12p12-13c1214c14p14-11c14p14-11c1429c124p12-13c127p12-13c125p12-13c125p12-13c123p12-13c1222p12-5p7-11c14p14-5p7-11c1420p14-7c14p14-6p8-11p14-6p8-11c143p14-15F2/20p8-11c1410p14-7c14p14-6p8-11p14-6p8-11c143p14-15F2/20p8-11c145p14-6p11-6p11-15F2/20c13p13-5p7-11p14-6c84p8-14c122p12-14c122p12-14c123L20

### cen21

G13/21.1p1-3p1-2p9-7p1-2p9-3p8-2c313p4-22p4-6c723p11-6c75G13/21c15I13/21p4-6c72p5-7c8p10-7c8p10-7c8p10-7c82p10-7c8p10-7c83p10-7c83p10-7c83p10-7c82p10-7c83p10-7c83p10-7c87p1-3c433p1-5c6p7-11c16p8-11c12p8-4c539

### cen22

p5-7p1-2D14/22c164p3-8c1p3-1c241D14/22c513p1-4c54p1-4c55p1-5c629p7-5c65p7-5c737p3-4c542A14/22c22p4-7p1-7c823p1-7c83p1-7c8p1-7p1-3c421p3-1c215p4-1p4-8c1p4-1p4-82c15p4-8c14p4-1c23p4-1p4-8c1p4-12p4-8c15p4-1c27p4-8p4-1c22p4-8p4-7c86c120p3-8c124p3-8c1p3-8c12p3-8c18p3-8c1p3-82c1p3-7c827p1-52c63G14/22B14/22c312p6-7p1-7c830p1-7c84p1-7c83p1-5c62p7-5G14/22p2-5p7-5G14/22p2-5c62G14/22p1-5c6G14/22p2-5c63G14/22p2-5p7-5G14/22p2-5G14/22p1-5c6G14/22p2-5c62G14/22p2-5c63G14/22p1-5c6G14/22p2-5c63p7-8p2-5c63G14/22p2-5c6p7-52p7-8p2-5c63G14/22p2-5c64p7-5c62G14/22p2-5c65p7-5c62p7-5c62p7-5c62p7-5c66p7-5c6p7-5c66p7-8c1147p2-7c893p1-7c86p1-7c8211p1-72c8p1-72c8p1-7c820p1-7c840p1-7c818p1-7c854p1-72c810p1-72c82p1-7c82p1-72c82p2-7c839p1-72c82p1-7c82p1-72c82p2-7c823p1-6c738p1-6c74p1-6c7151p1-6c714p1-6c711p1-6c76p1-6c712p1-6c7p1-6c718p1-6c7123p1-6c716p1-6c714p1-6c77p1-6c712p1-6c7p1-6c79p1-6c7p1-6c720p1-7c8129p1-7p1-6c73p1-73c82p1-72c8p1-5G14/22p1-7c8p1-7c83p1-7c82p1-5G14/22p1-7c8p1-7c83p1-7c83p1-7c86p1-72c87p1-7c83p1-7c83p1-7c8p1-5c6p7-5G14/22p1-5c64p7-5G14/22p1-5c6p7-5G14/22p1-5c62p7-5c6p7-5G14/22p2-5c62p7-5G14/22c8p1-5p7-52G14/22p1-5c6p7-5c6G14/22p1-5c65p7-52G14/22c82p1-7c82p1-5c65p7-5p7-8p8-5p7-52c6p7-5c62G14/22p1-5c6G14/22p1-5c6G14/22p1-5c62G14/22p1-5c6G14/22p1-5c6G14/22p1-5c6G14/22p1-5c63p7-5c64p7-5c6p7-5c68p7-5c62G14/22p1-5c6G14/22p1-5c63p7-5c62p7-5c6p7-5c615p7-5c64p7-5c66p7-5c6c75p7-2c3c62p7-5c6p7-5c6p7-5c62p7-5c6c72p7-2c3c62p7-5c6p7-5c6p7-5c62p7-5c6c75G14/22c8p2-82c12p2-8c12B14/22c3E14/22

### cenX

p10-12p5-6IXLXp2-3EXp9-12p2-5c622p7-12c13p2-6c73p8-6c7p8-5c695p6-9c1026KXc123p1-7c8128p11-7c82p11-7c811p11-7c8p11-7c8p11-7c8p11-7c811KXc128p7-5c62p6-11c12p7-10c1150p12-6c7174p1-9c10240p1-9c108p12-9c1018p12-9c108p12-9c1019p12-9c108p12-9c1013p1-9c10p1-11c1241p7-11c126p7-11c125p7-11c127p7-11c1216p7-11c124p7-3c413p5-3c421EXc614p7-3c452p5-2c342p11-5c657p6-12c14p8-11c123p8-11c12p8-12c1p8-4c532p6-2c3p5-1c224p3-4c52p6-44p6-12c194p2-12c111p2-7c814p9-7c85p9-7c821p11-4c528p6-2c387DXp9-10

### cenY

p-7--25c-2440p-24--32p-30--323c-308p-30--32p-30--25V'p-24--9
